# Supplementary material
Source: publisher figshare collection journal article supplement (https://acs.figshare.com/ndownloader/files/15638702)

# **Supporting Information 5**

**(Gil Hong Park)**

**Preventive effect of compound 1 derivatives  
on osteoporosis induced by ovariectomy  
in ddY mice**

# Protocol

Ovariectomized ddY mice were fed compound 1 derivatives in 300  $\mu$ L phosphate-buffered saline (PBS) per os via gavage once daily from 1 week after ovariectomy for 4 weeks

## **Experimental group** (4 mice per group)

Sh: Sham unovariectomized mice fed 300  $\mu$ L of 0.5% DMSO-containing PBS once daily

OVX: Ovariectomized mice fed 300  $\mu$ L of 0.5% DMSO-containing PBS once daily

Alen: Ovariectomized mice fed alendronate 10 mg/kg/d

C1: Ovariectomized mice fed compound 1 10 mg/kg/d

2g: Ovariectomized mice fed 2g 10 mg/kg/d

2c·10: Ovariectomized mice fed 2c 10 mg/kg/d

2c·1: Ovariectomized mice fed 2c 1 mg/kg/d

# Scanning Condition

## [System]

Scanner=SkyScan1173(Ver 1.6)  
Source Voltage (kV)= 110  
Source Current (uA)= 72  
Number of Rows= 2240  
Number of Columns= 2240  
Image Pixel Size (um)=13.85  
Filter=Al 1.0mm  
Exposure (ms)= 500  
Rotation Step (deg)=0.3  
Frame averaging=4

## [Reconstruction]

Reconstruction Program=Nrecon(Ver. 1.7.0.4)  
Pixel Size (um)=13.85  
Angular Step (deg)=0.3  
Frame averaging=7  
ROI Right (pixels)=2240  
ROI reference length=2240  
Beam Hardening Correction (%)=40  
Minimum for CS to Image Conversion=0.0000  
Maximum for CS to Image Conversion=0.0350

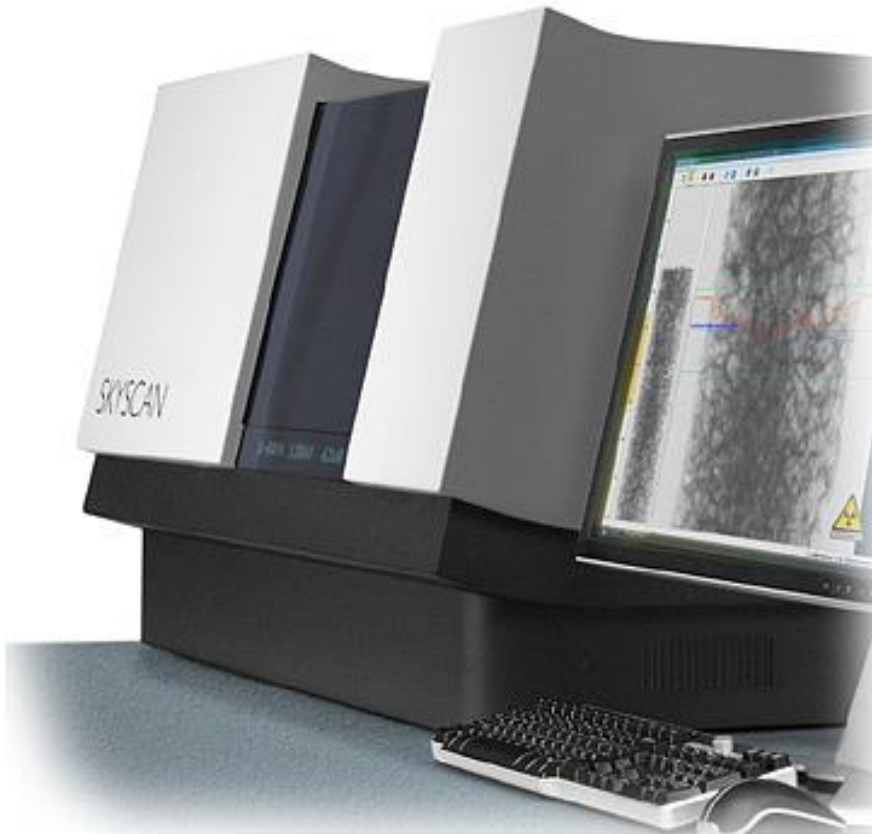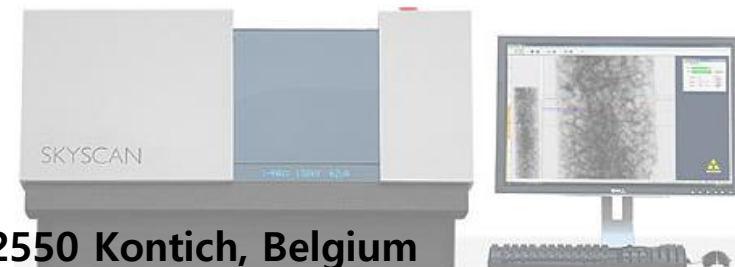

SkyScan1173; Bruker-CT, Kartuizersweg 3B 2550 Kontich, Belgium

# Evaluation of bone mineral density and new bone formation in ovariectomized mice

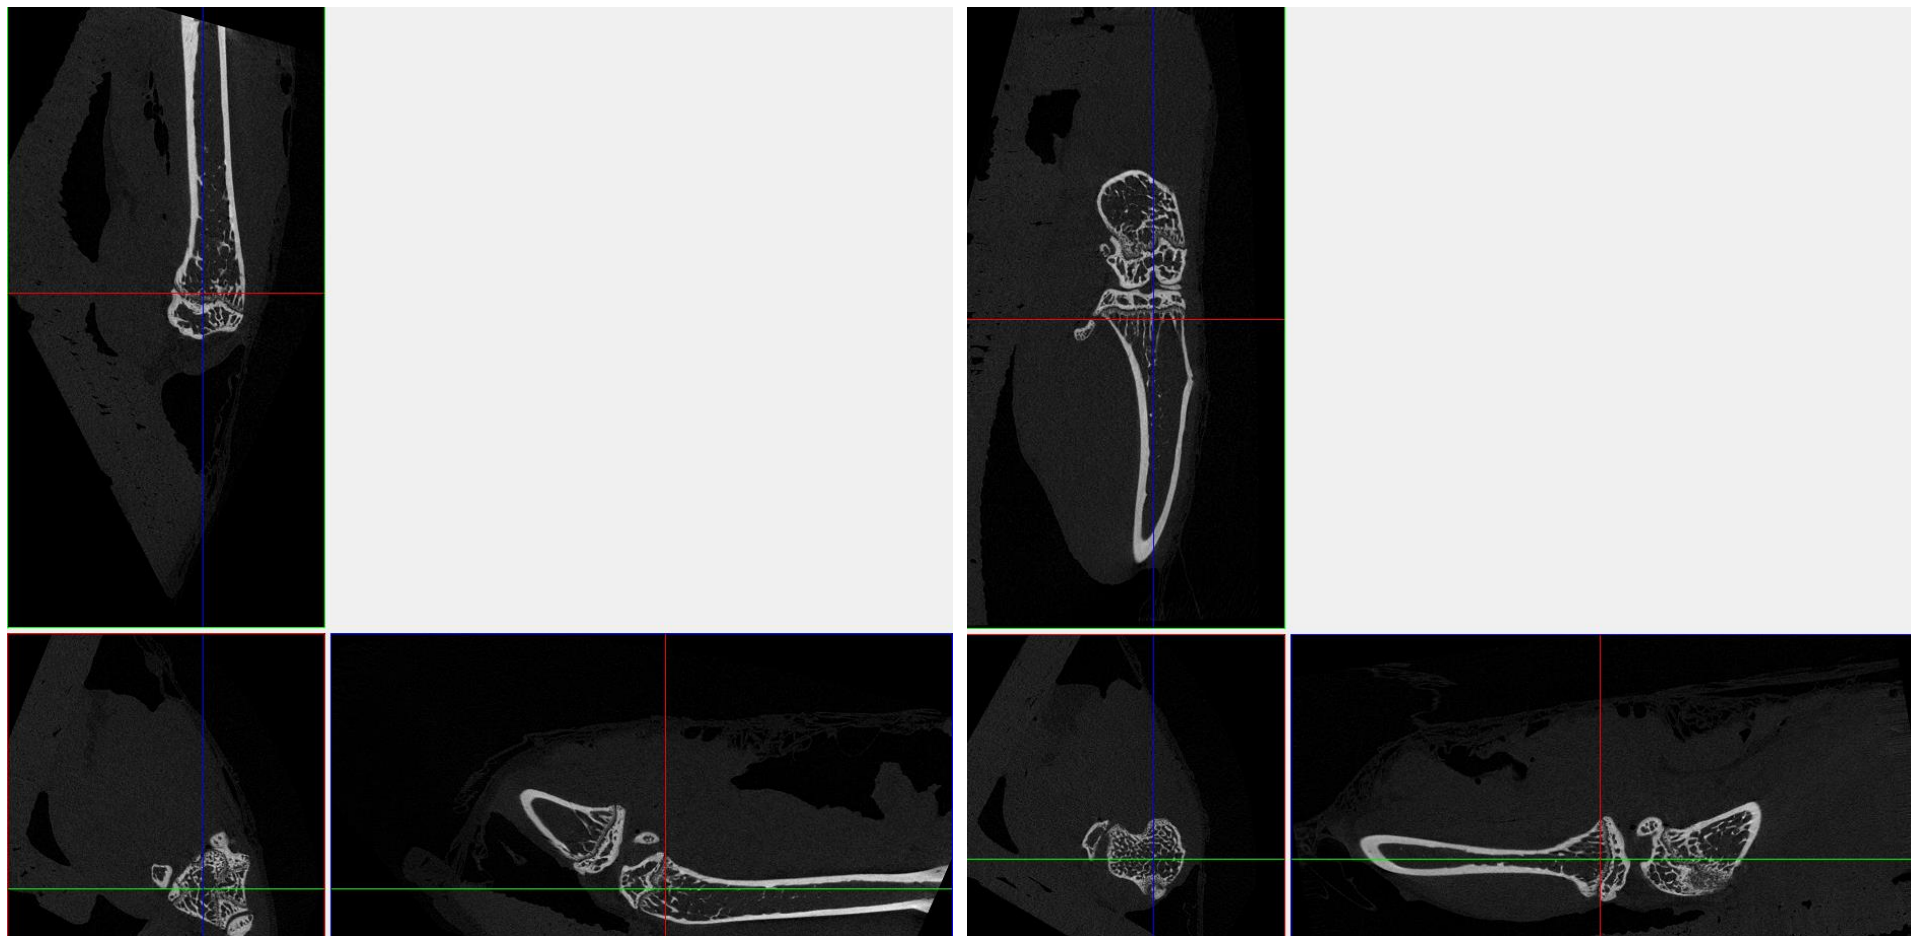

# Evaluation of bone mineral density and new bone formation in ovariectomized mice

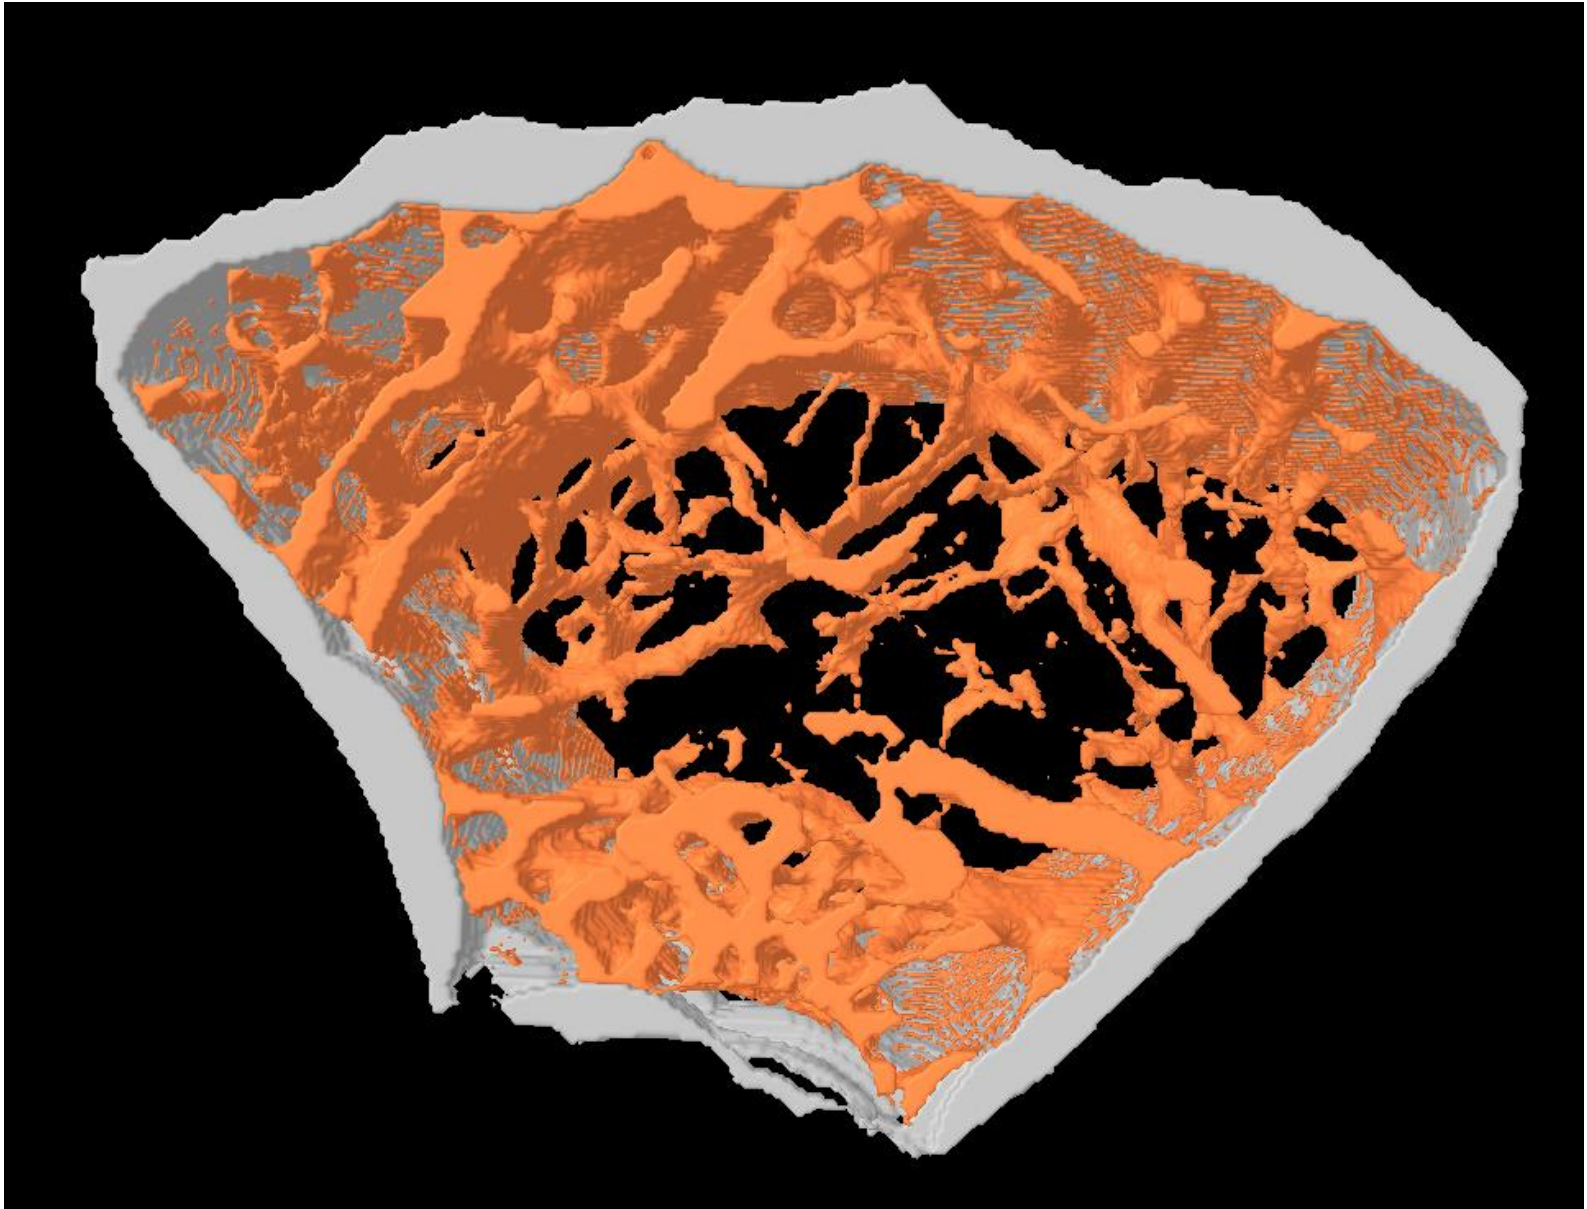



# Evaluation of bone mineral density and new bone formation in ovariectomized mice

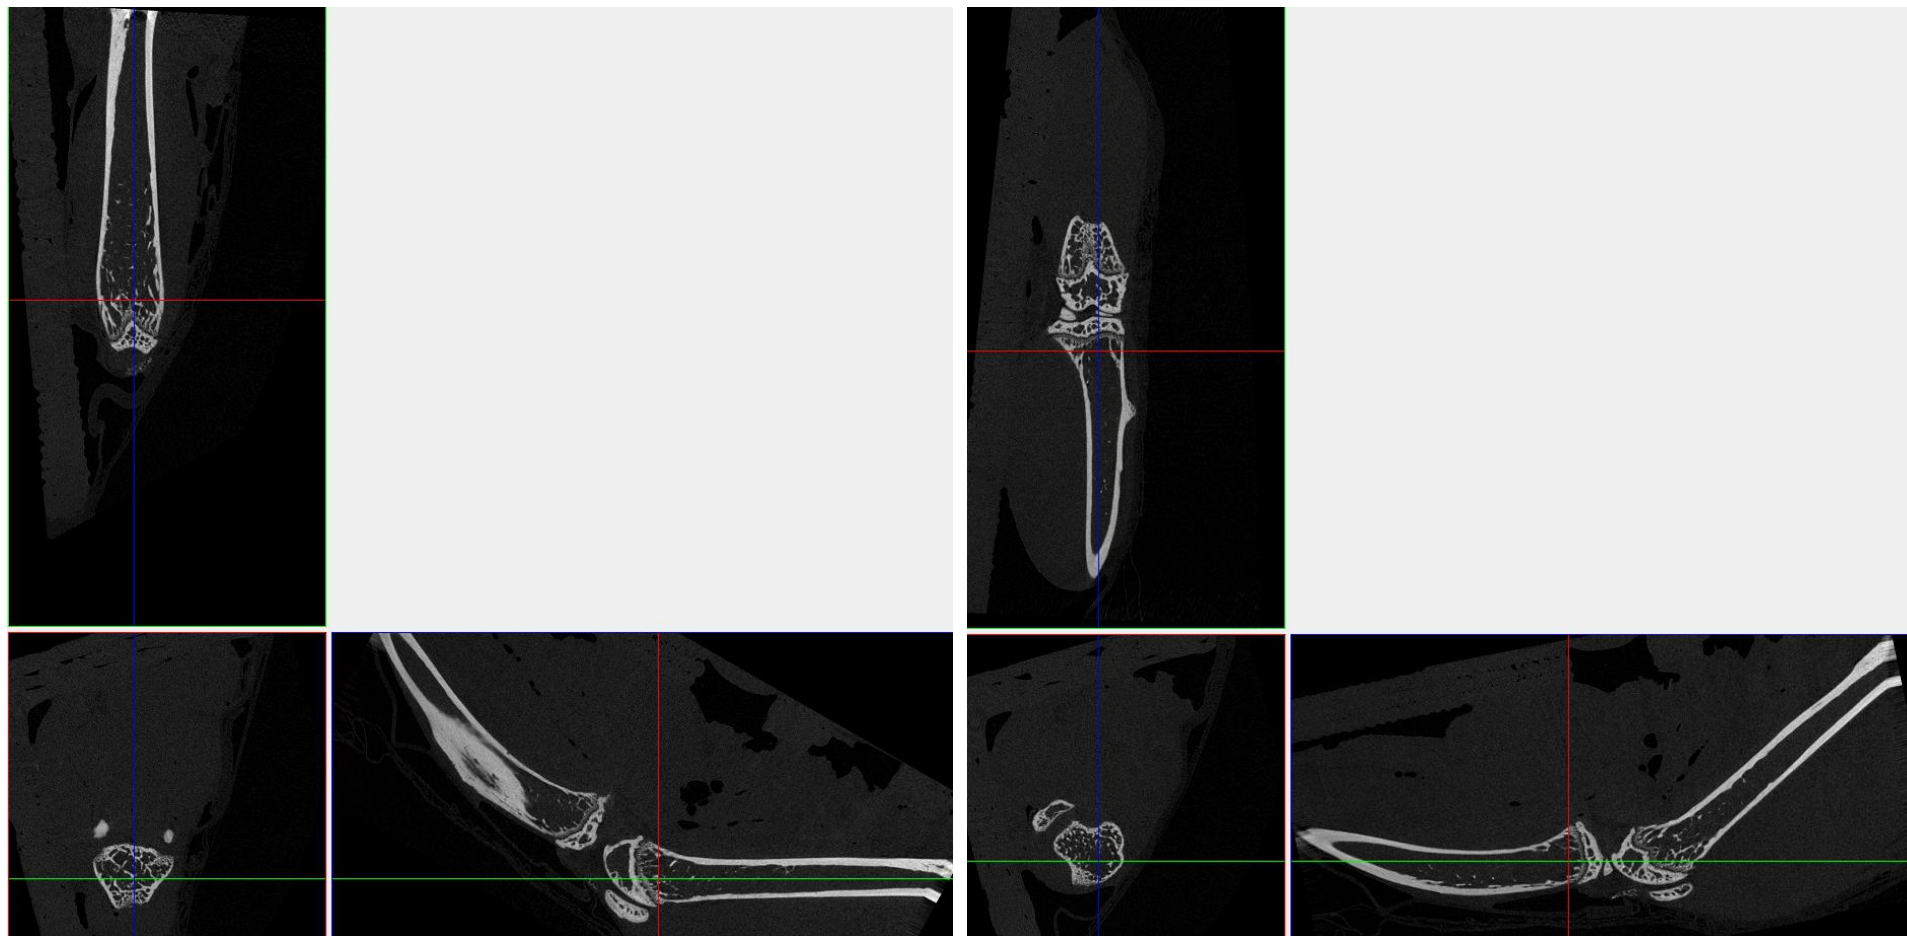

# Evaluation of bone mineral density and new bone formation in ovariectomized mice

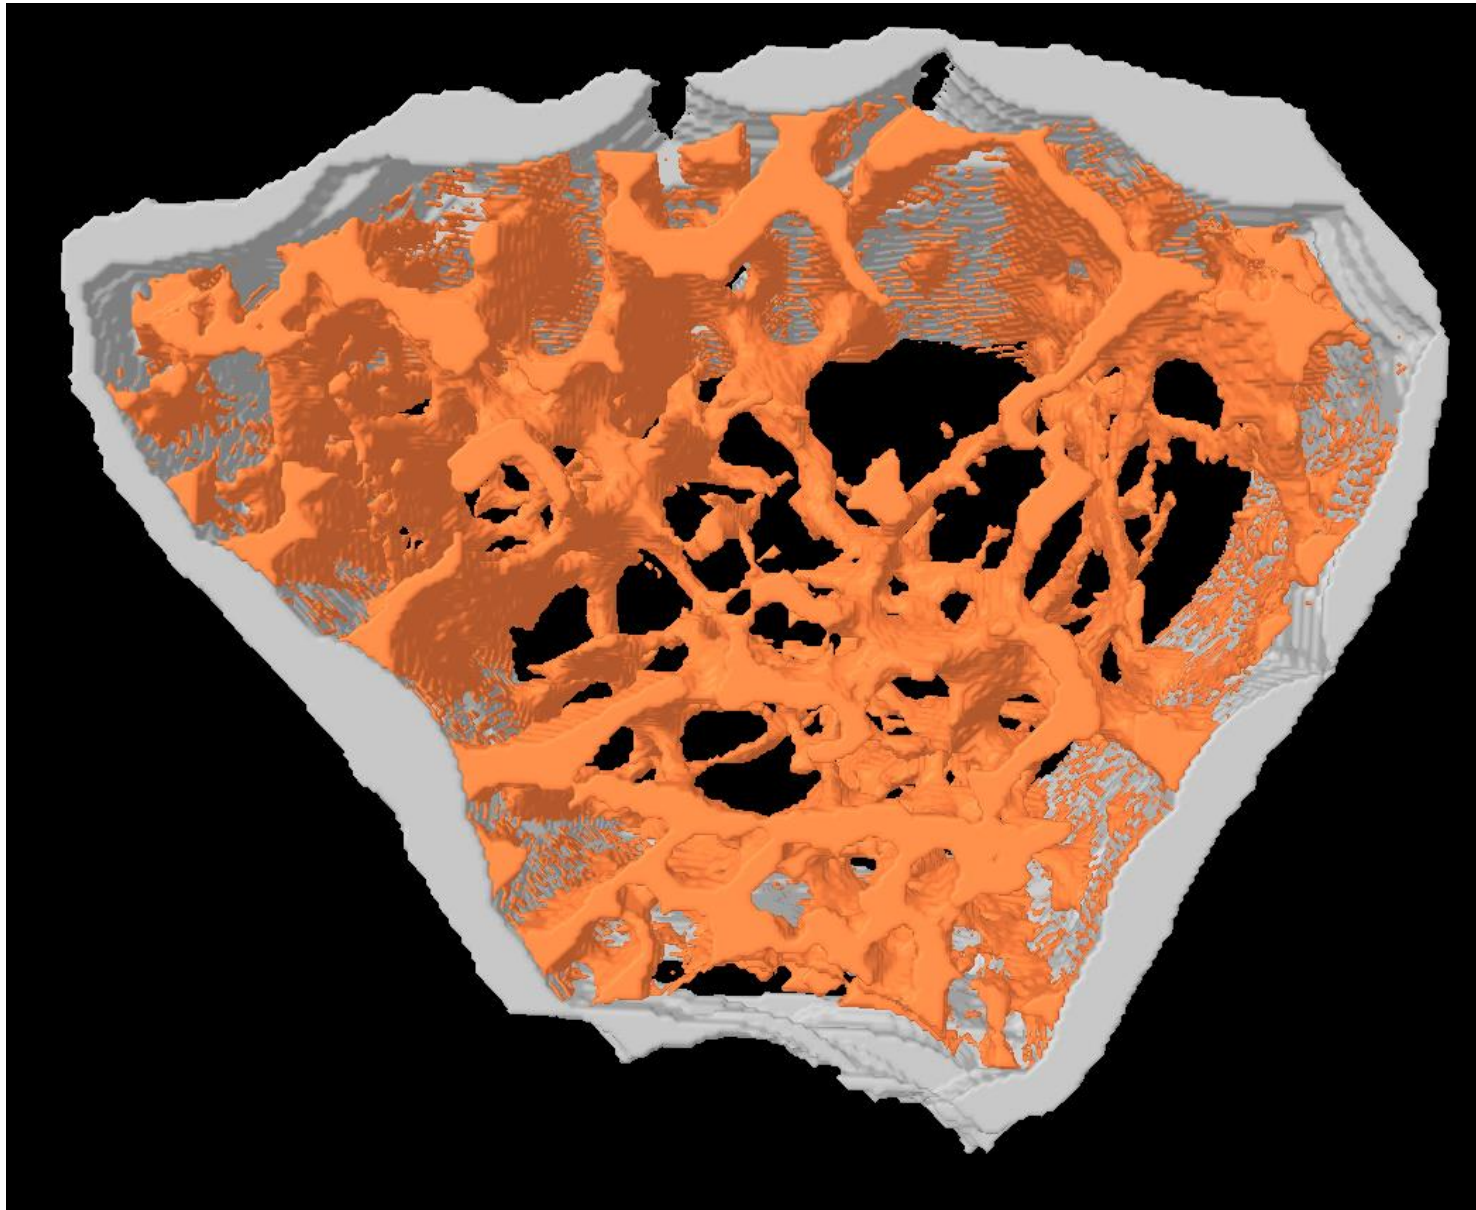

# Evaluation of bone mineral density and new bone formation in ovariectomized mice

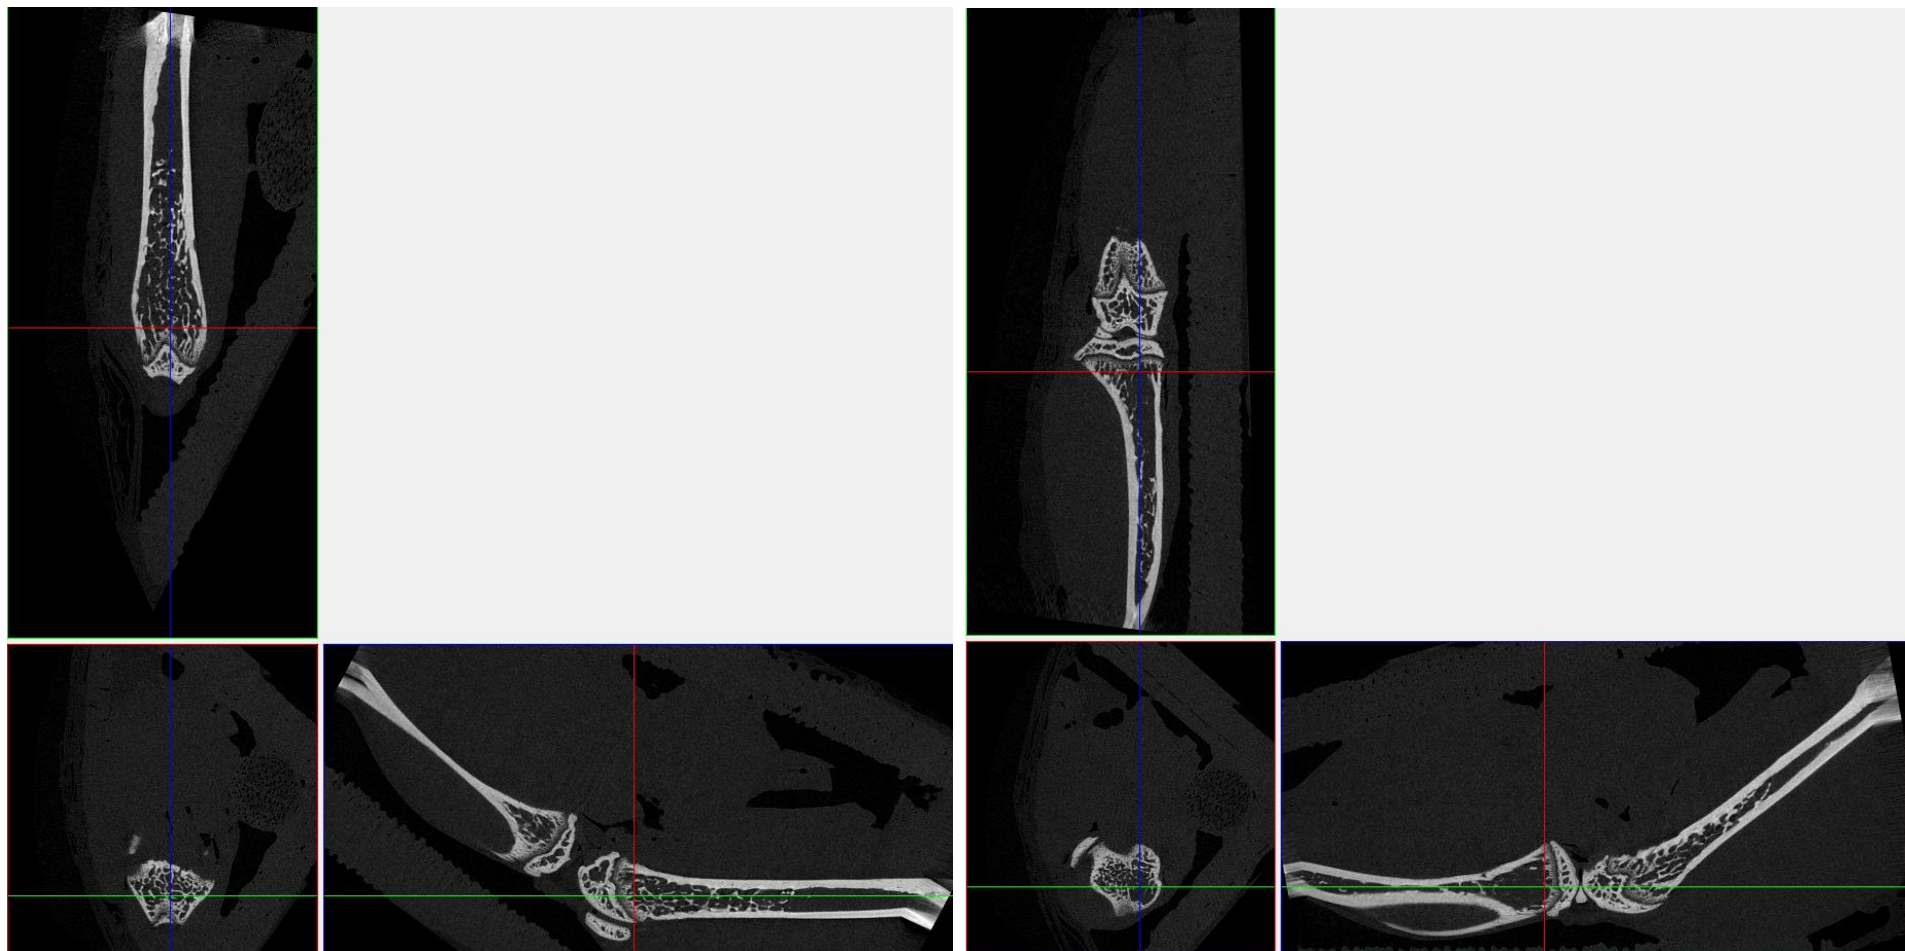



# Evaluation of bone mineral density and new bone formation in ovariectomized mice

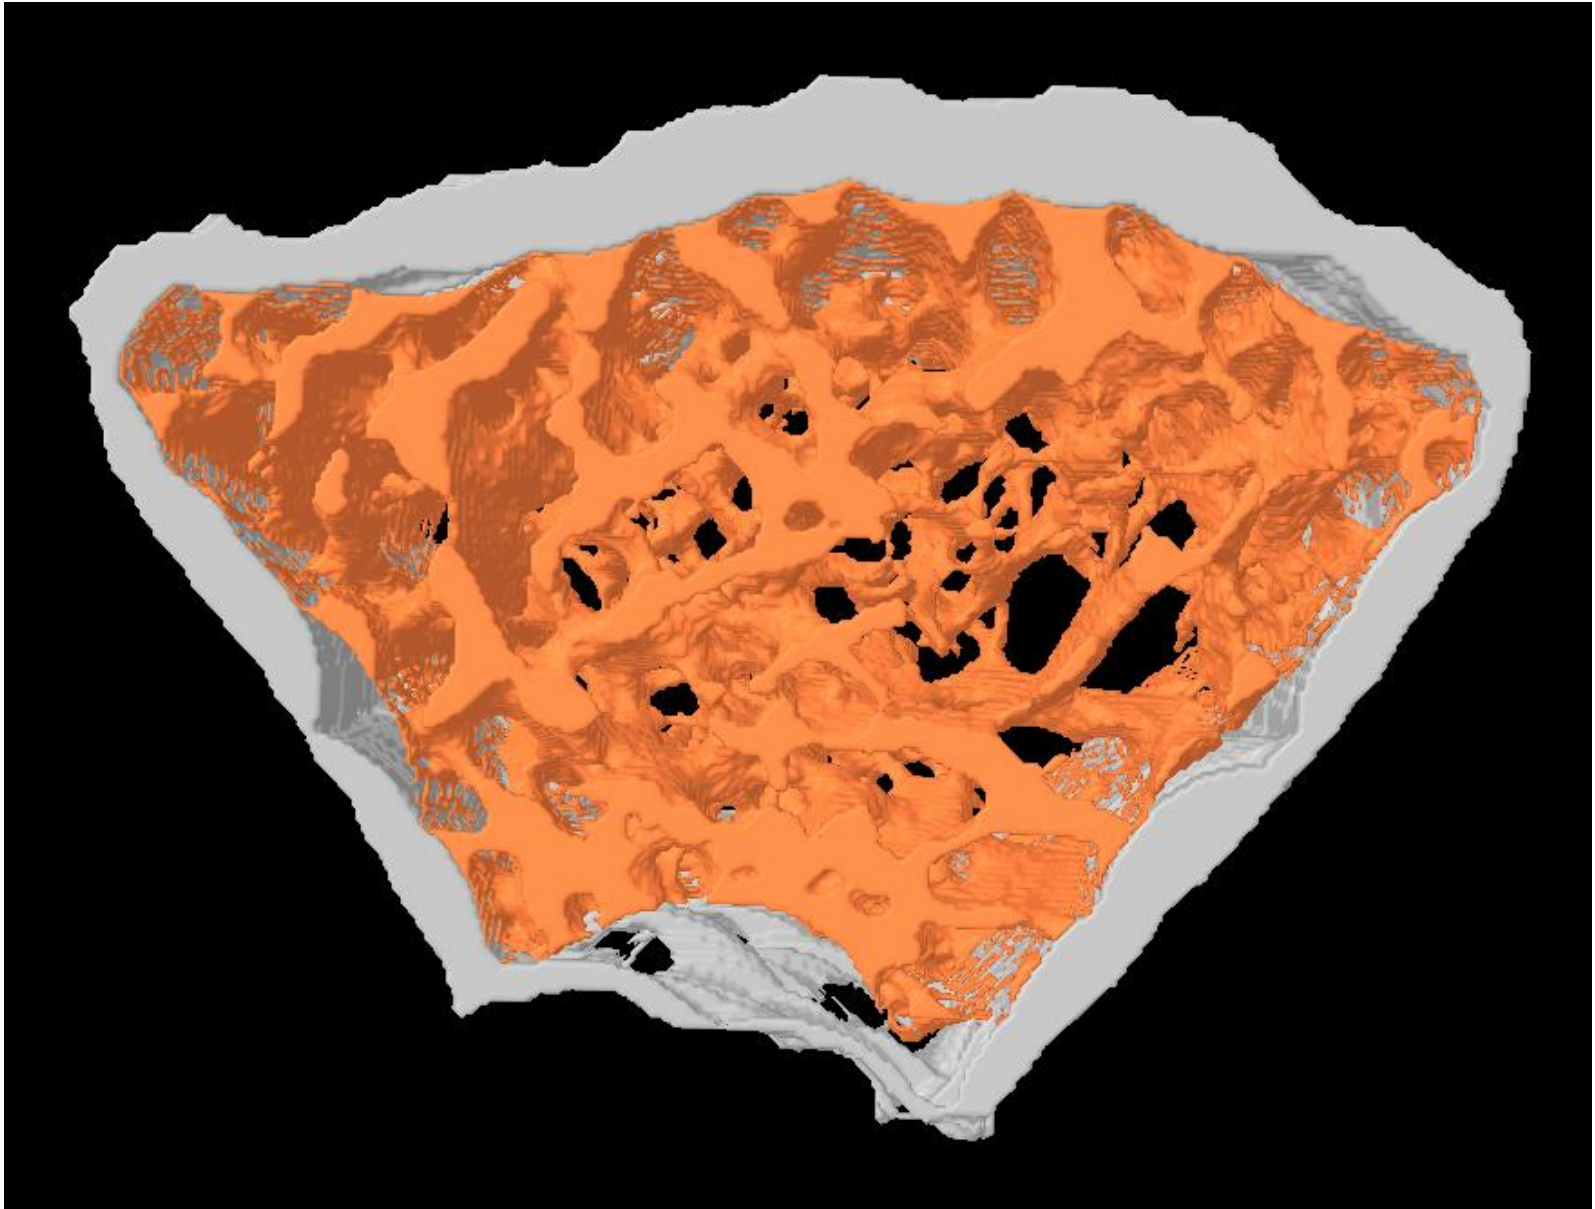

# Evaluation of bone mineral density and new bone formation in ovariectomized mice

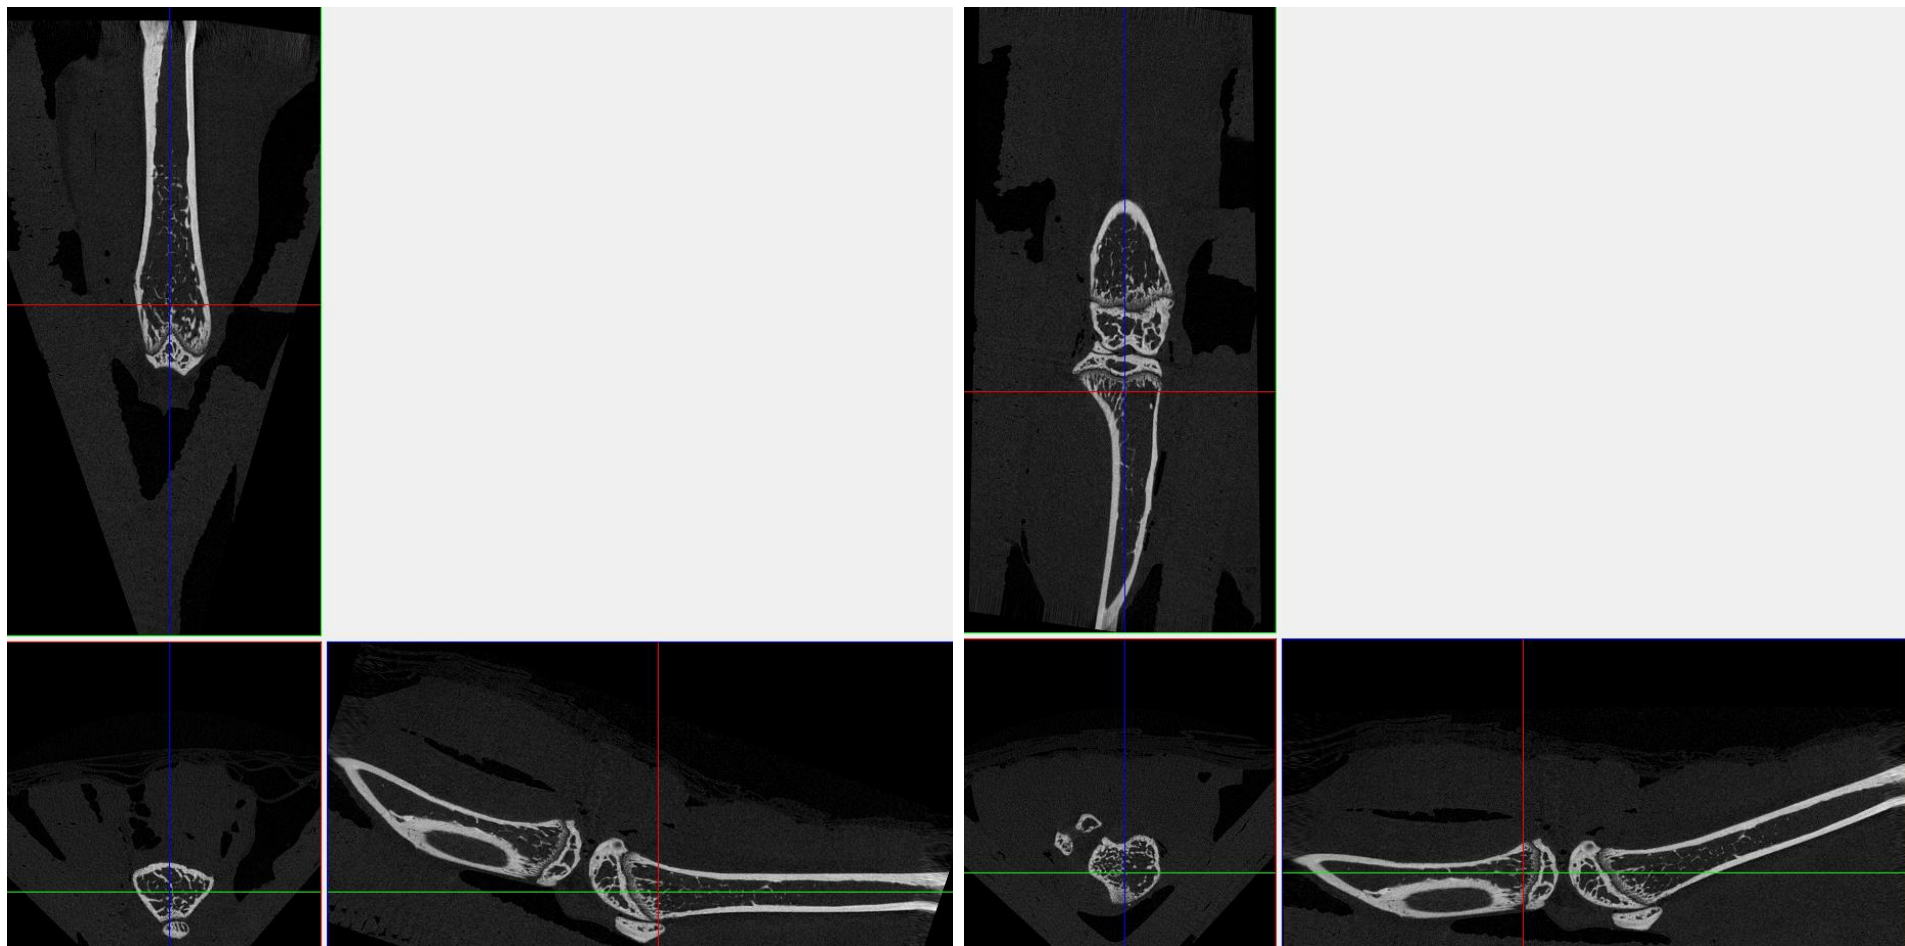

# Evaluation of bone mineral density and new bone formation in ovariectomized mice

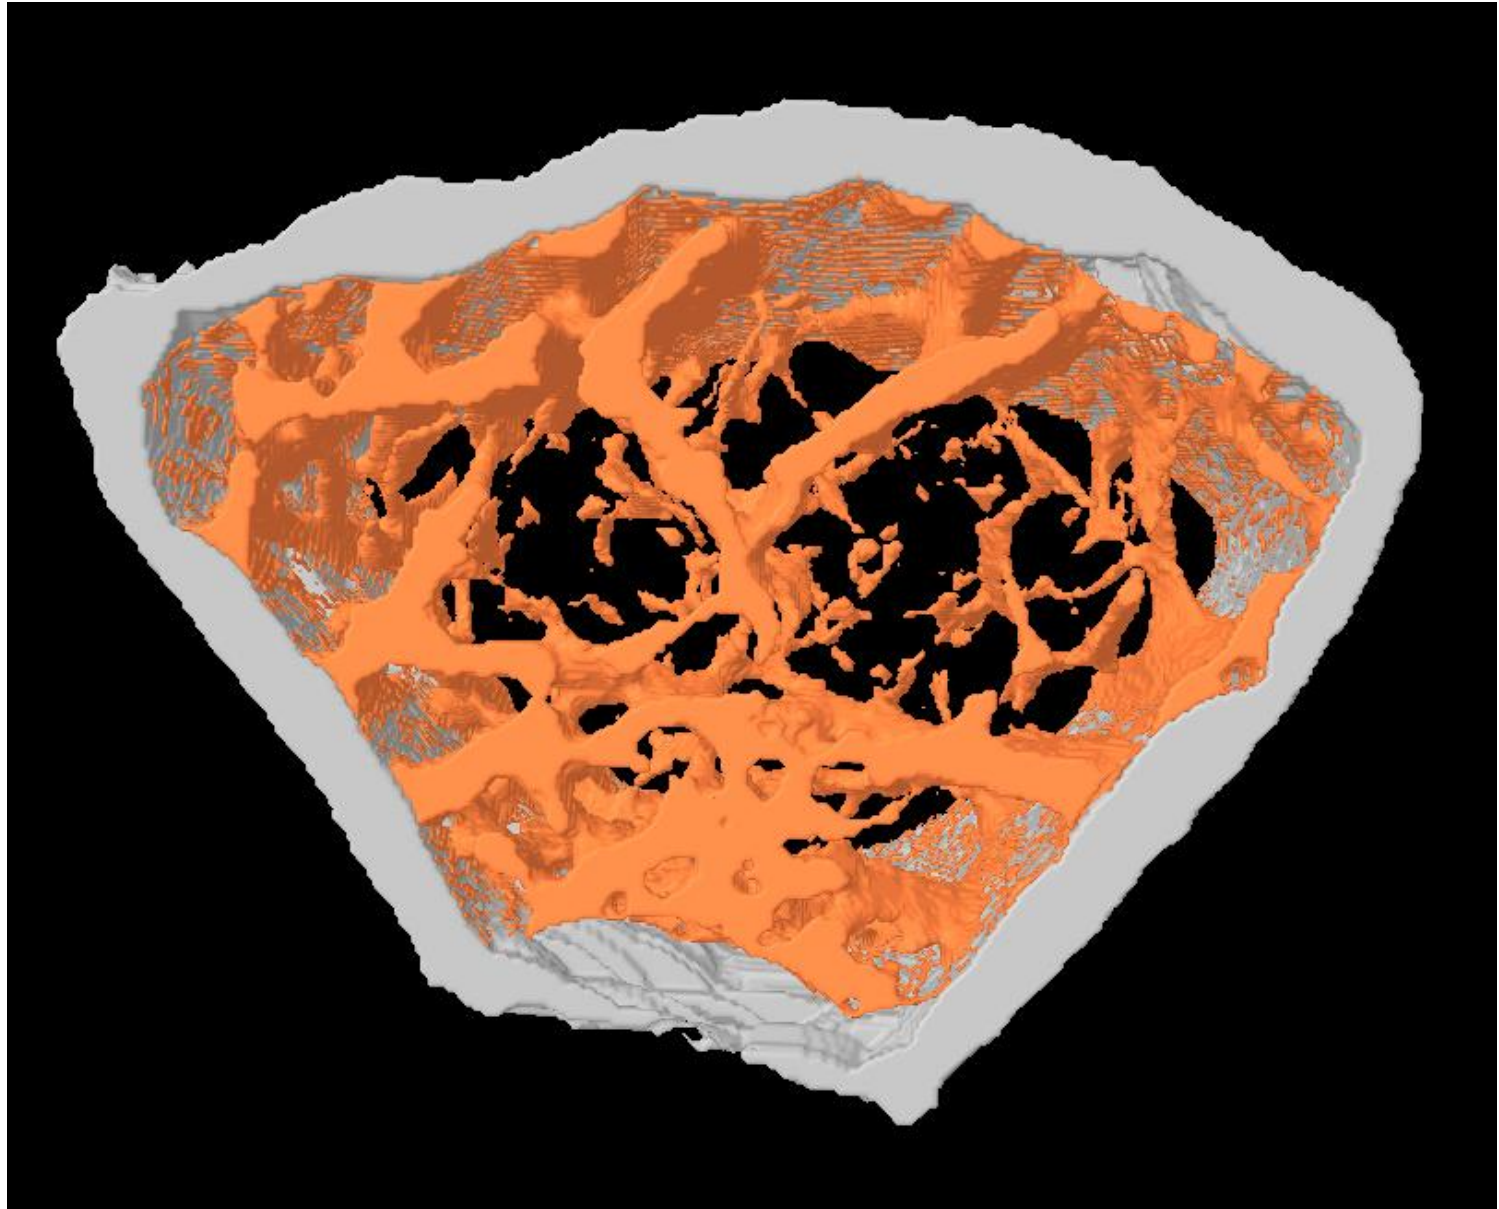

# Evaluation of bone mineral density and new bone formation in ovariectomized mice

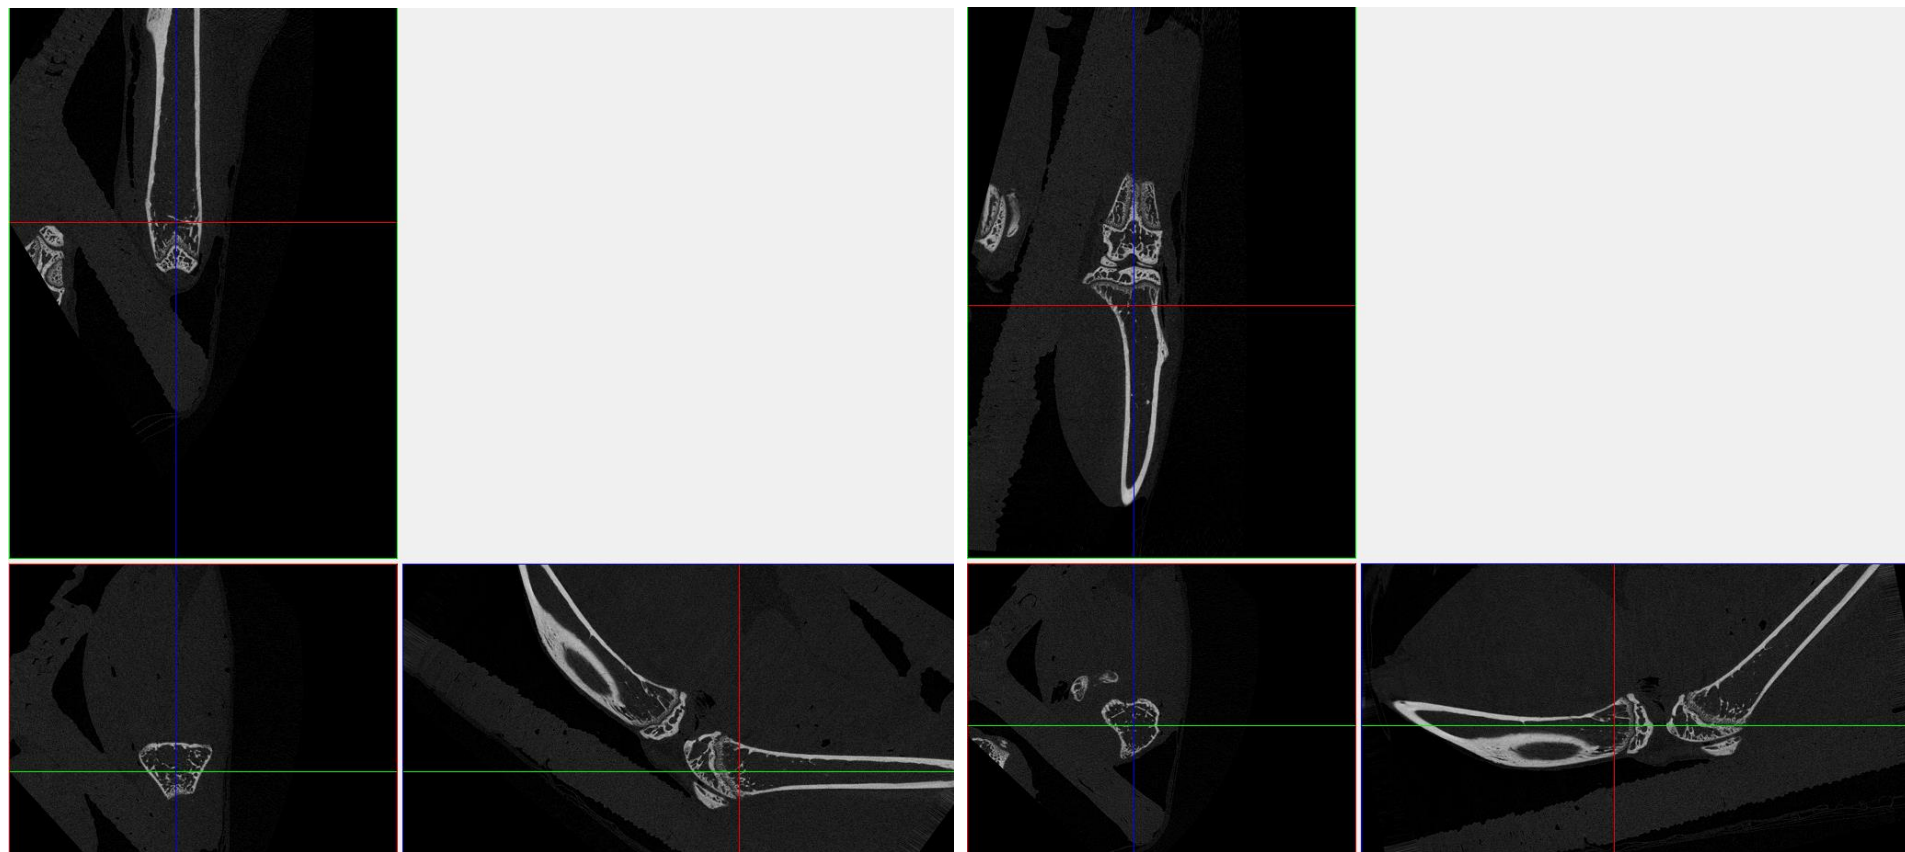



# Evaluation of bone mineral density and new bone formation in ovariectomized mice

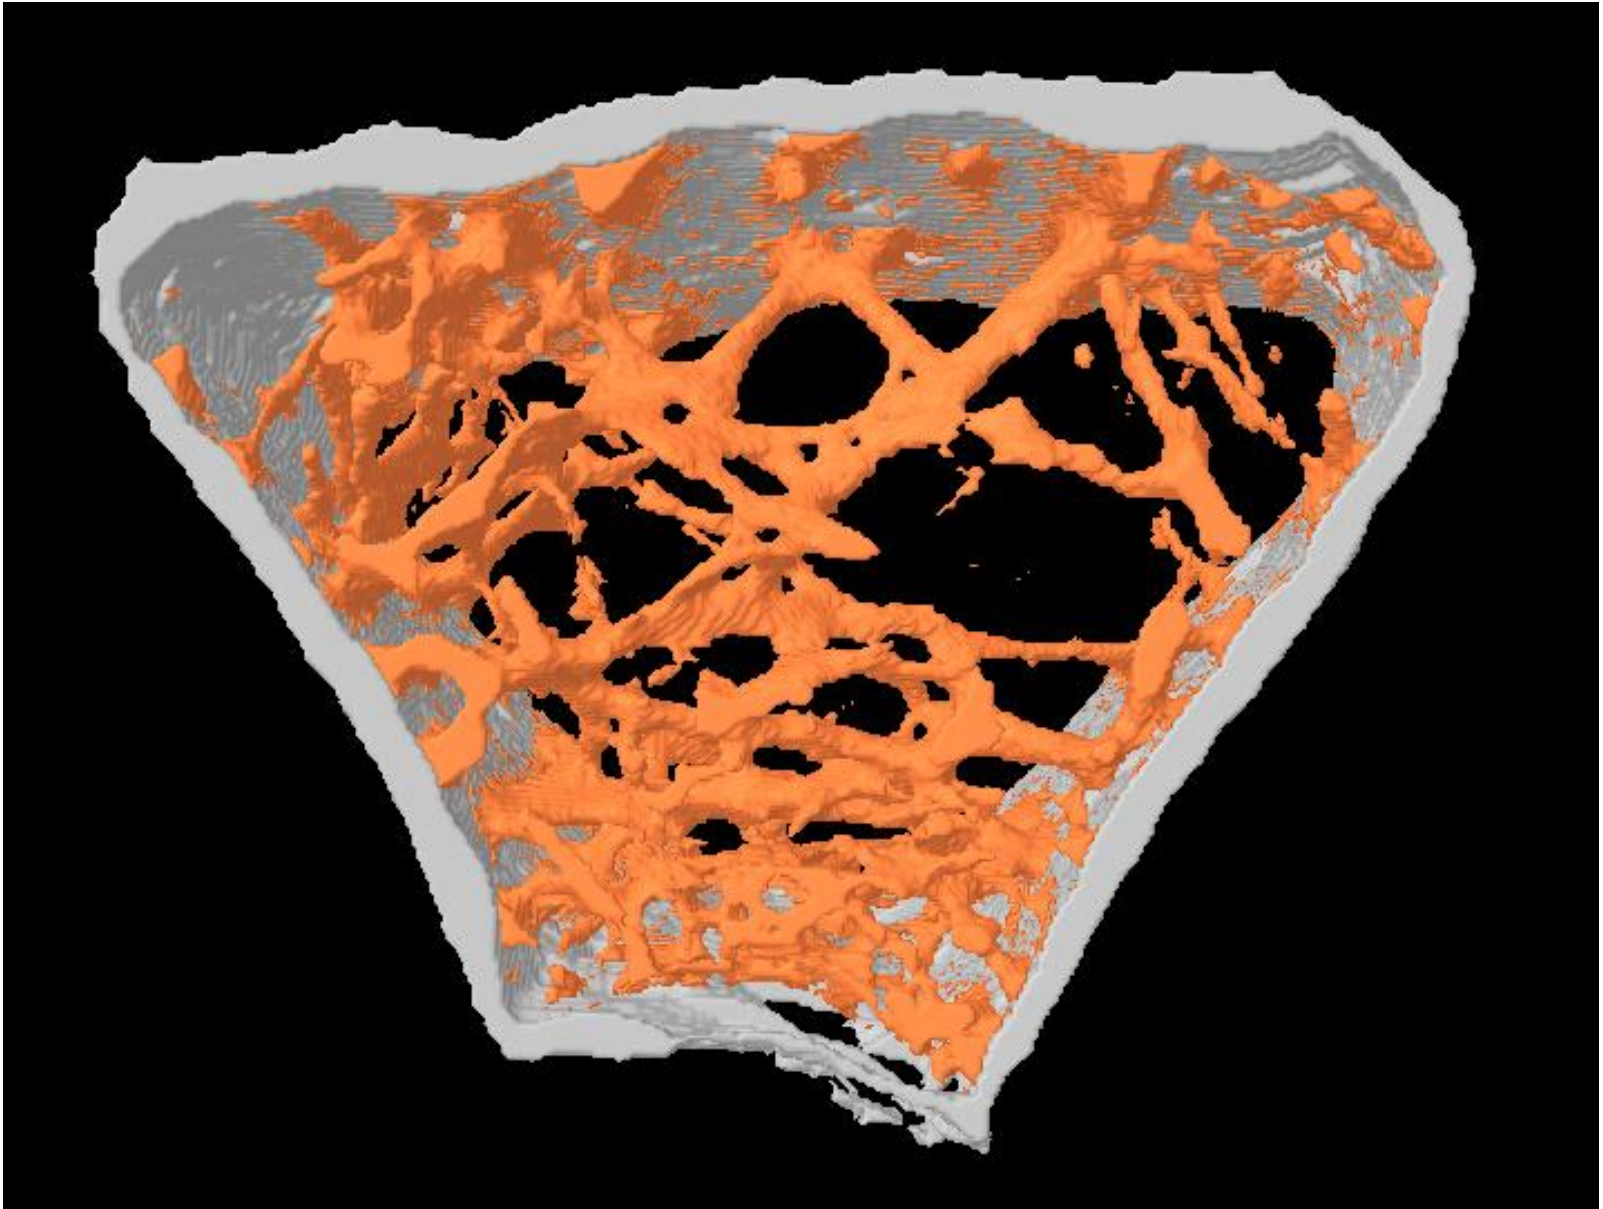

# Evaluation of bone mineral density and new bone formation in ovariectomized mice

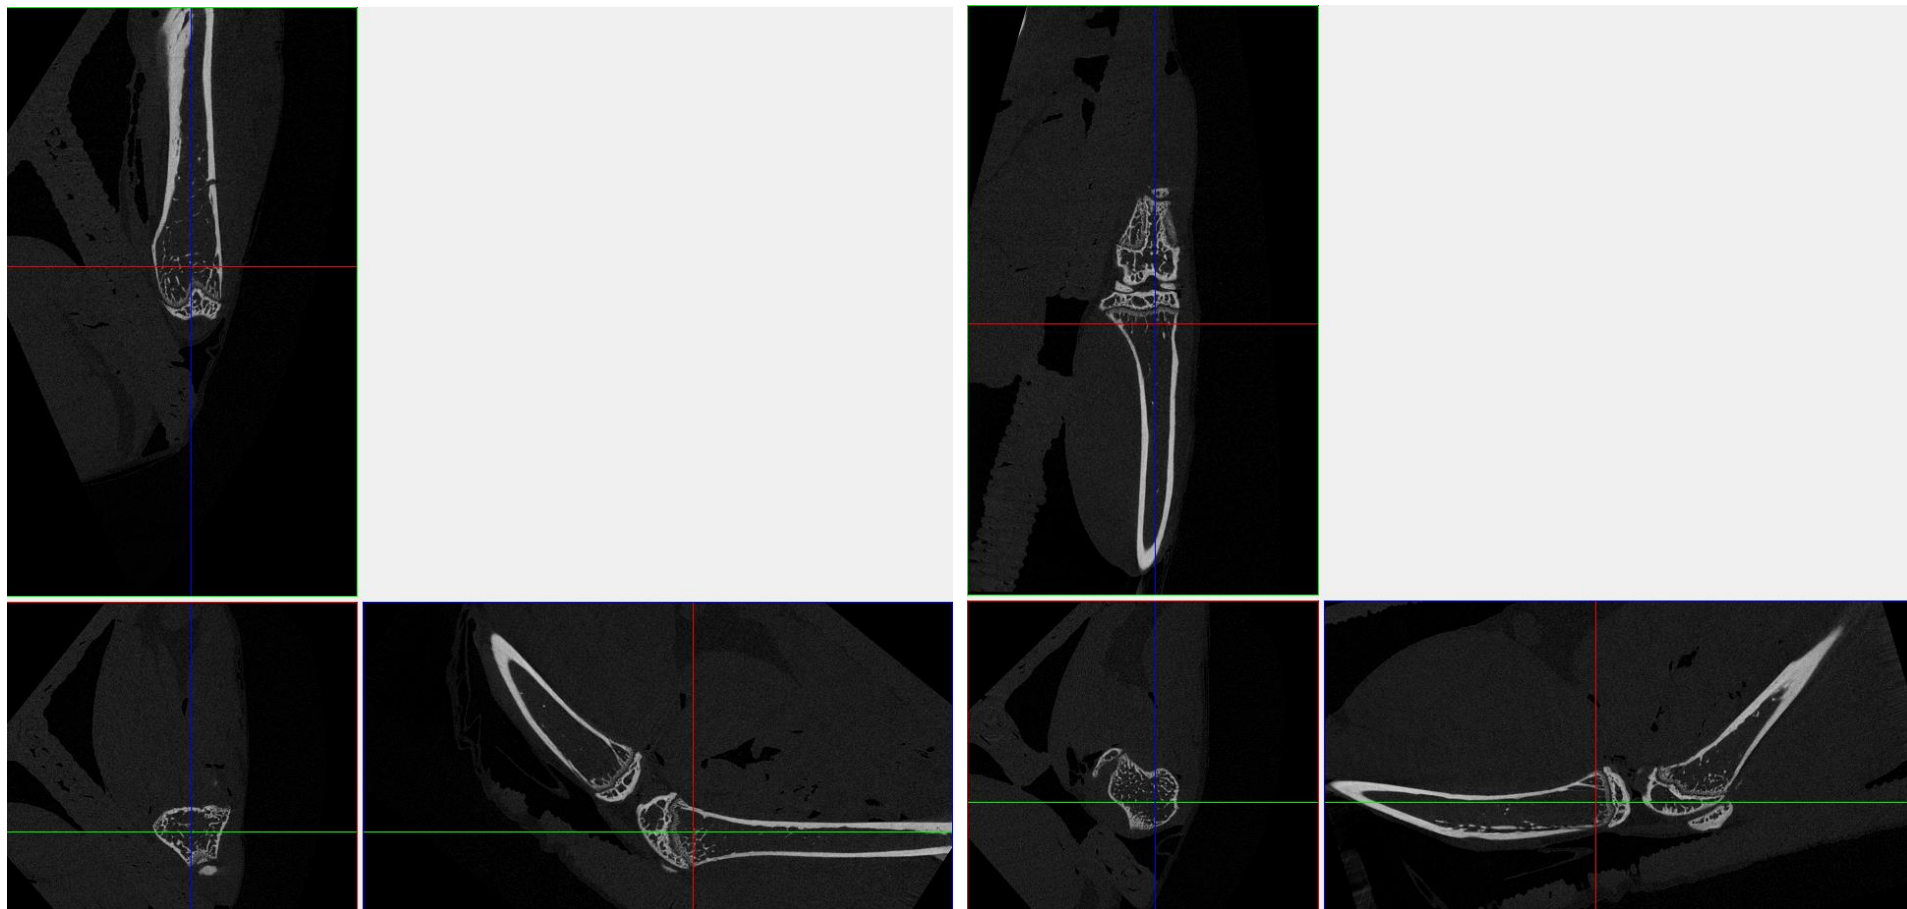

## Evaluation of bone mineral density and new bone formation in ovariectomized mice

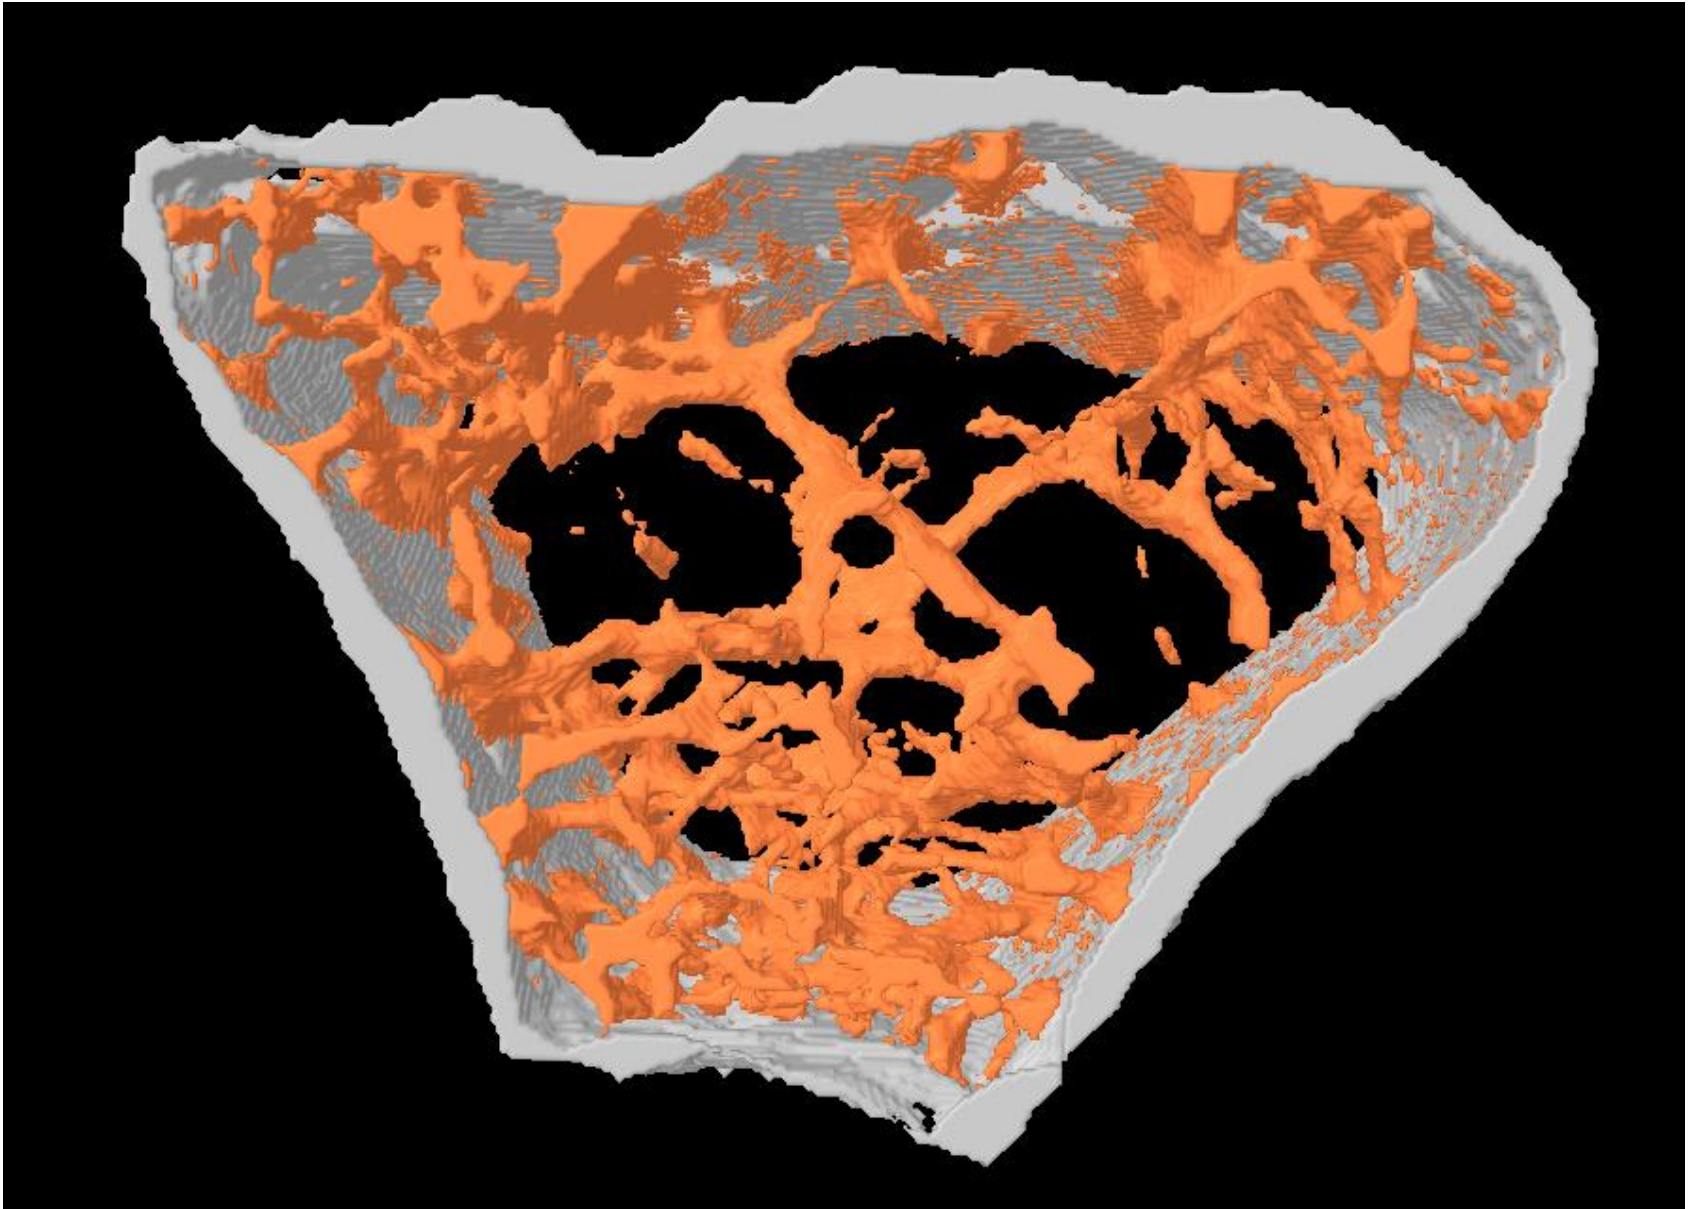



# Evaluation of bone mineral density and new bone formation in ovariectomized mice

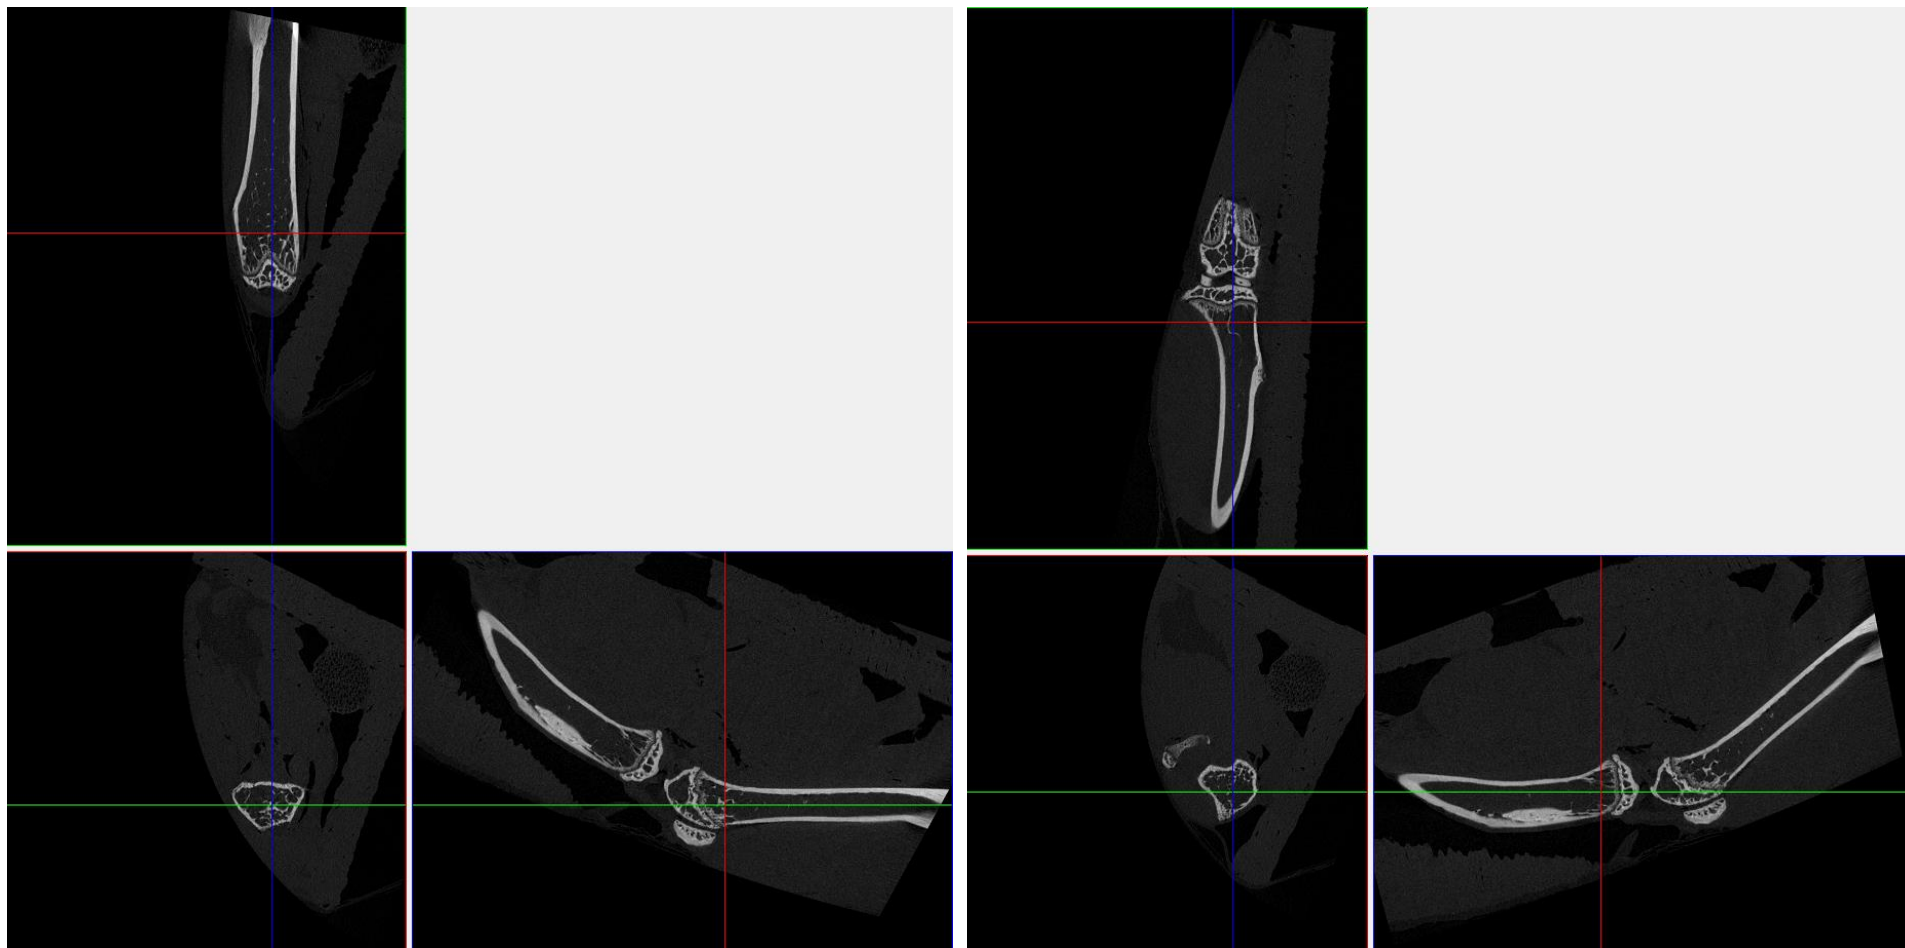



## Evaluation of bone mineral density and new bone formation in ovariectomized mice

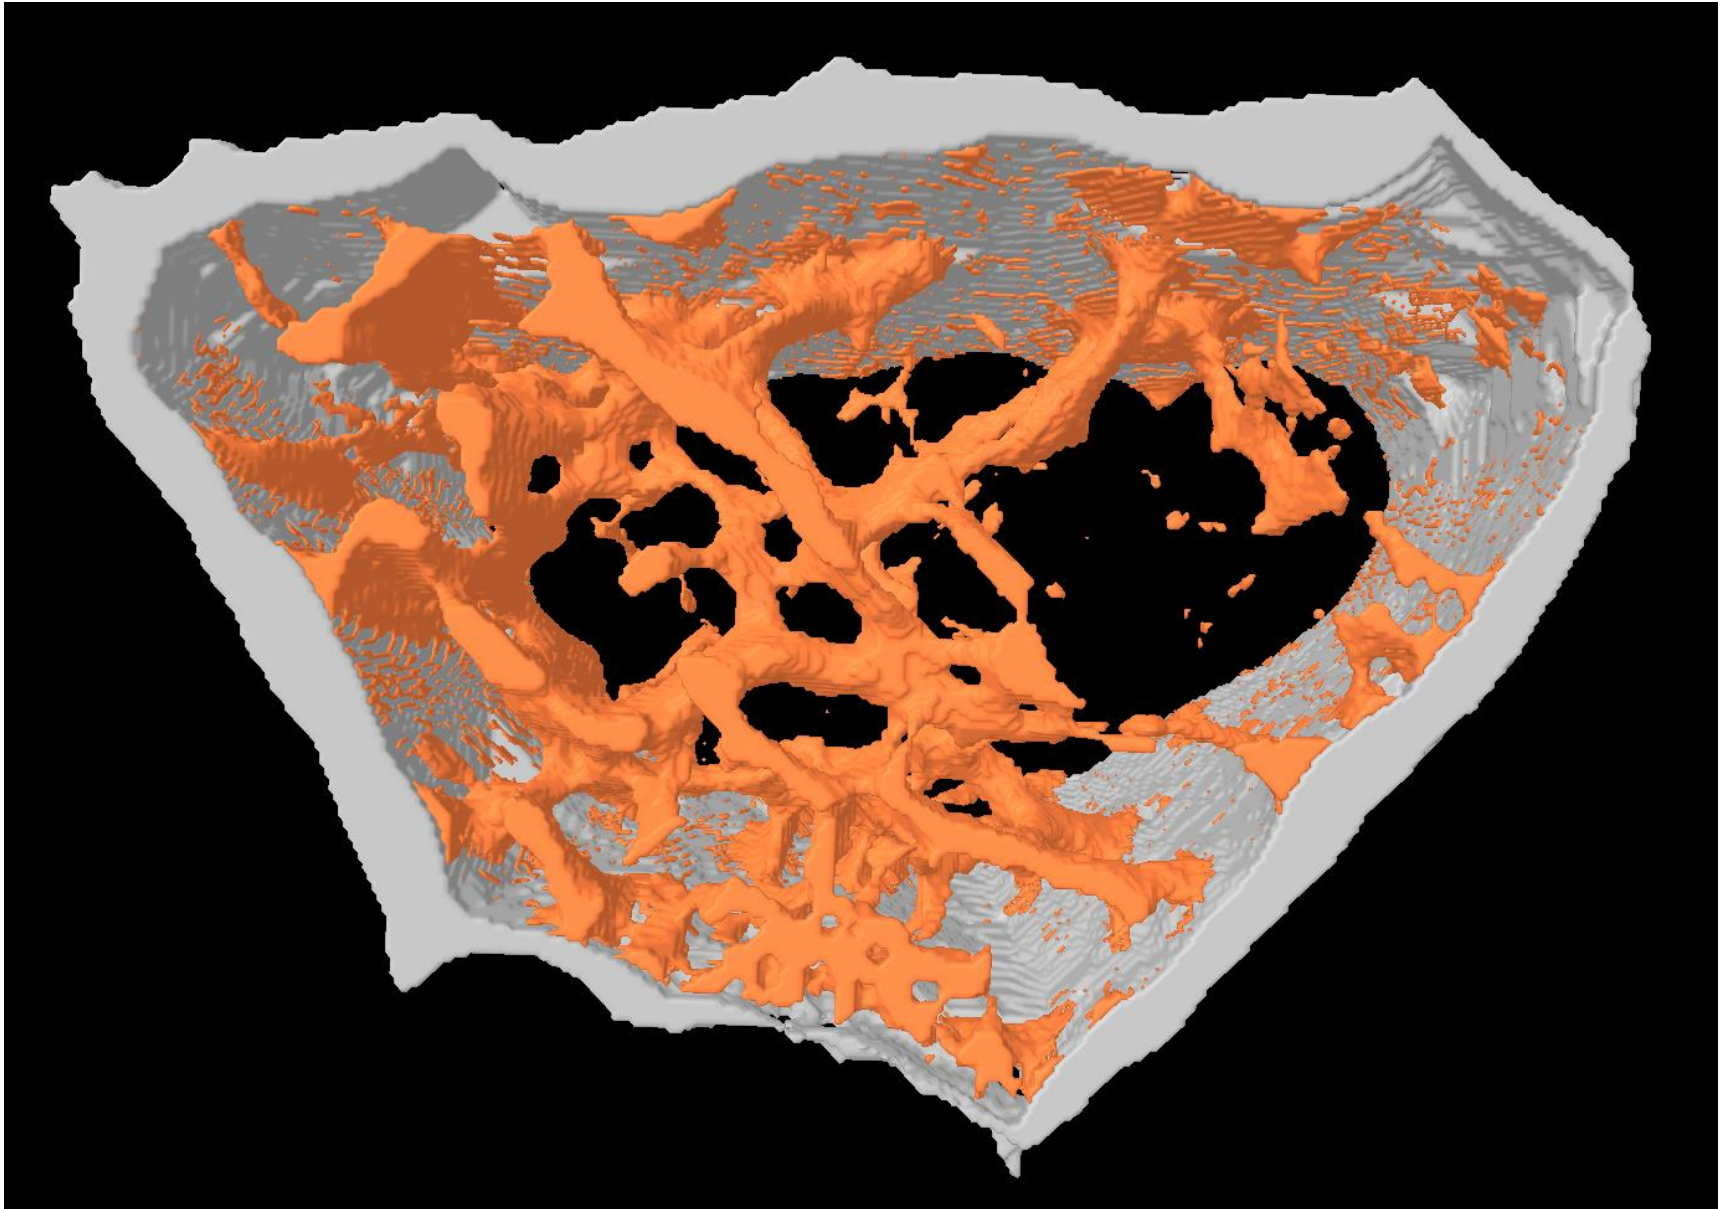

# Evaluation of bone mineral density and new bone formation in ovariectomized mice

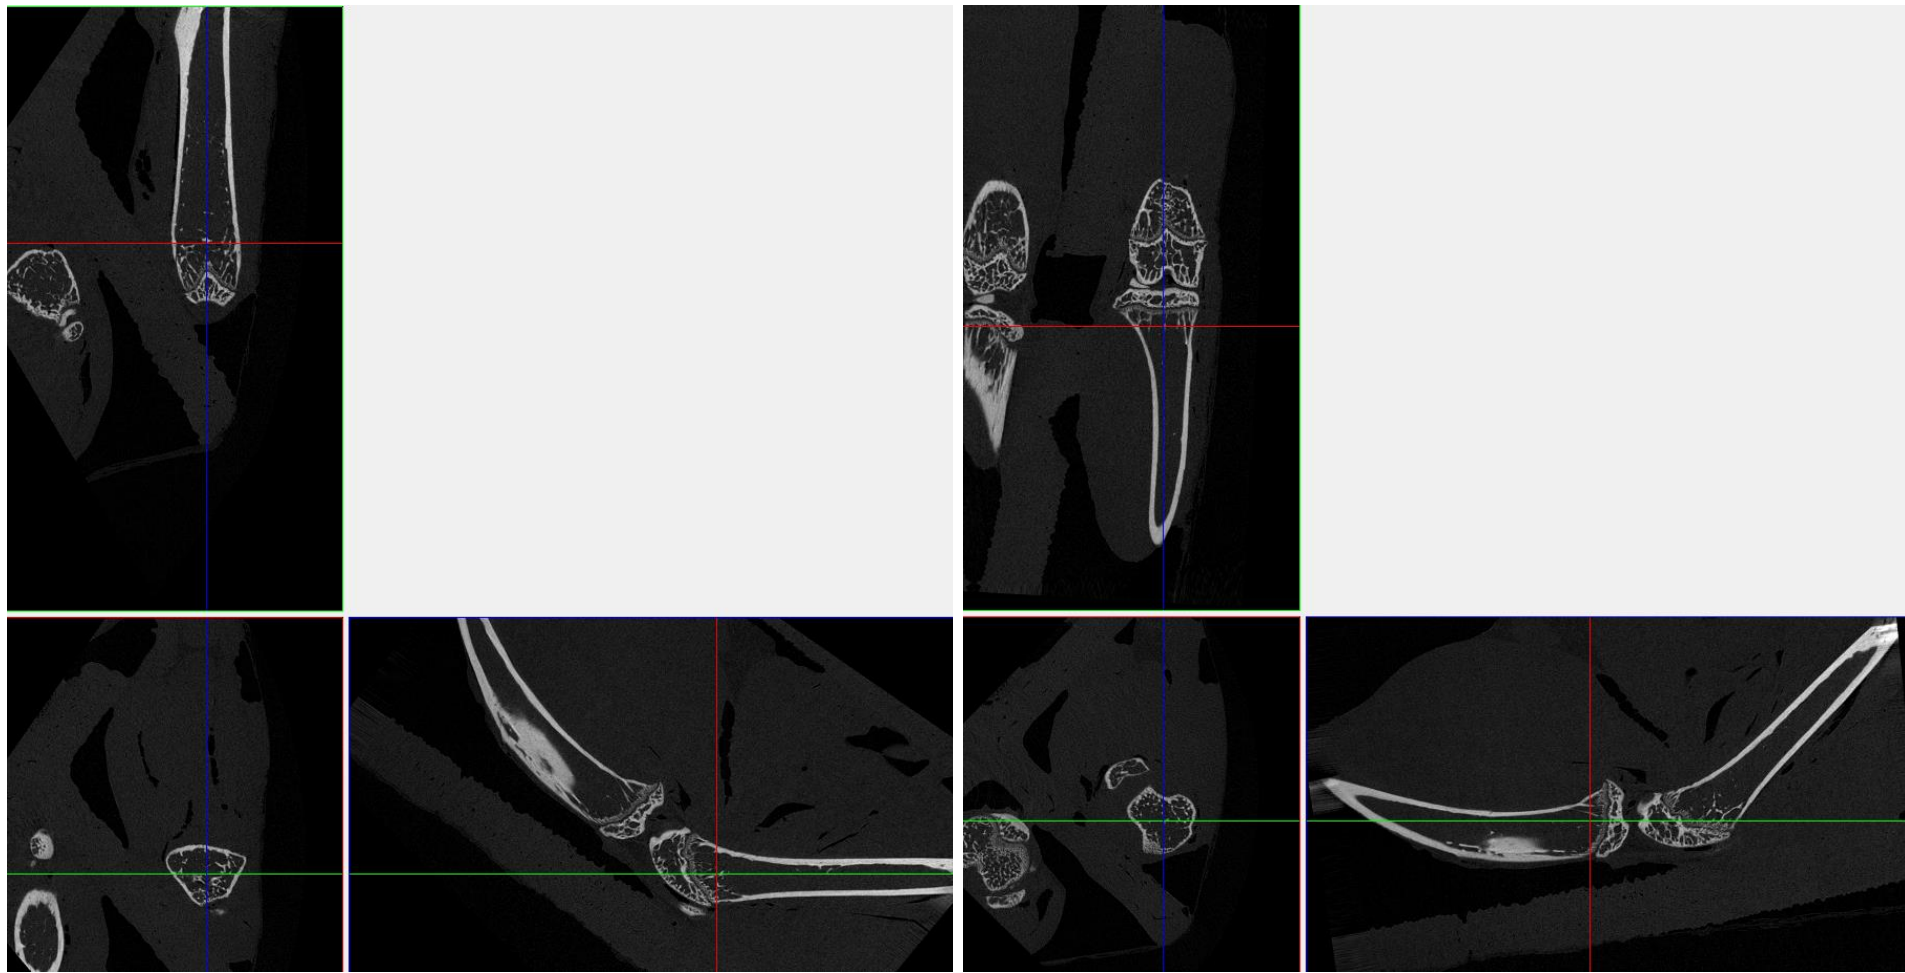

# Evaluation of bone mineral density and new bone formation in ovariectomized mice

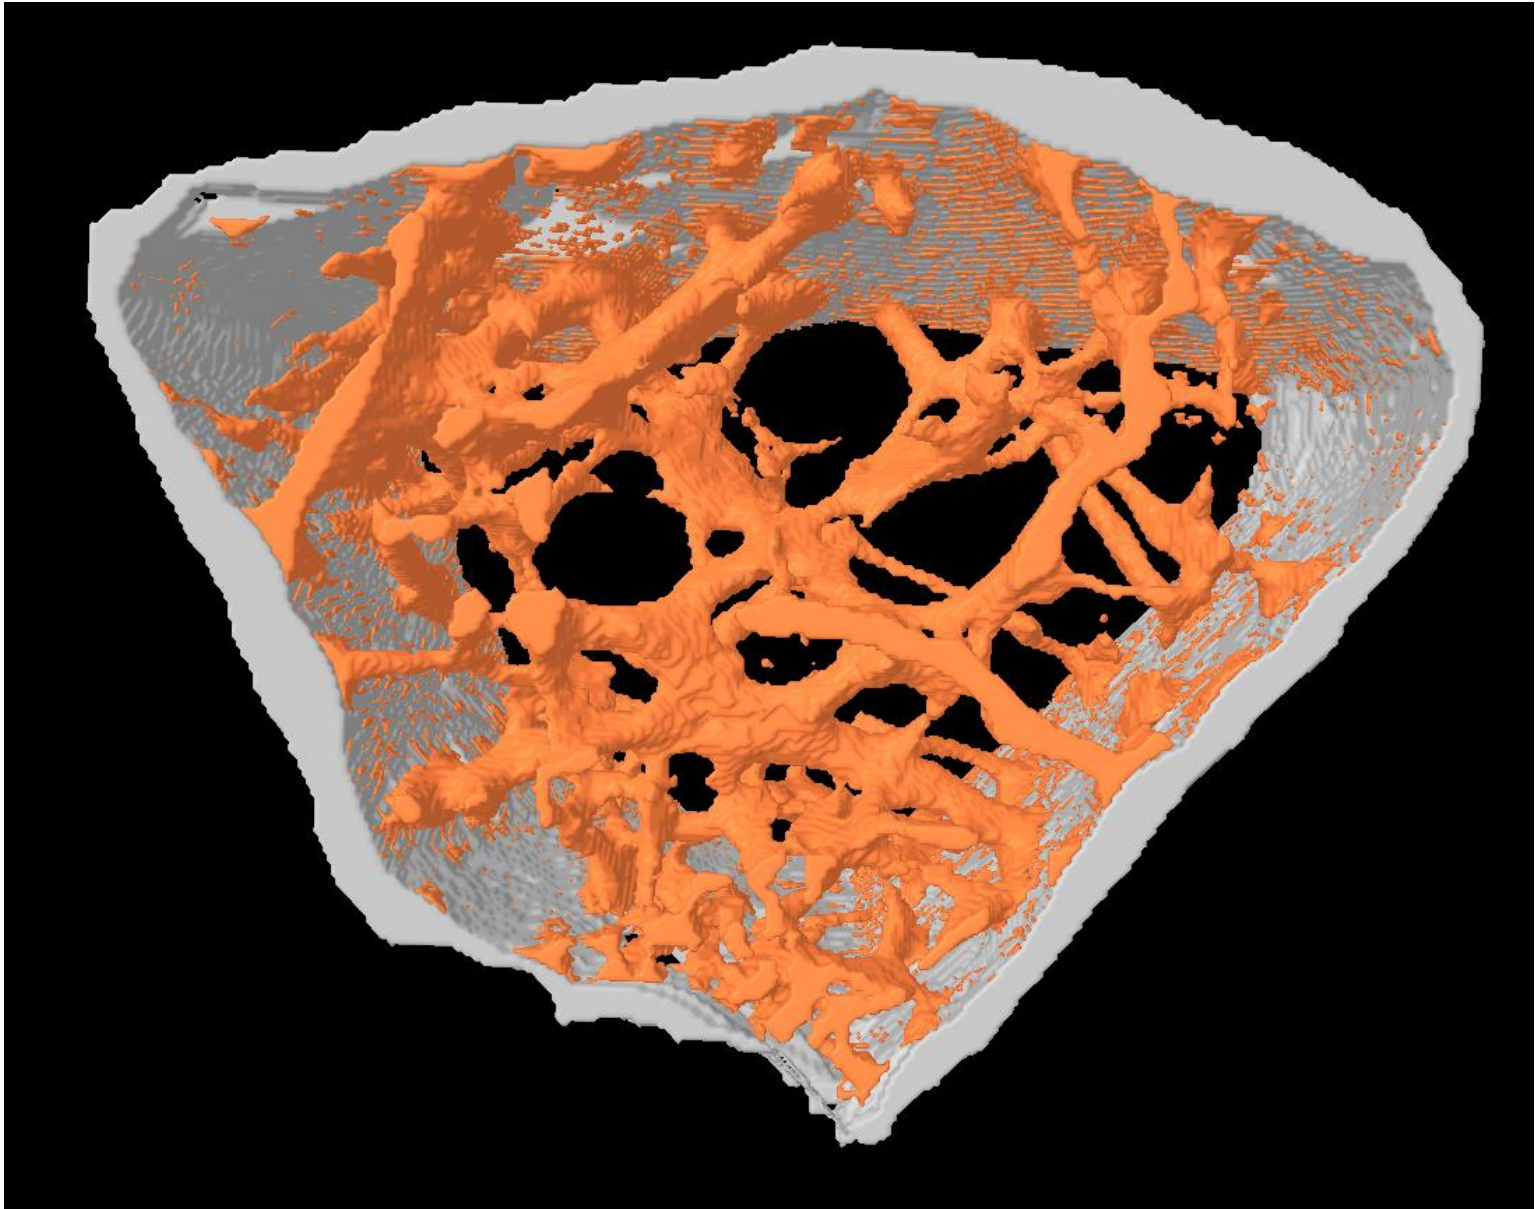



# Evaluation of bone mineral density and new bone formation in ovariectomized mice

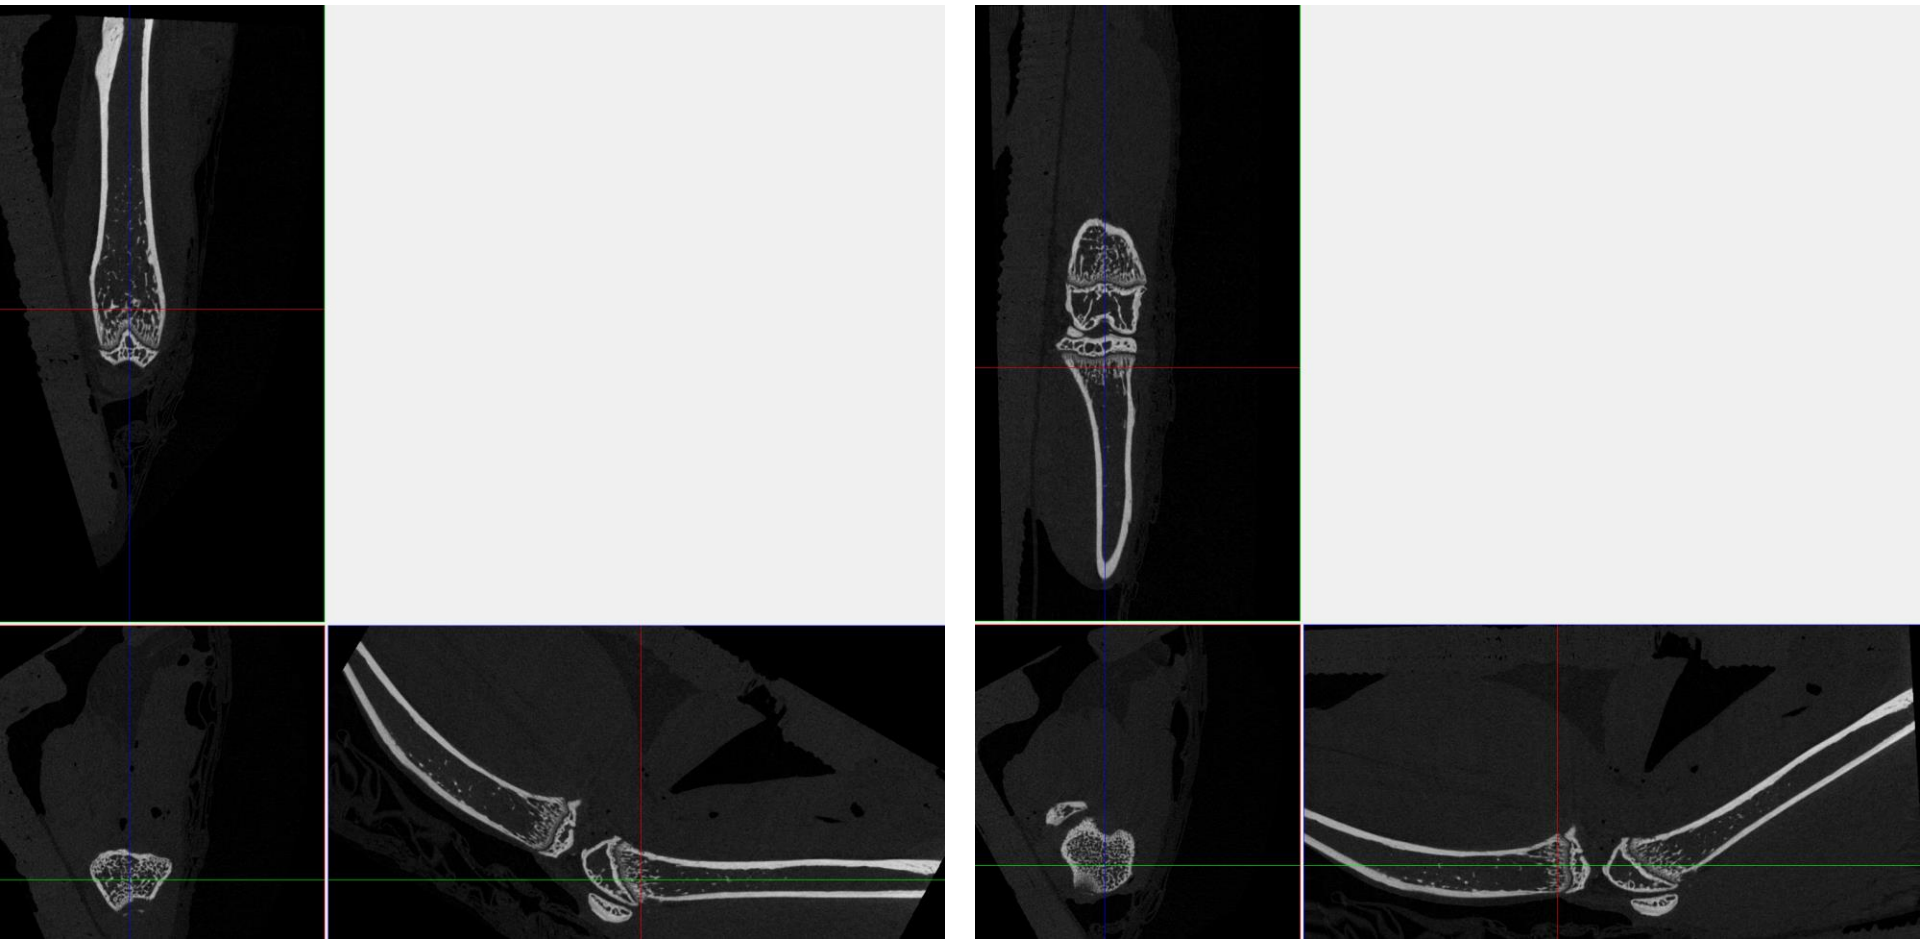



# Evaluation of bone mineral density and new bone formation in ovariectomized mice

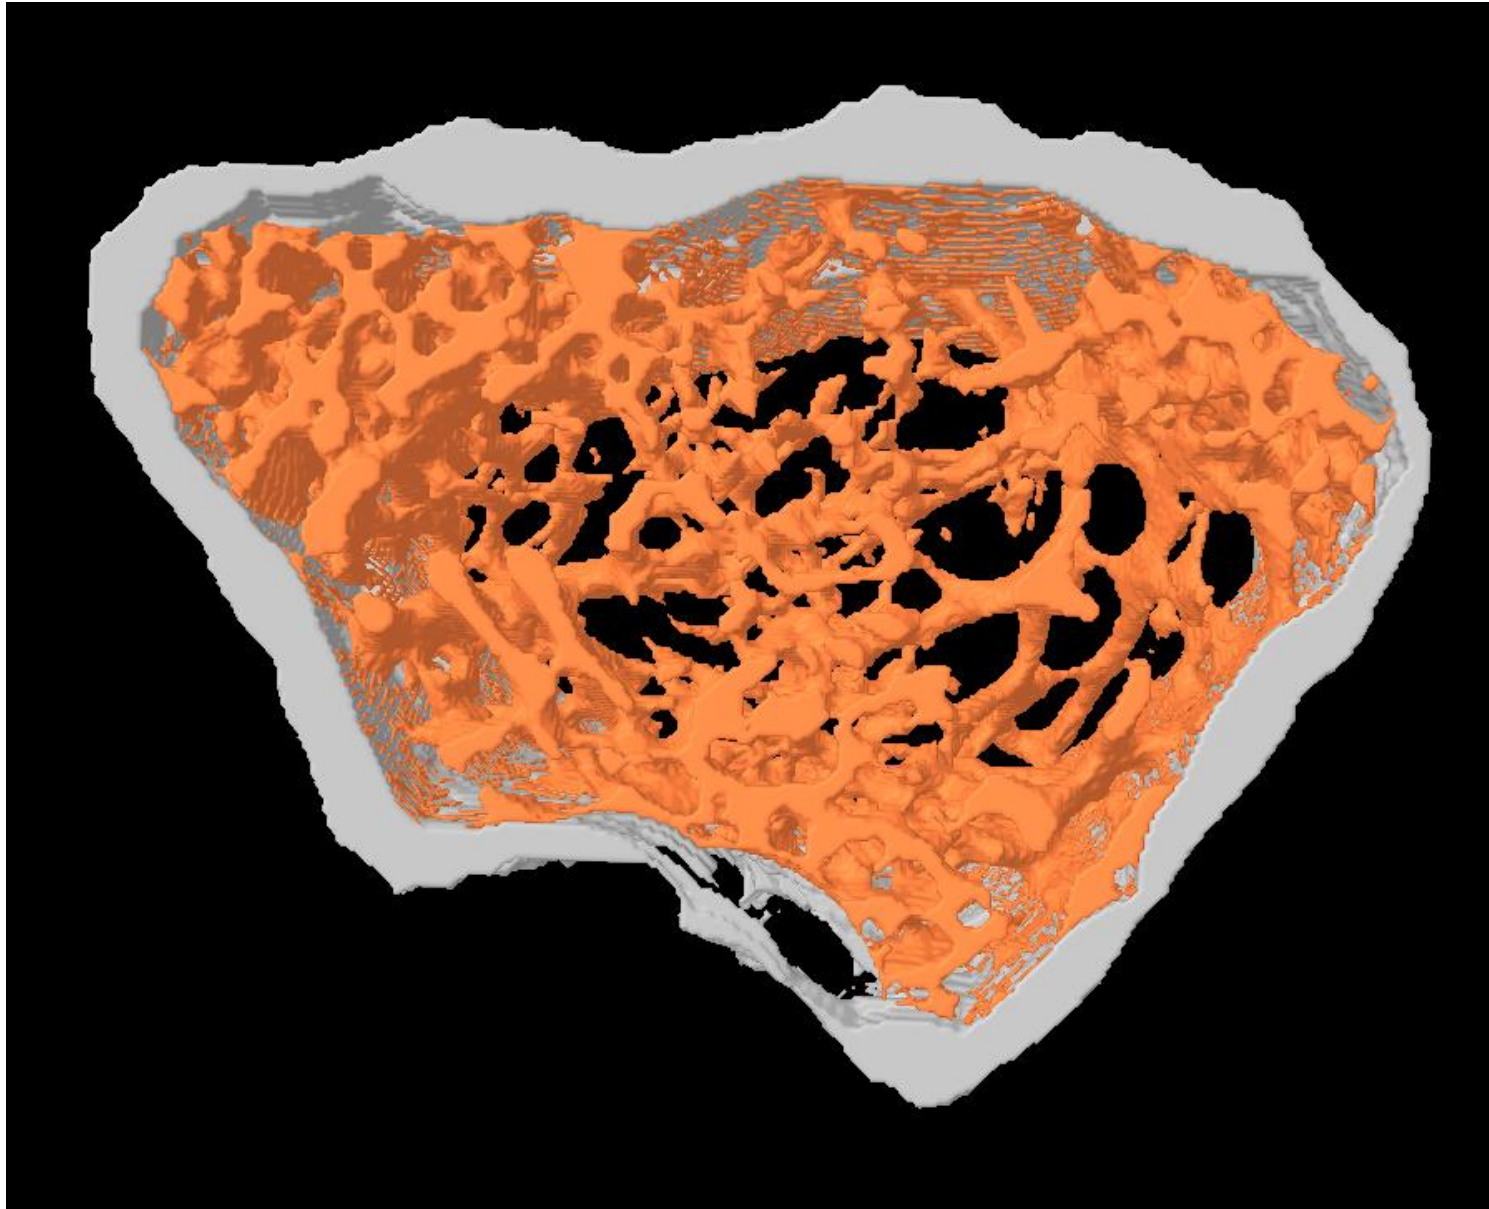

# Evaluation of bone mineral density and new bone formation in ovariectomized mice

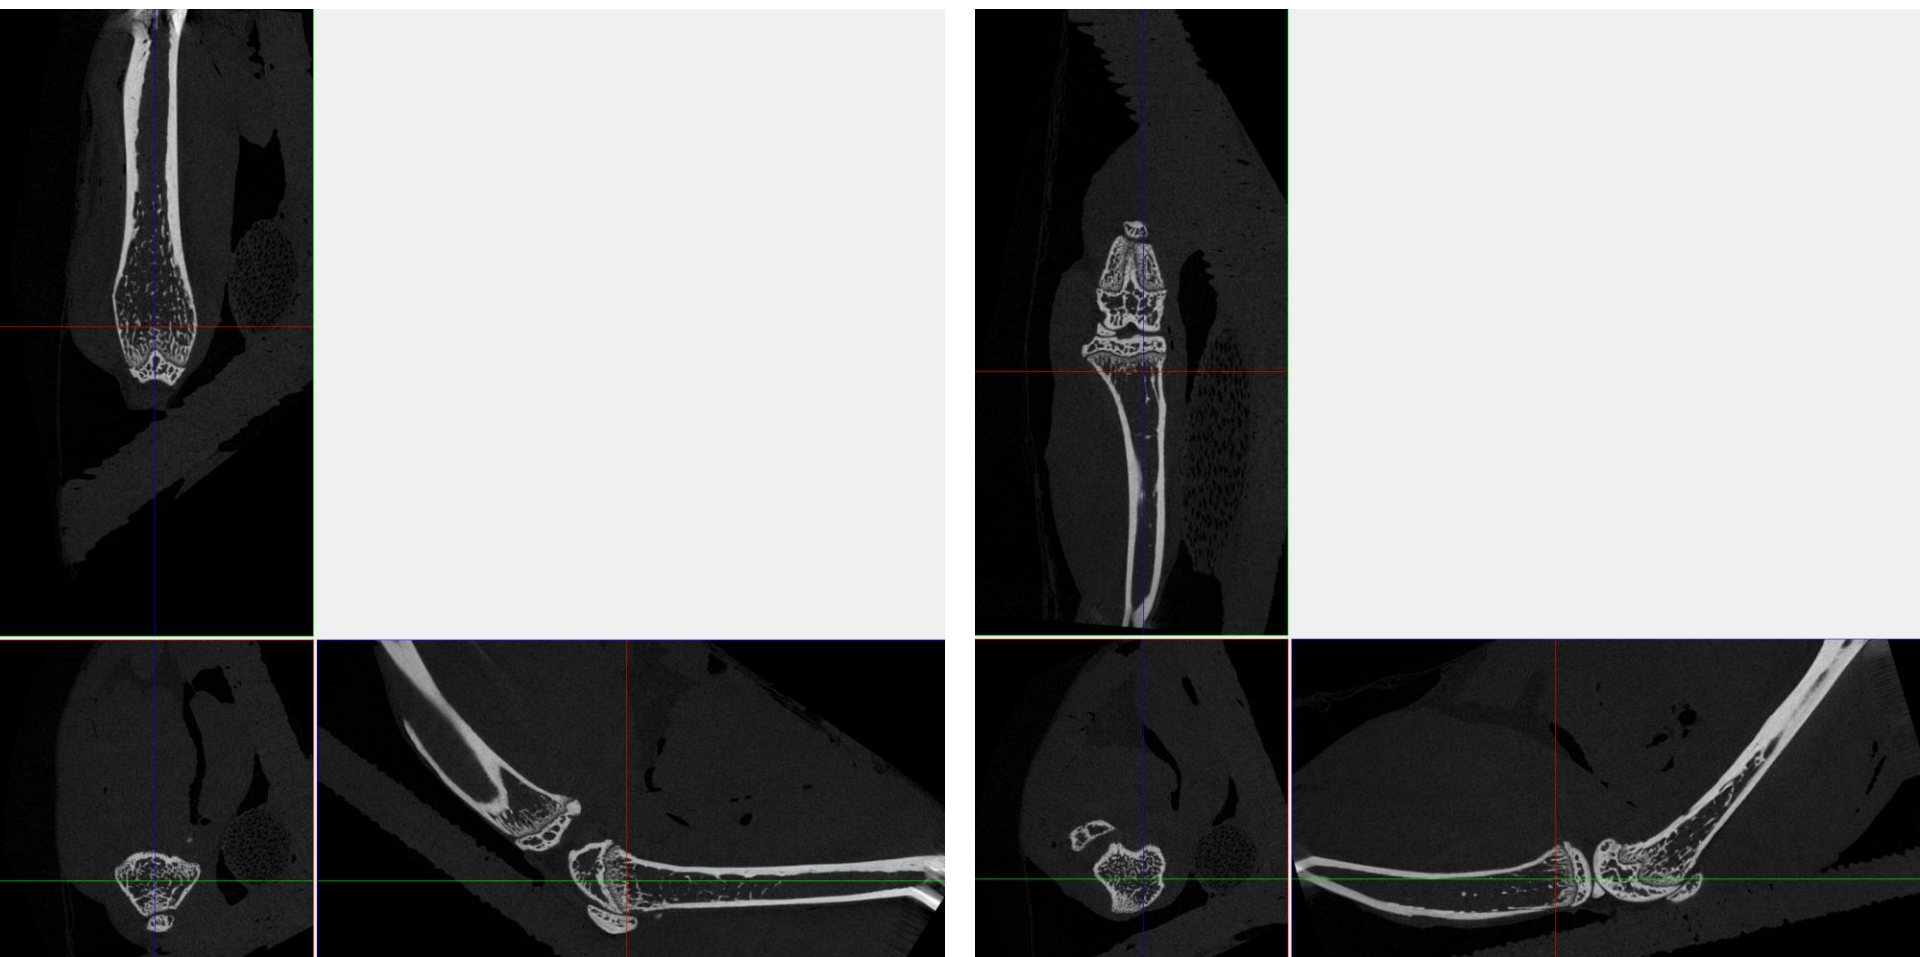

# Evaluation of bone mineral density and new bone formation in ovariectomized mice

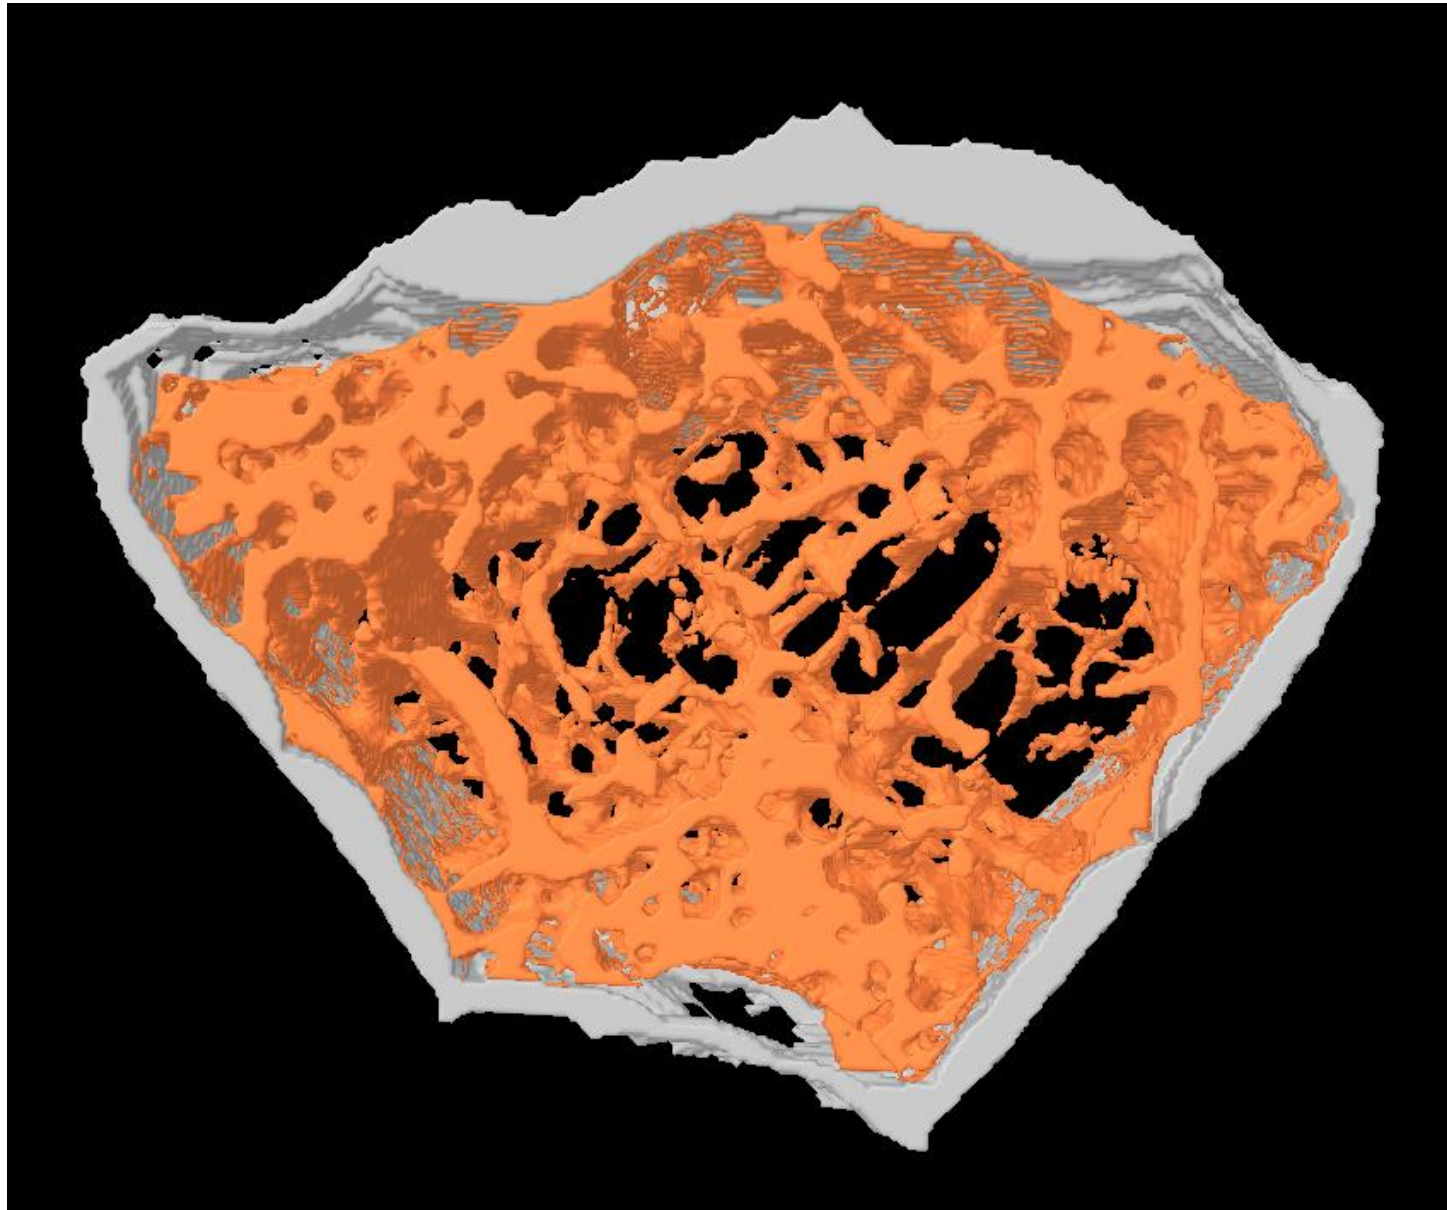

# Evaluation of bone mineral density and new bone formation in ovariectomized mice

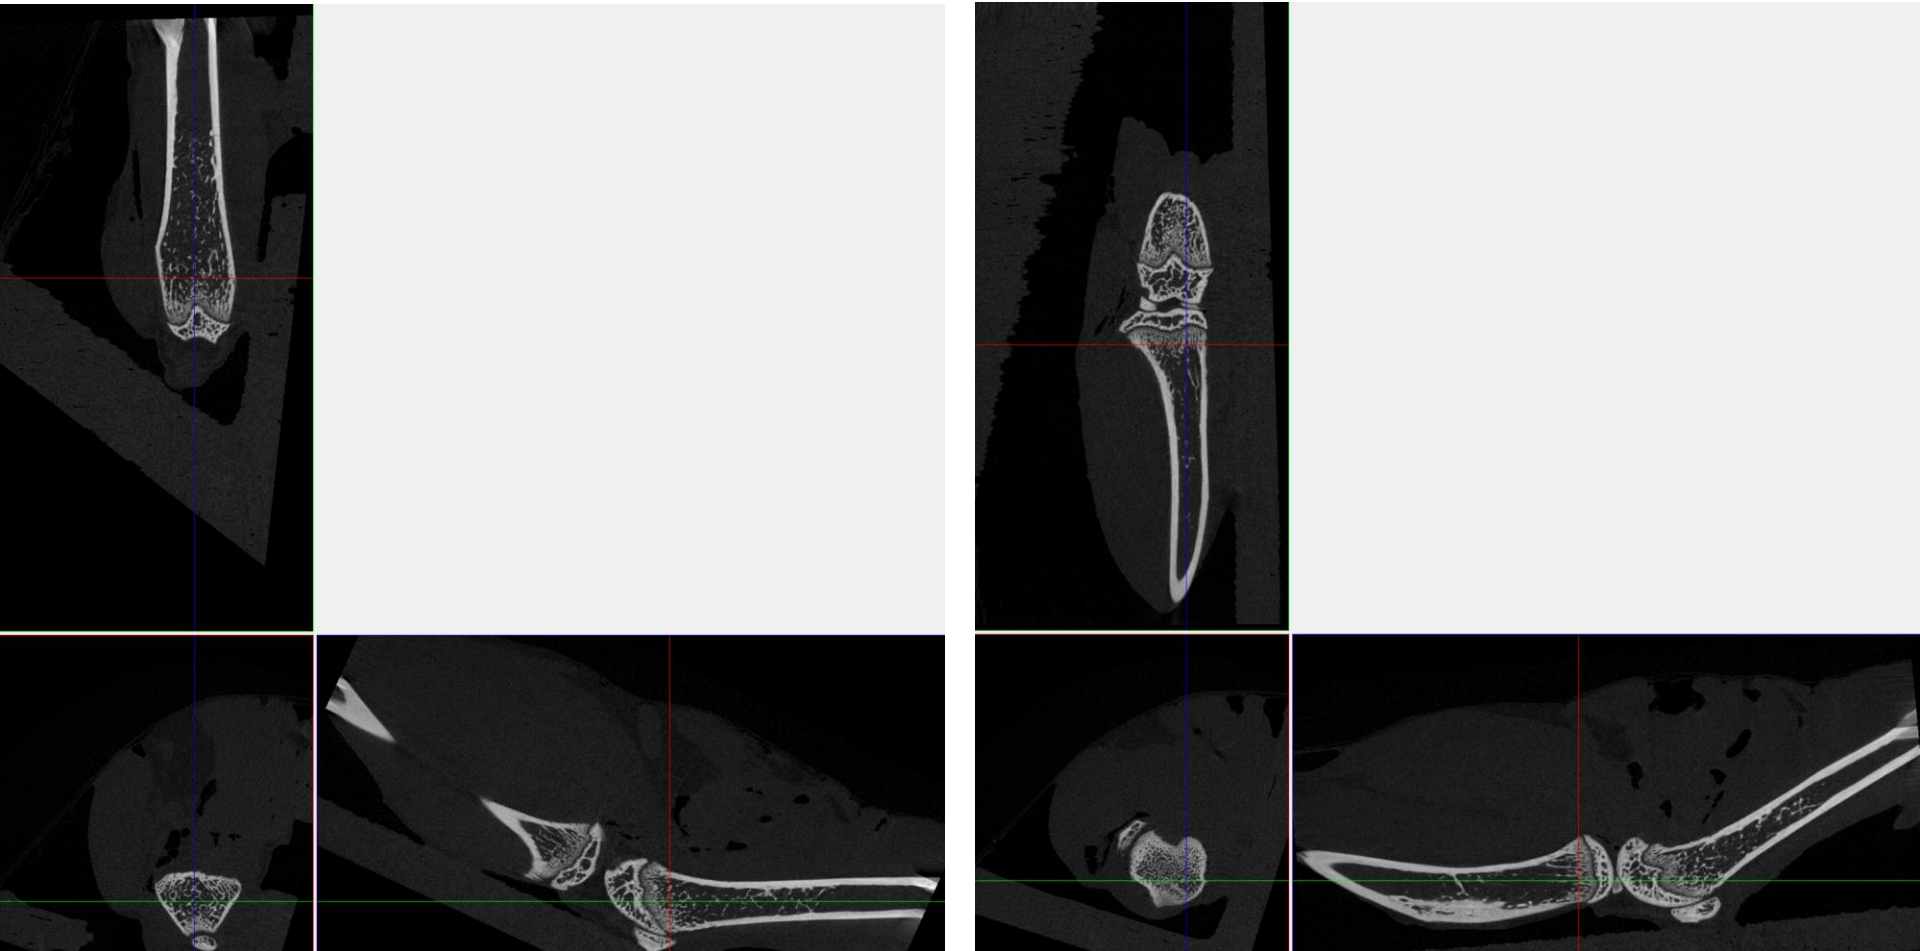



# Evaluation of bone mineral density and new bone formation in ovariectomized mice

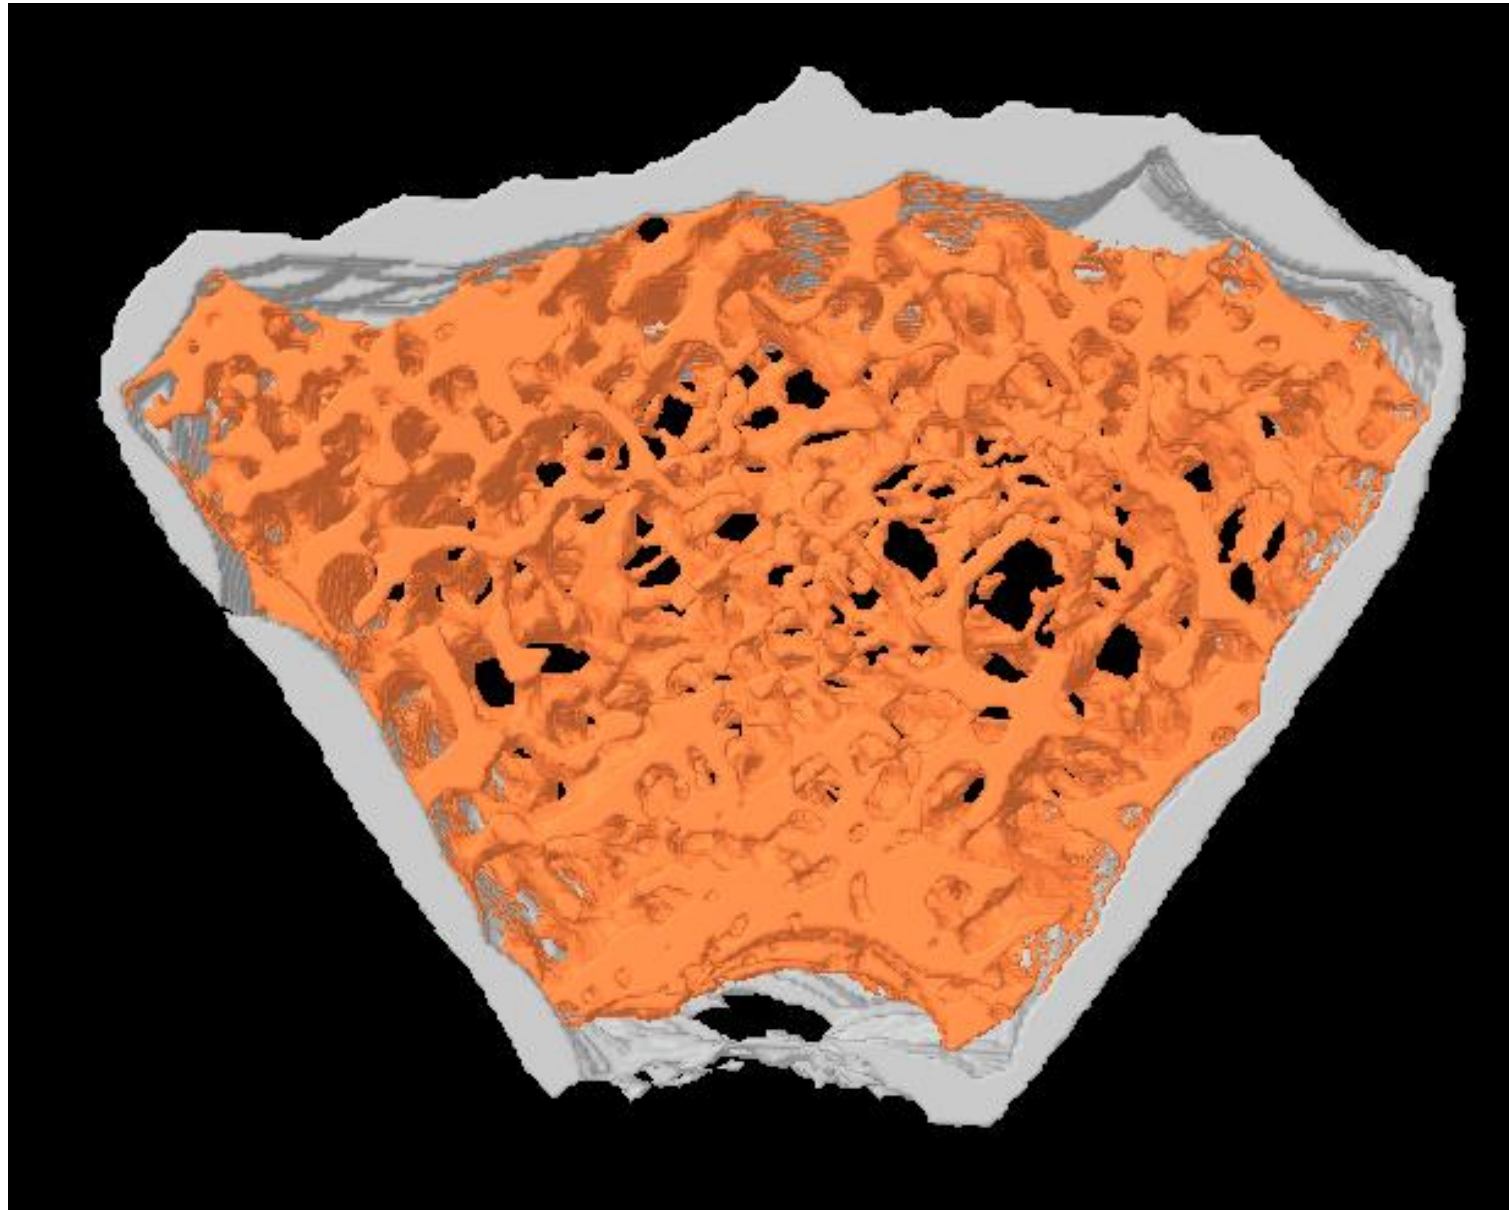

# Evaluation of bone mineral density and new bone formation in ovariectomized mice

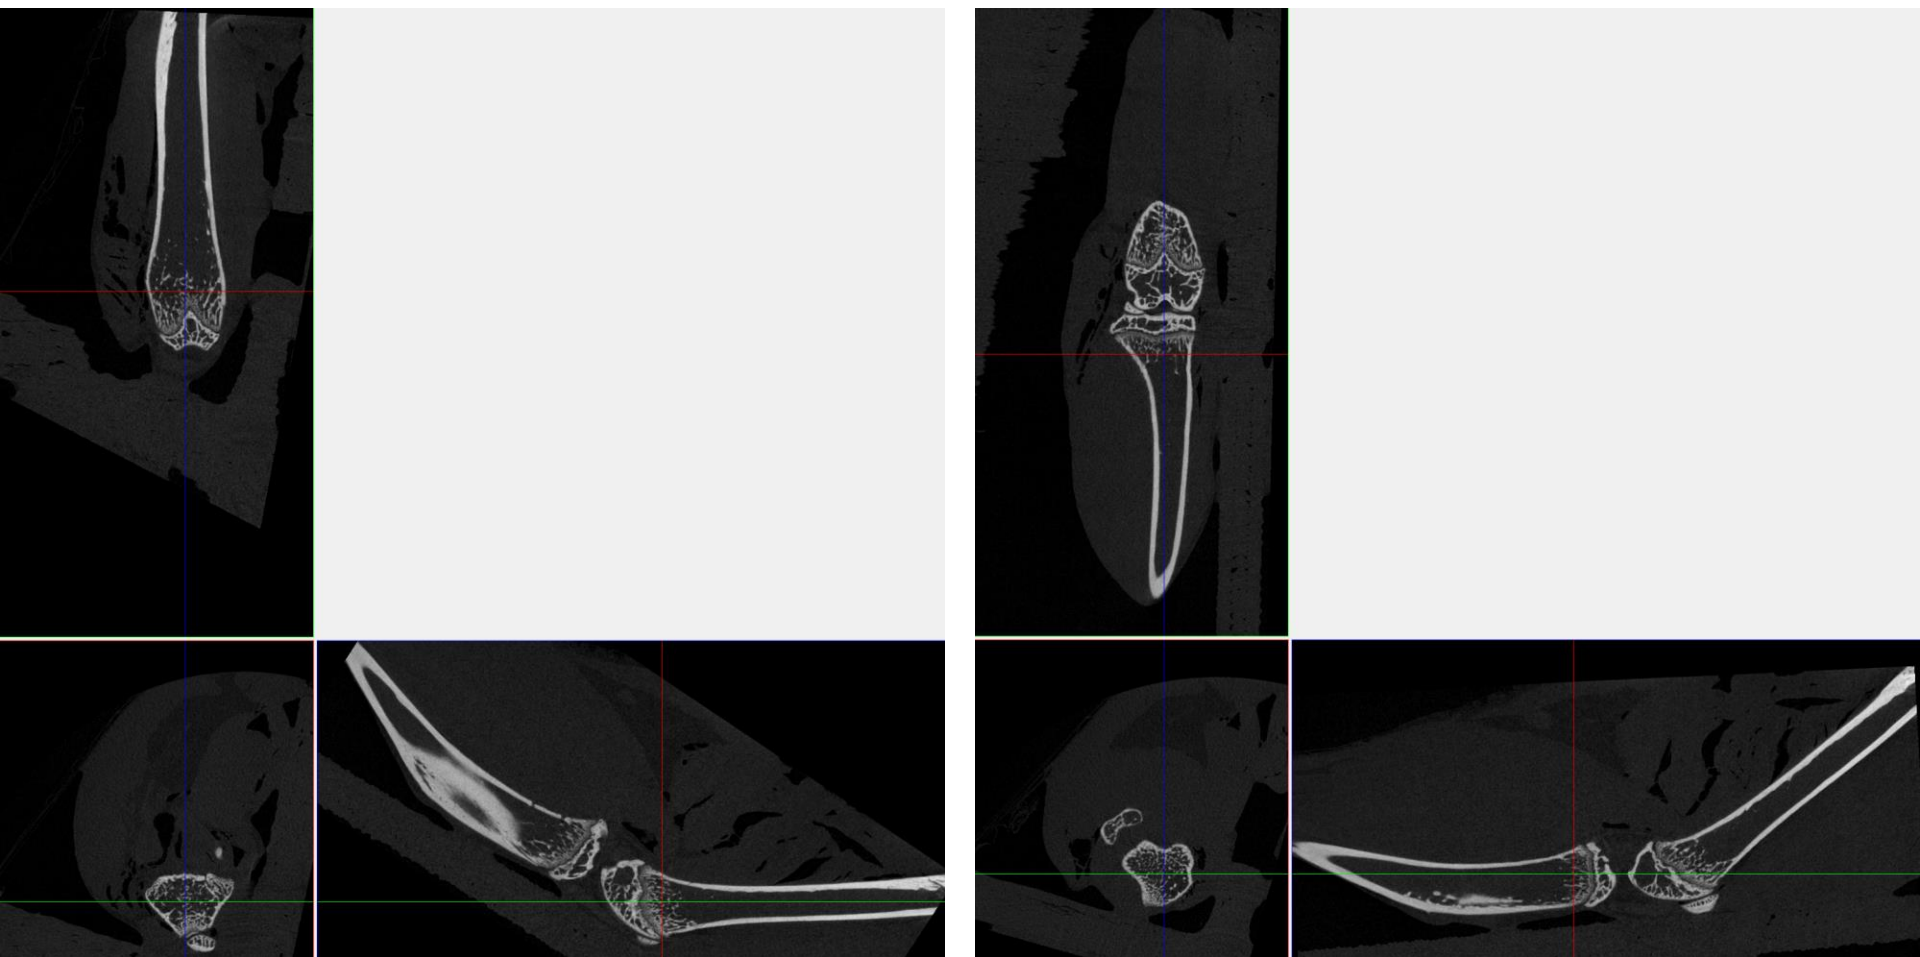

# Evaluation of bone mineral density and new bone formation in ovariectomized mice

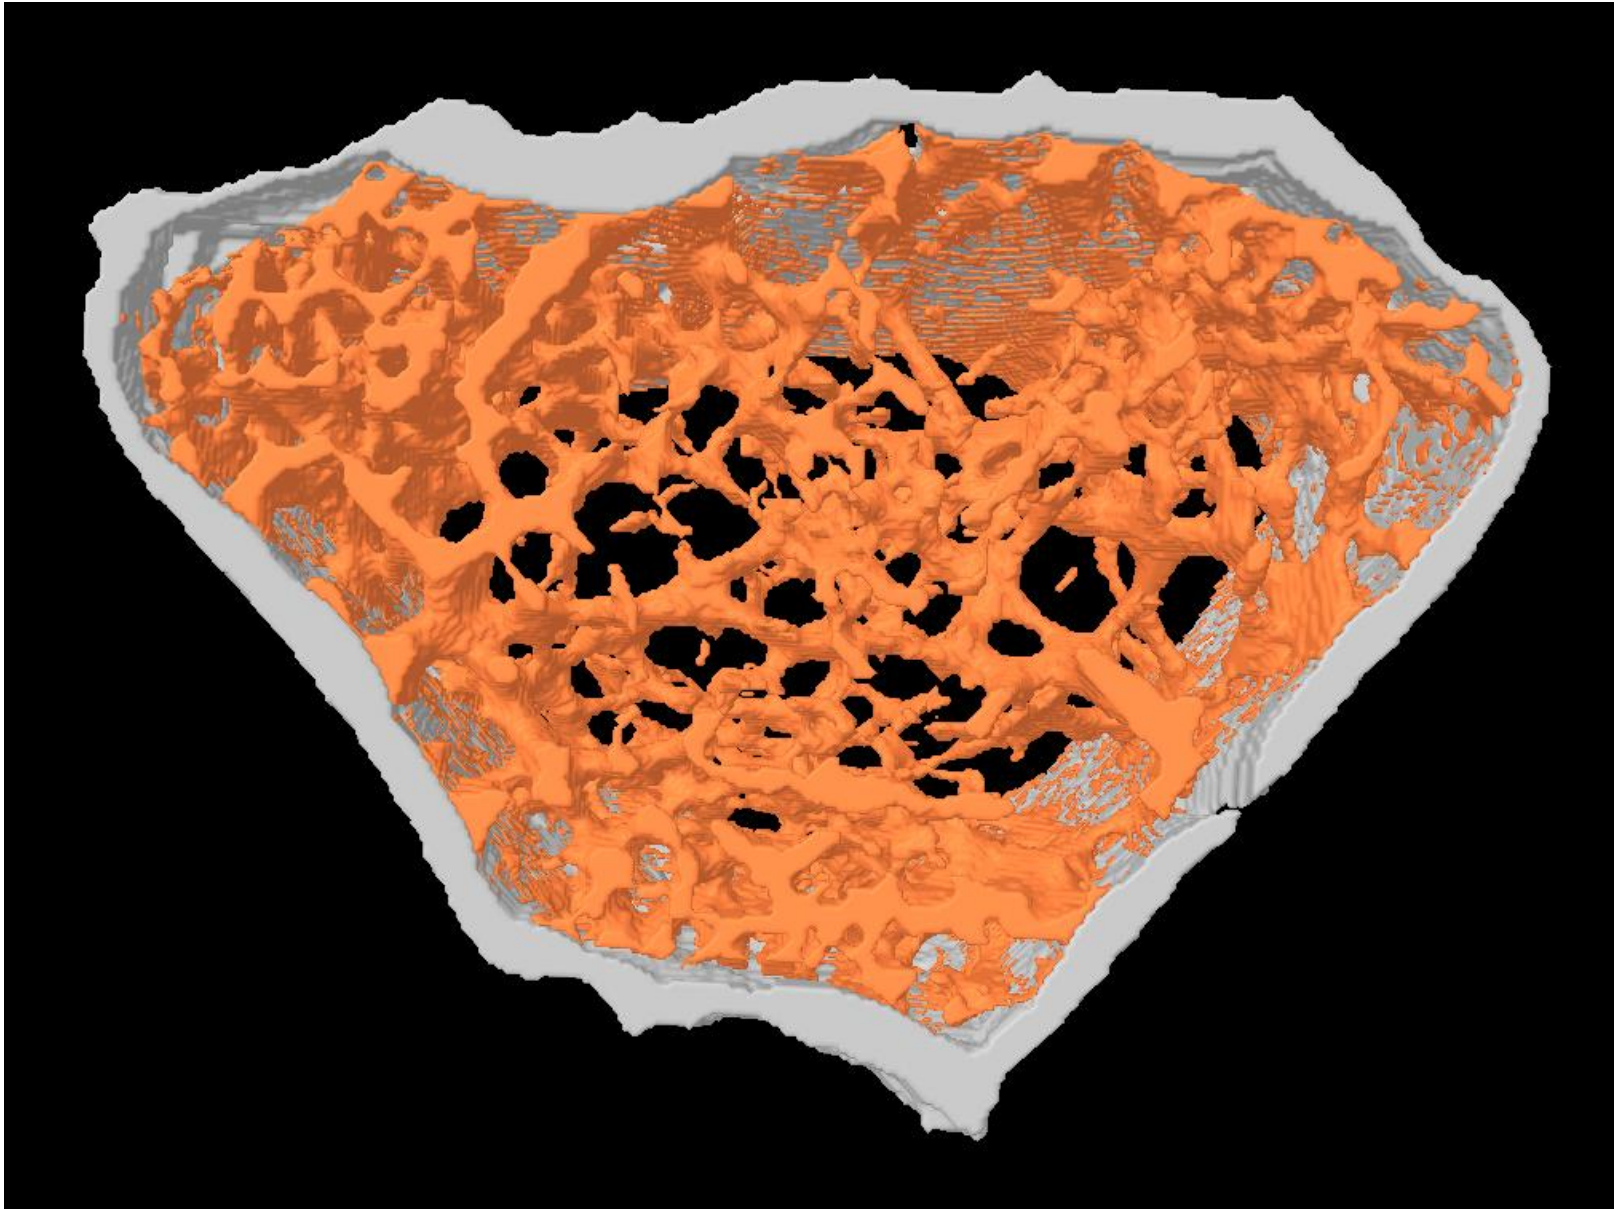

# Evaluation of bone mineral density and new bone formation in ovariectomized mice

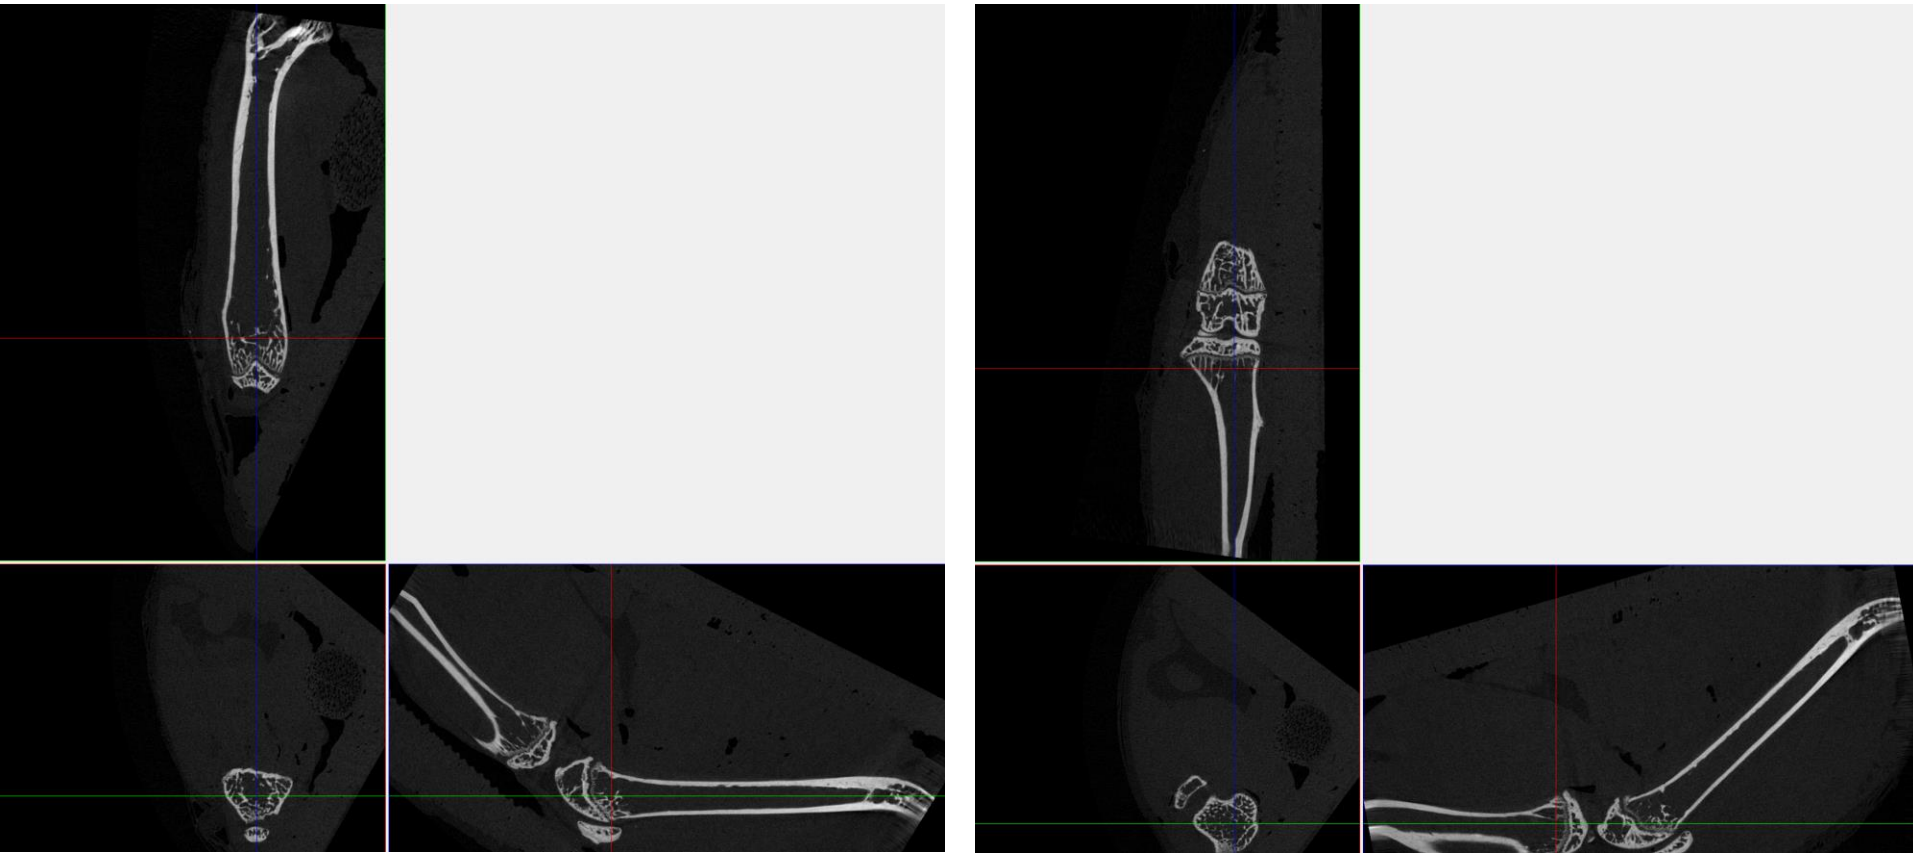



# Evaluation of bone mineral density and new bone formation in ovariectomized mice

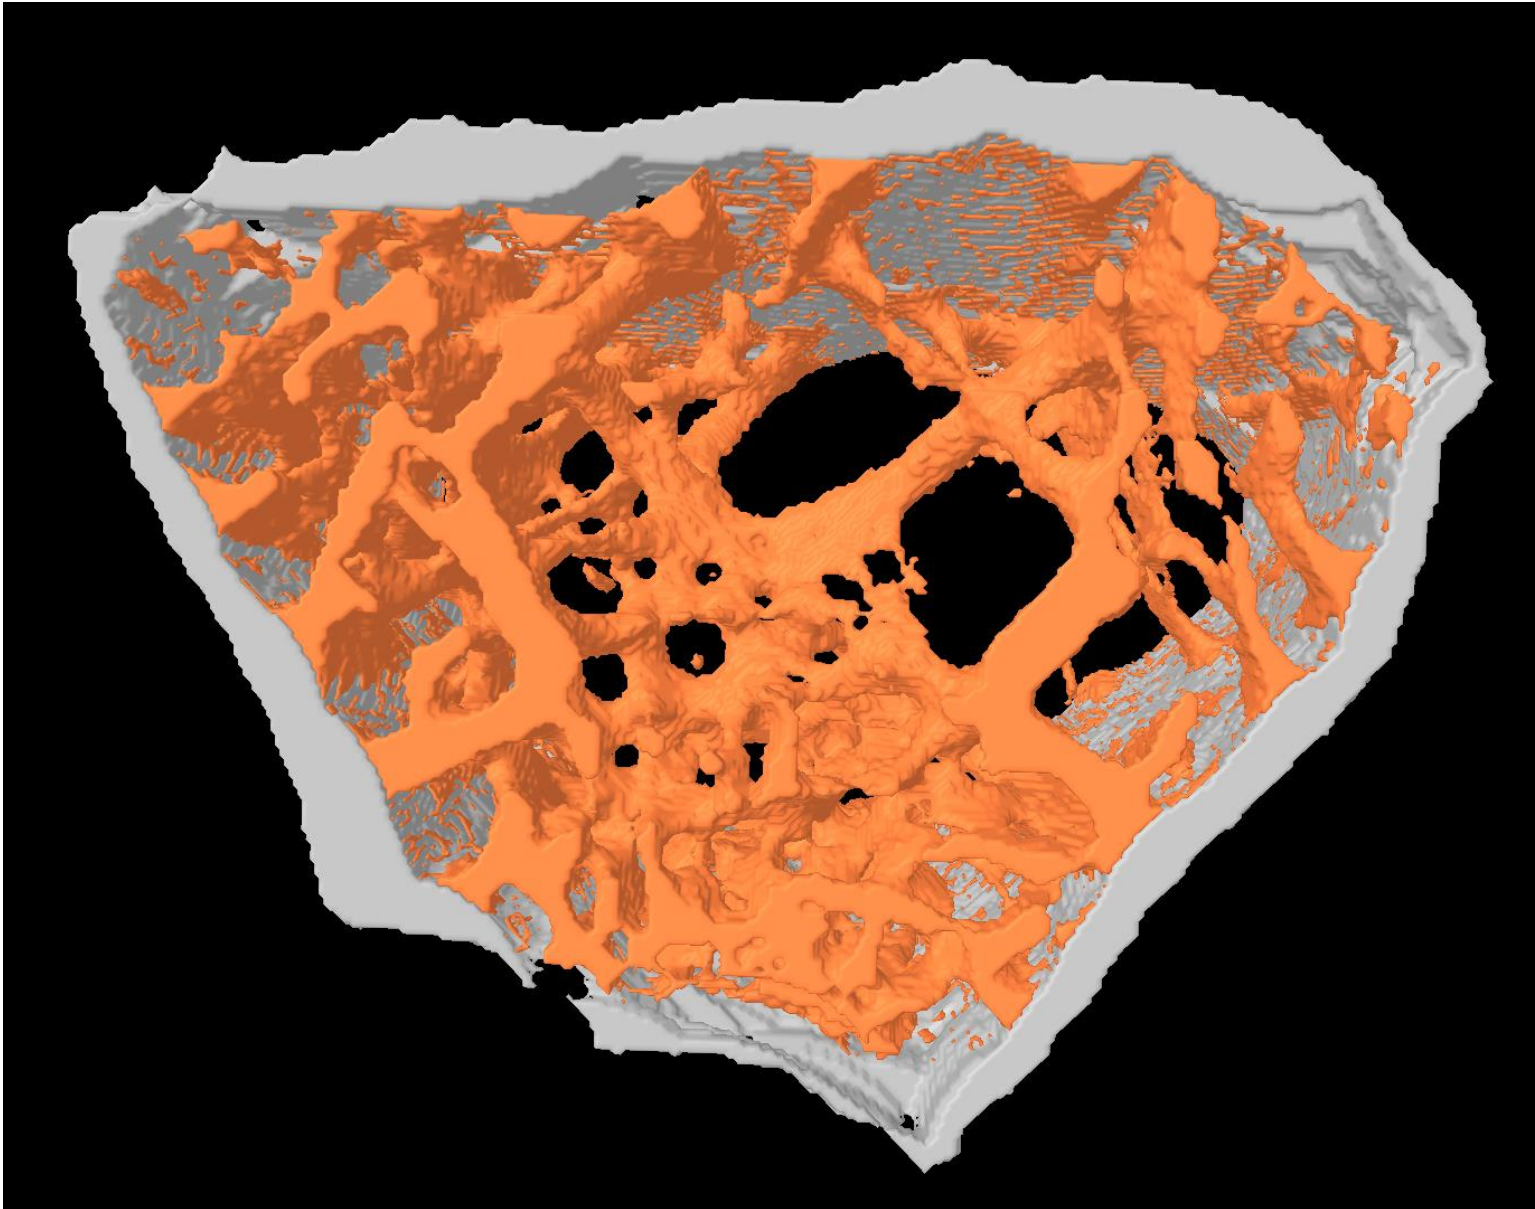

# Evaluation of bone mineral density and new bone formation in ovariectomized mice

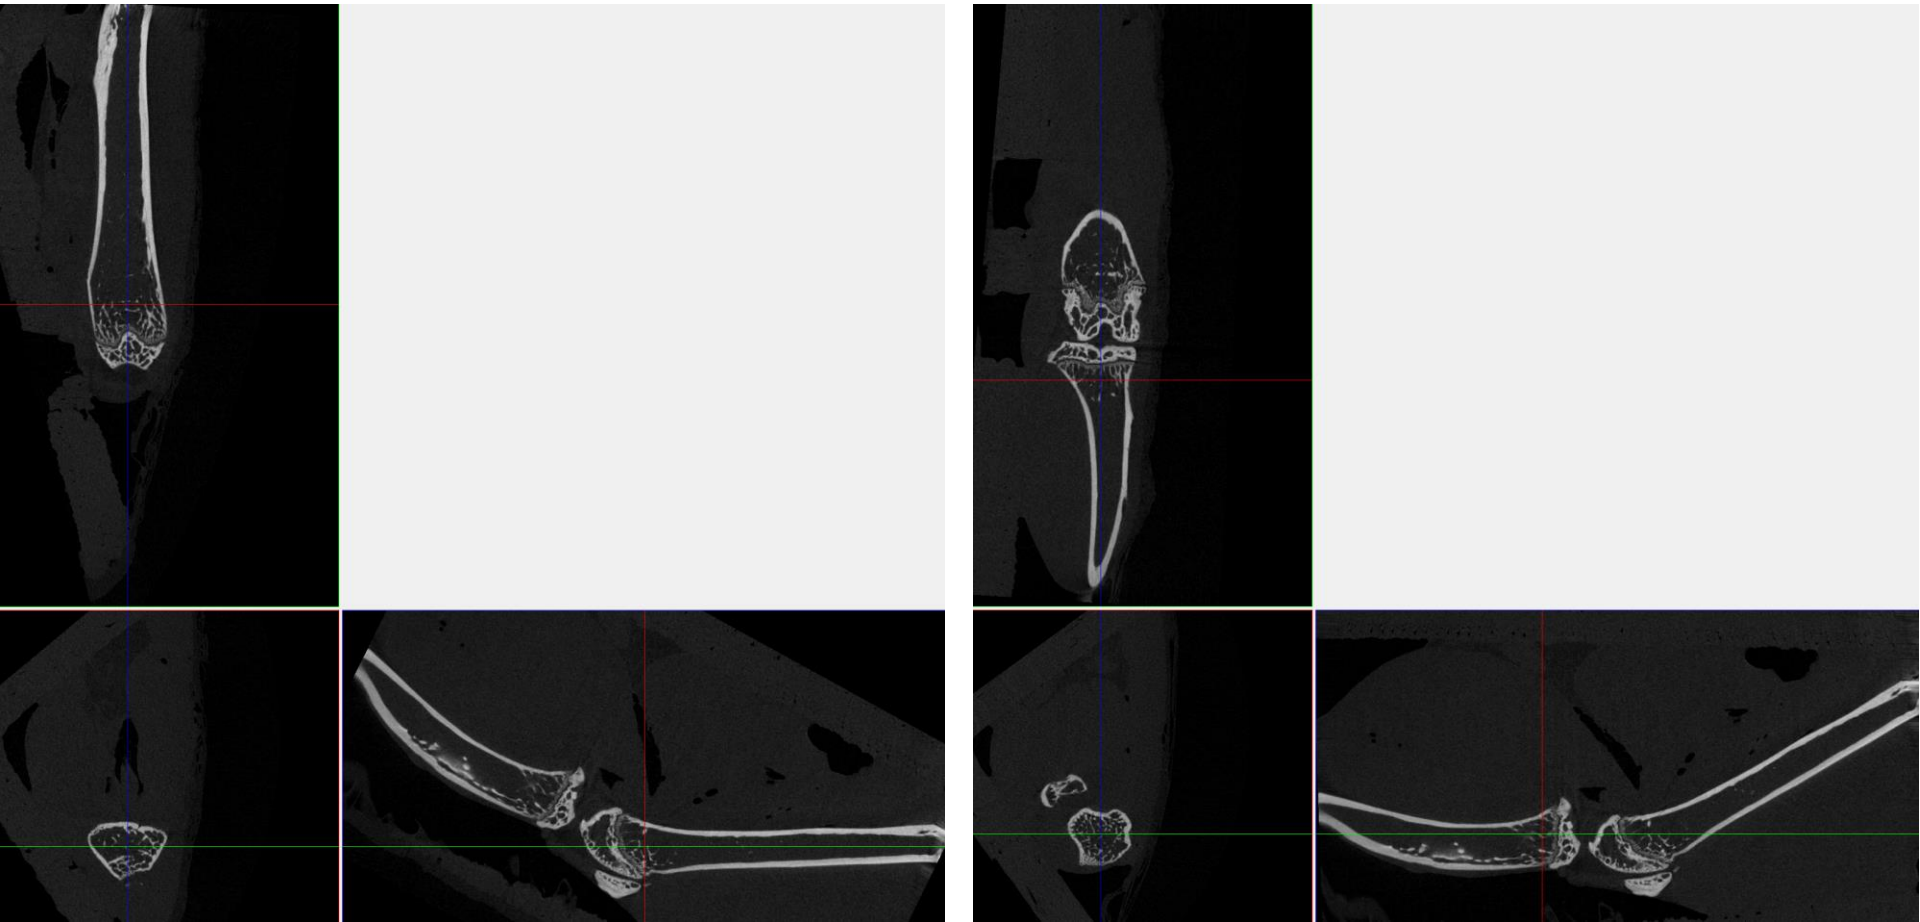

# Evaluation of bone mineral density and new bone formation in ovariectomized mice

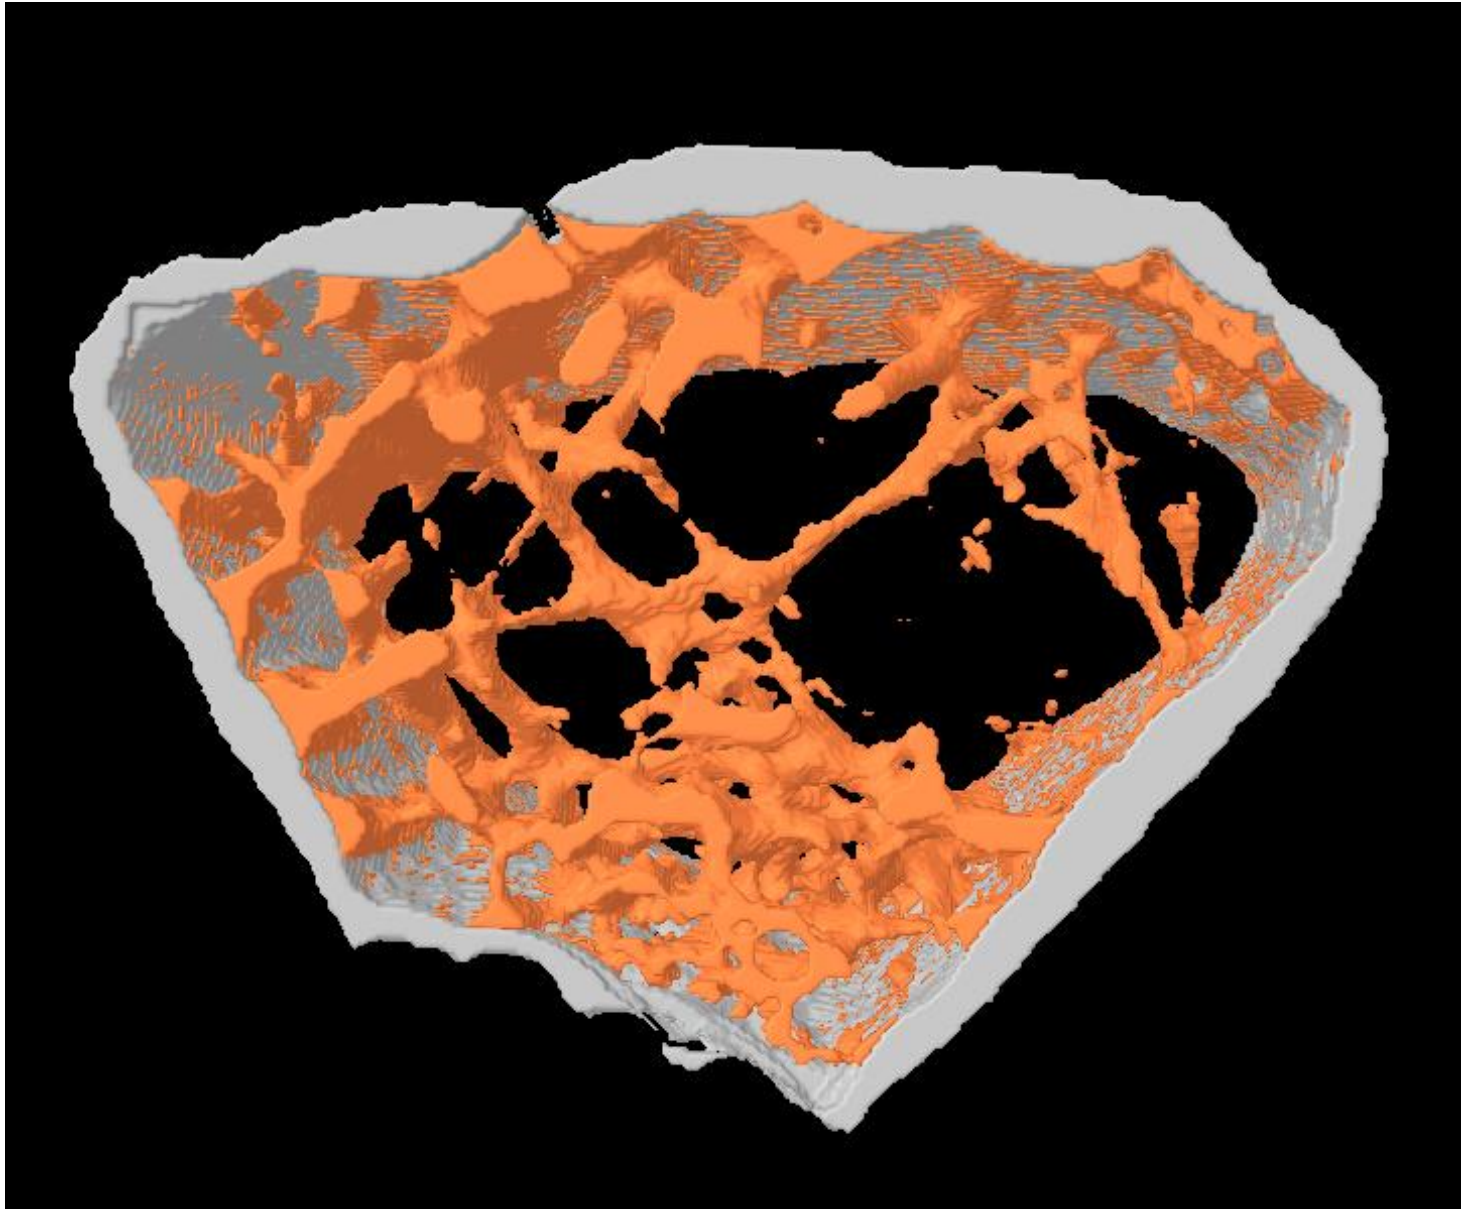

# Evaluation of bone mineral density and new bone formation in ovariectomized mice

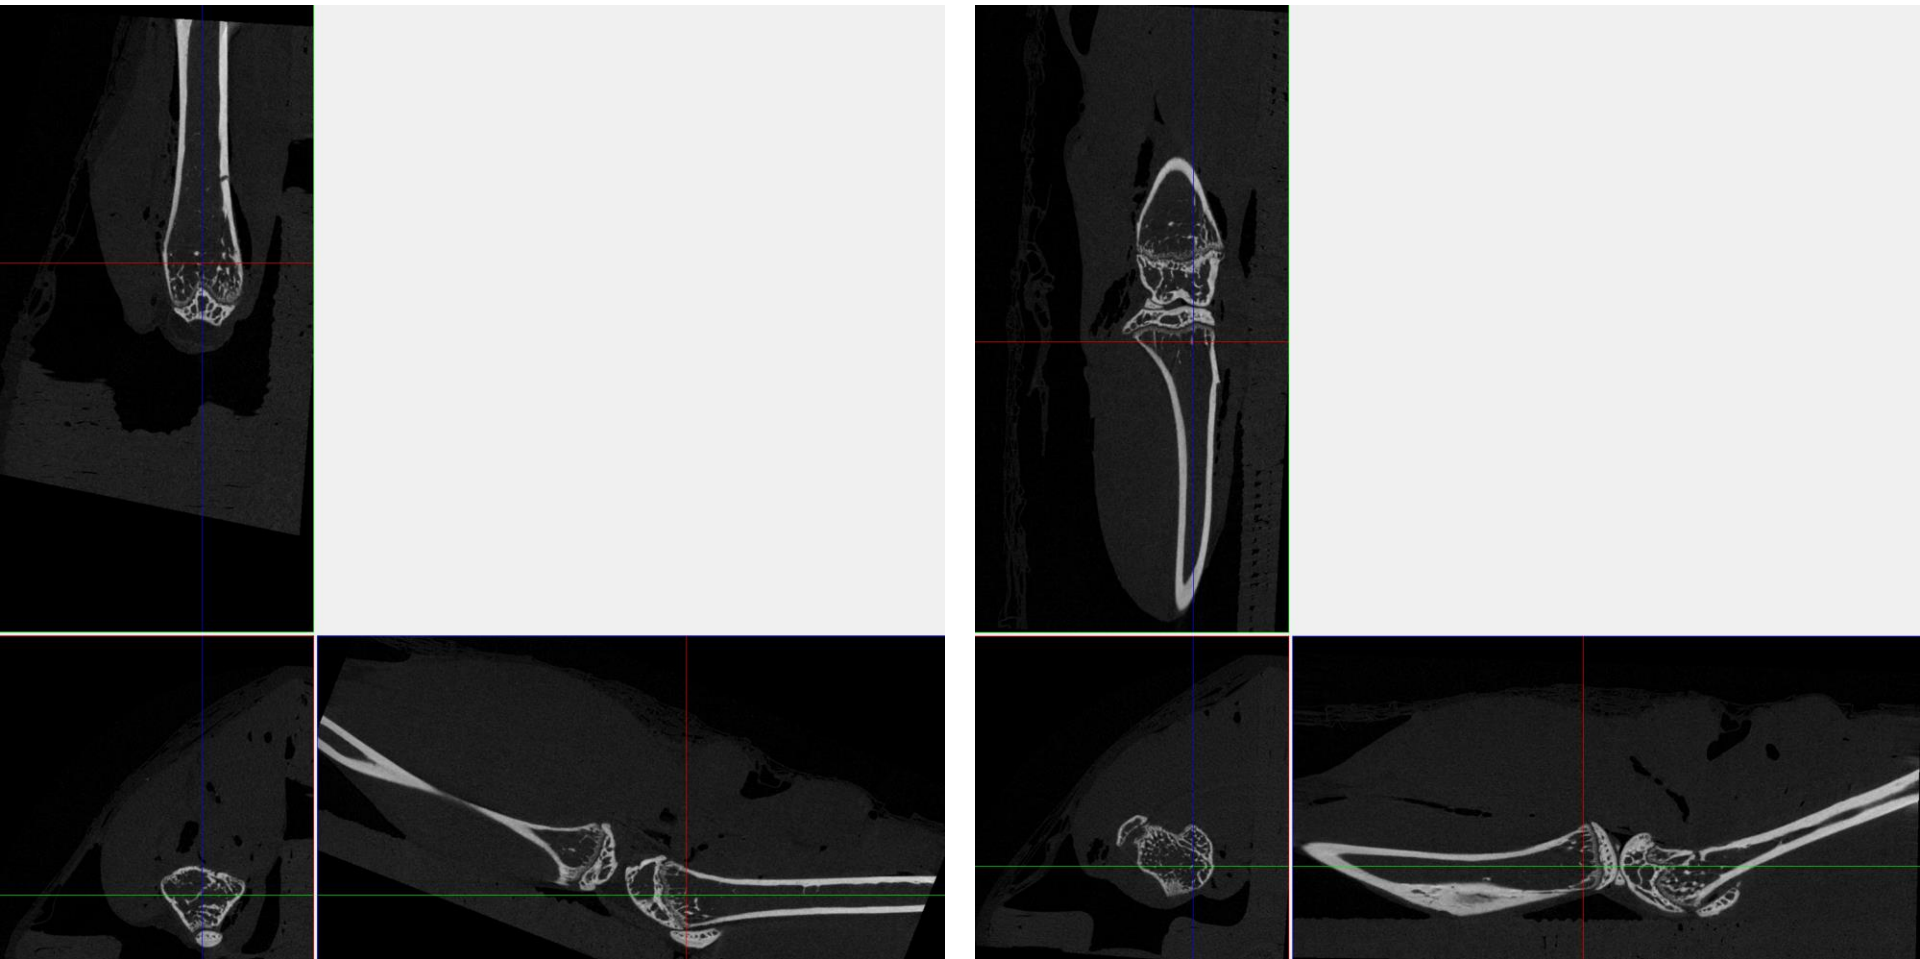



## Evaluation of bone mineral density and new bone formation in ovariectomized mice

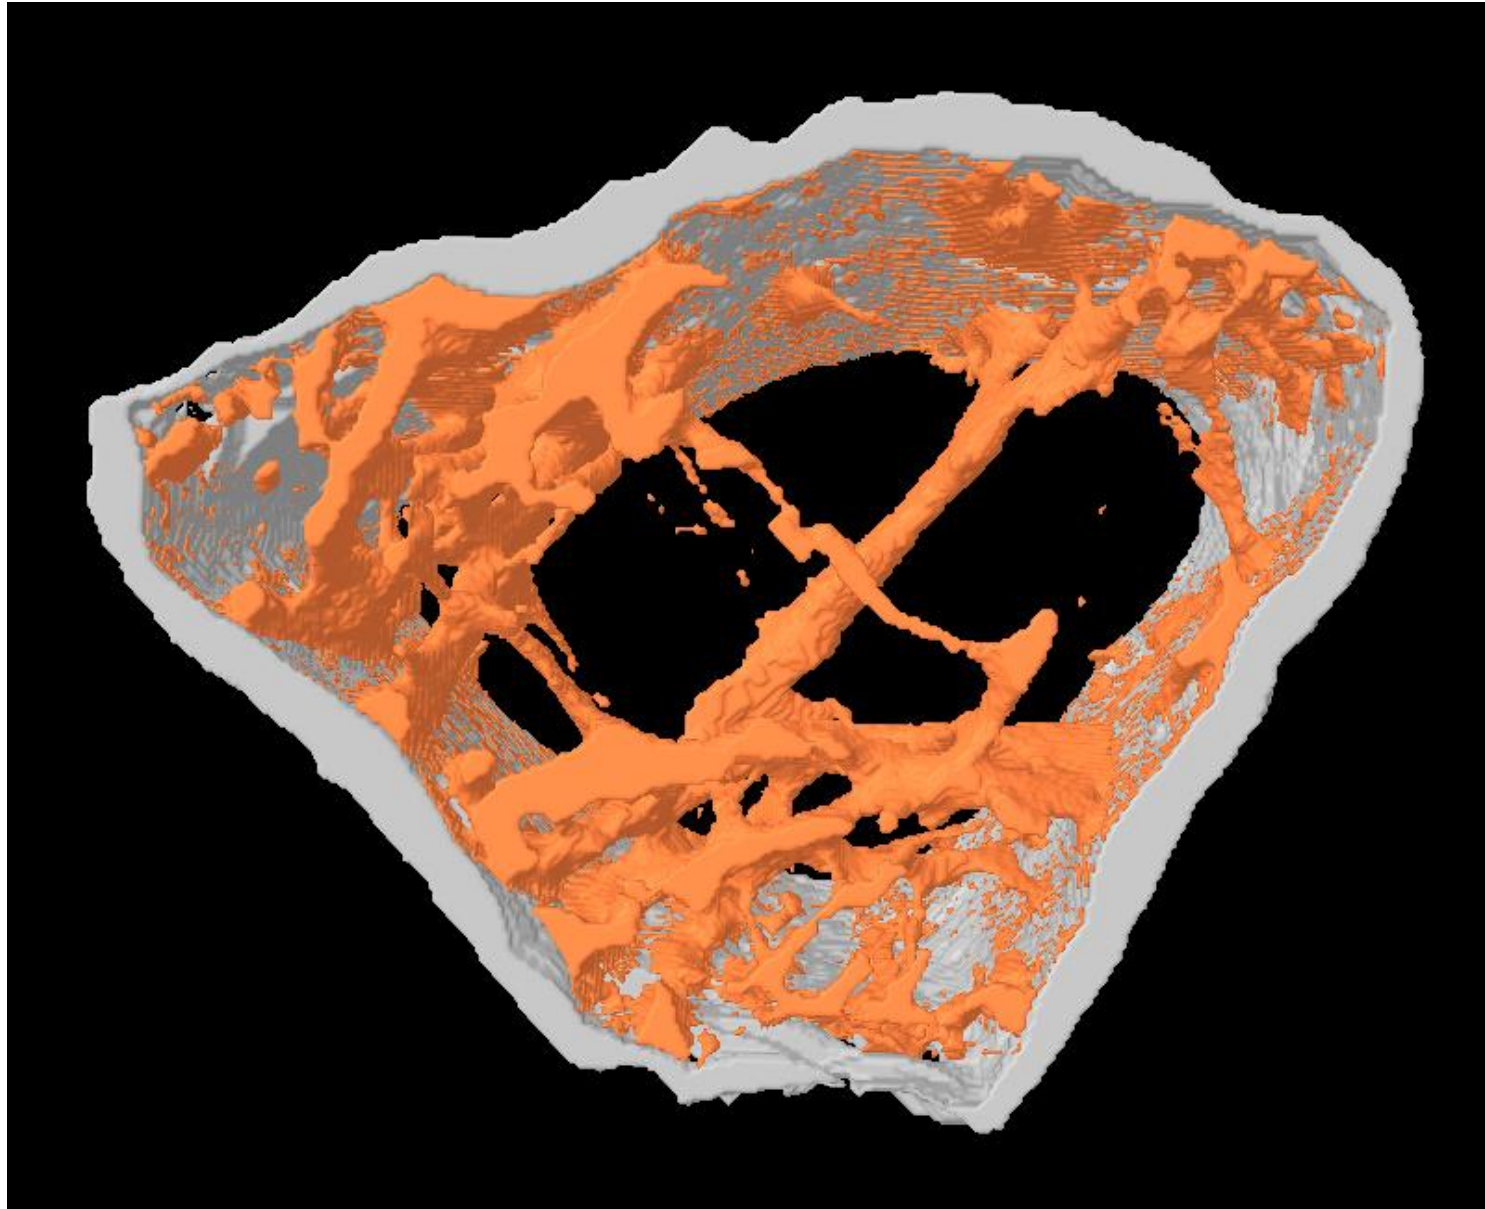

# Evaluation of bone mineral density and new bone formation in ovariectomized mice

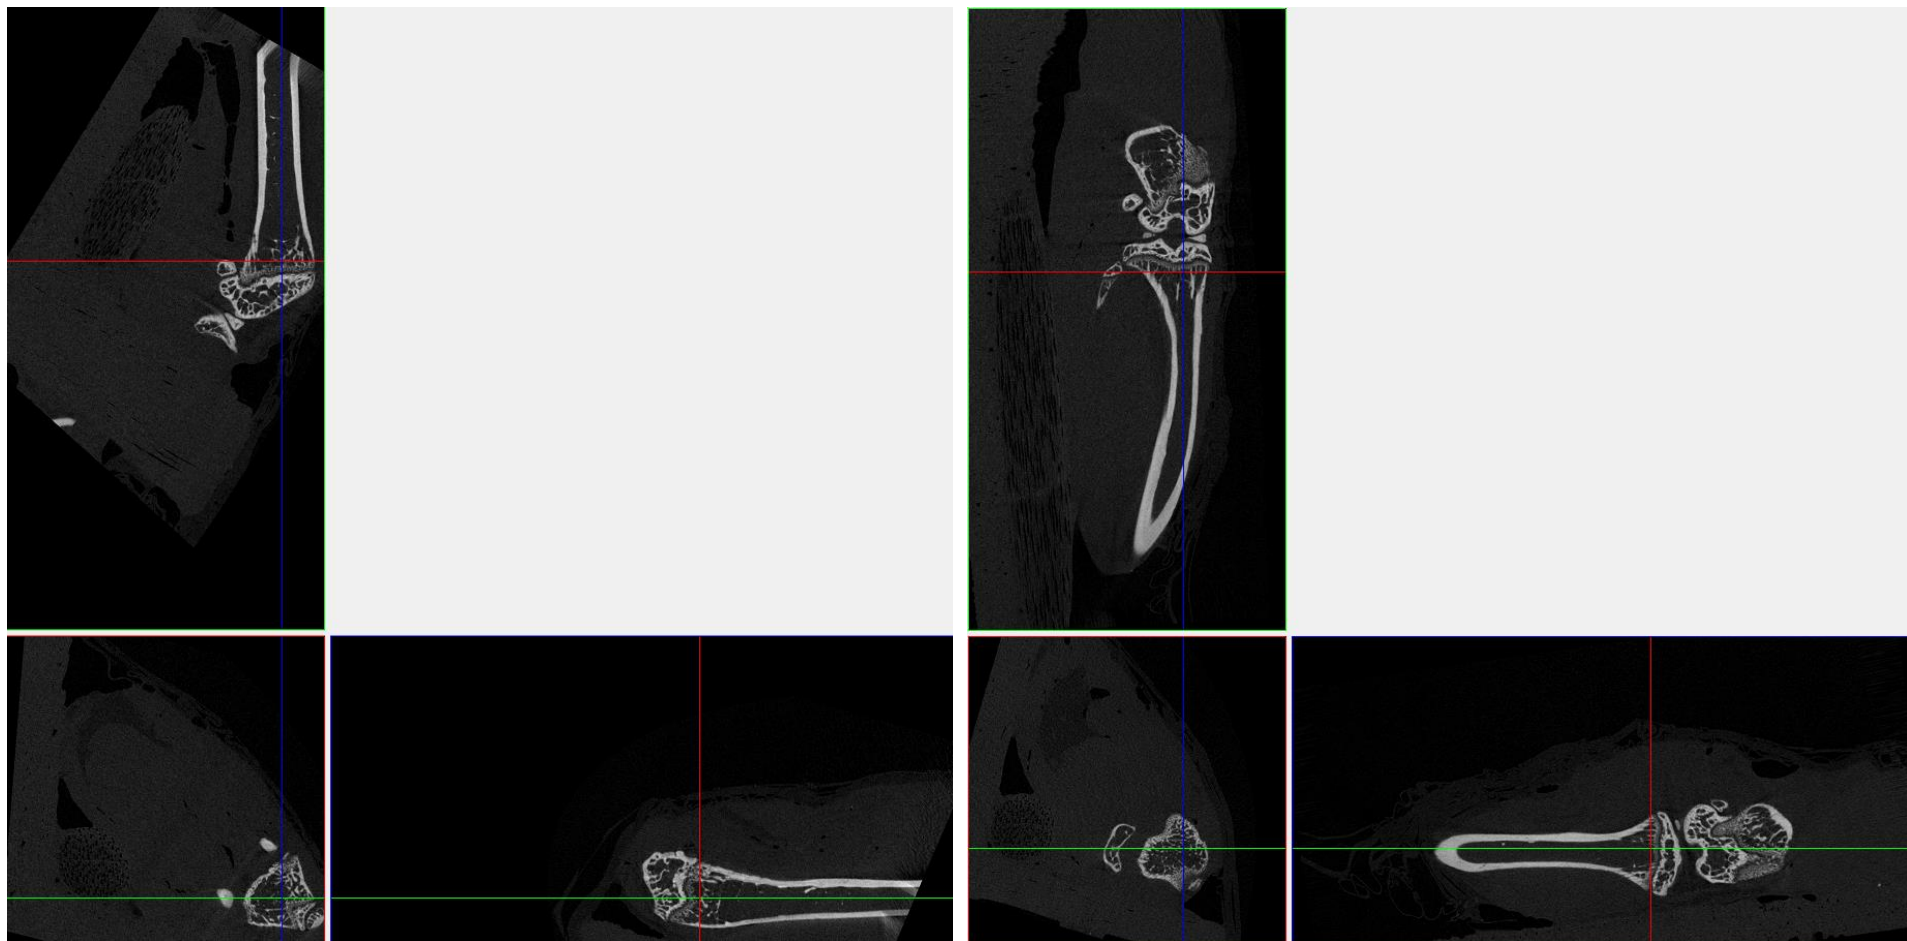

## Evaluation of bone mineral density and new bone formation in ovariectomized mice

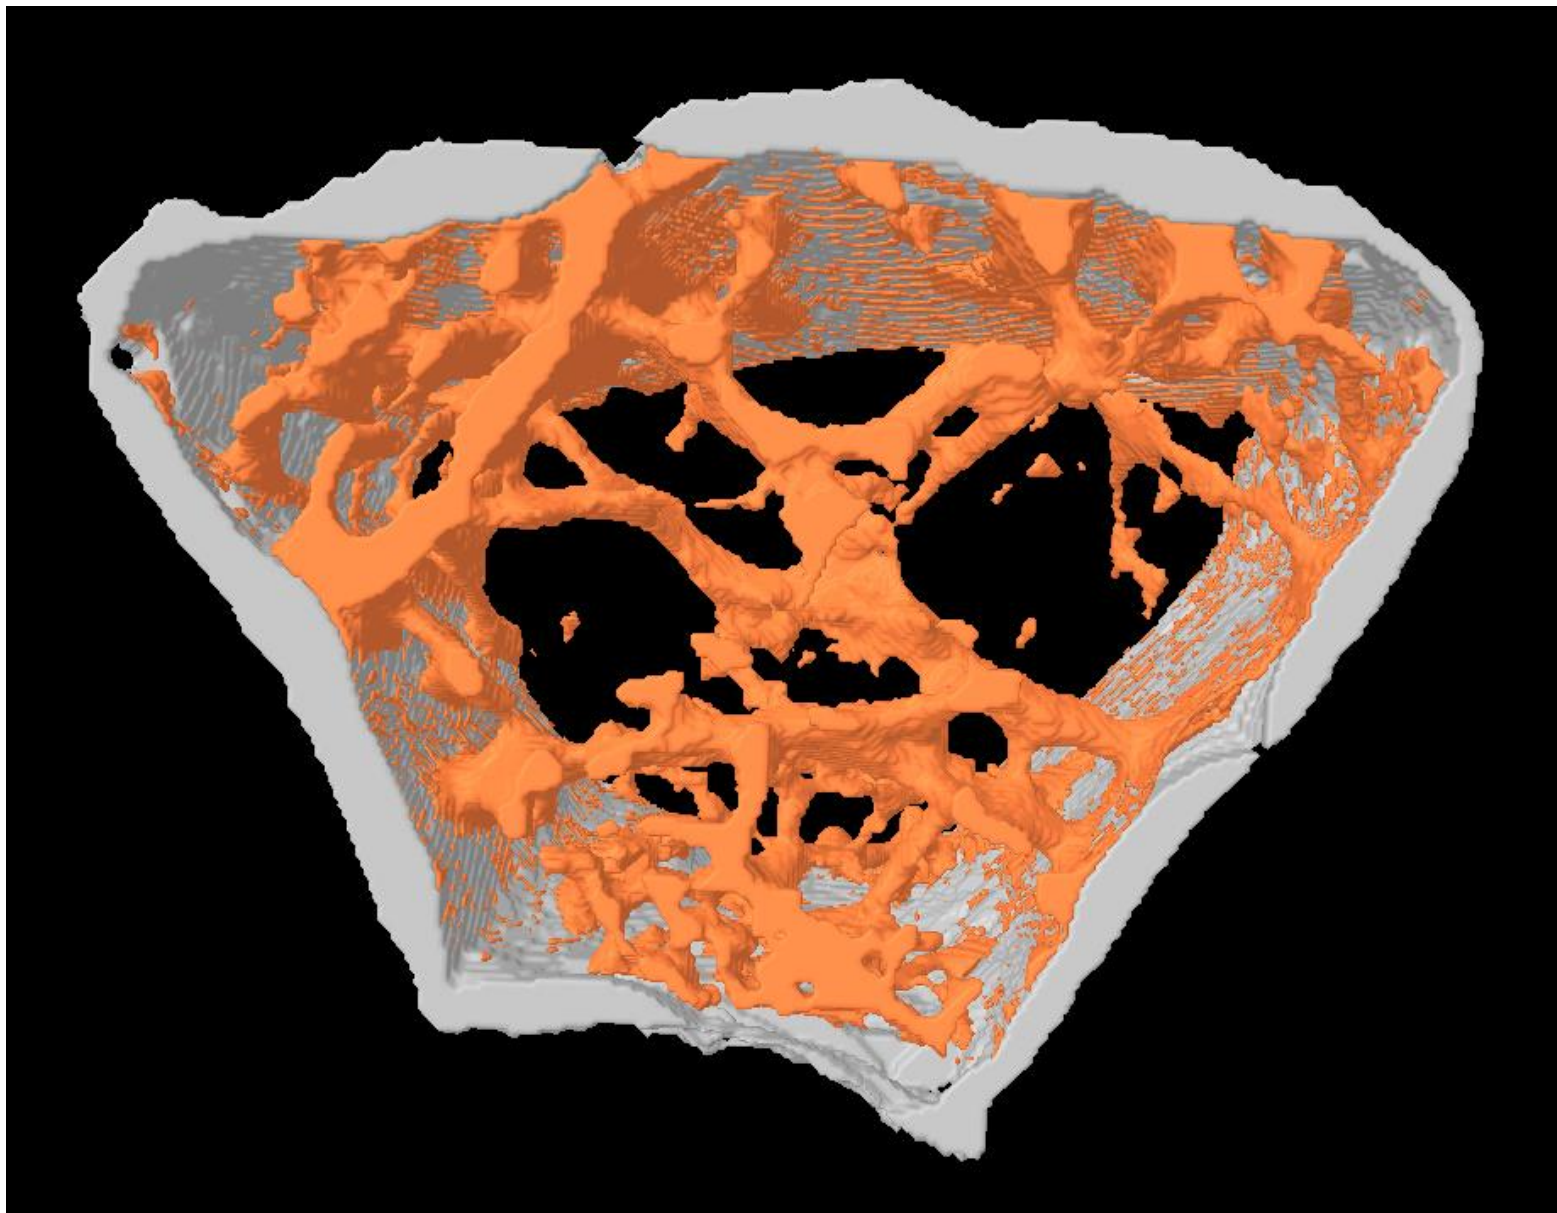

# Evaluation of bone mineral density and new bone formation in ovariectomized mice

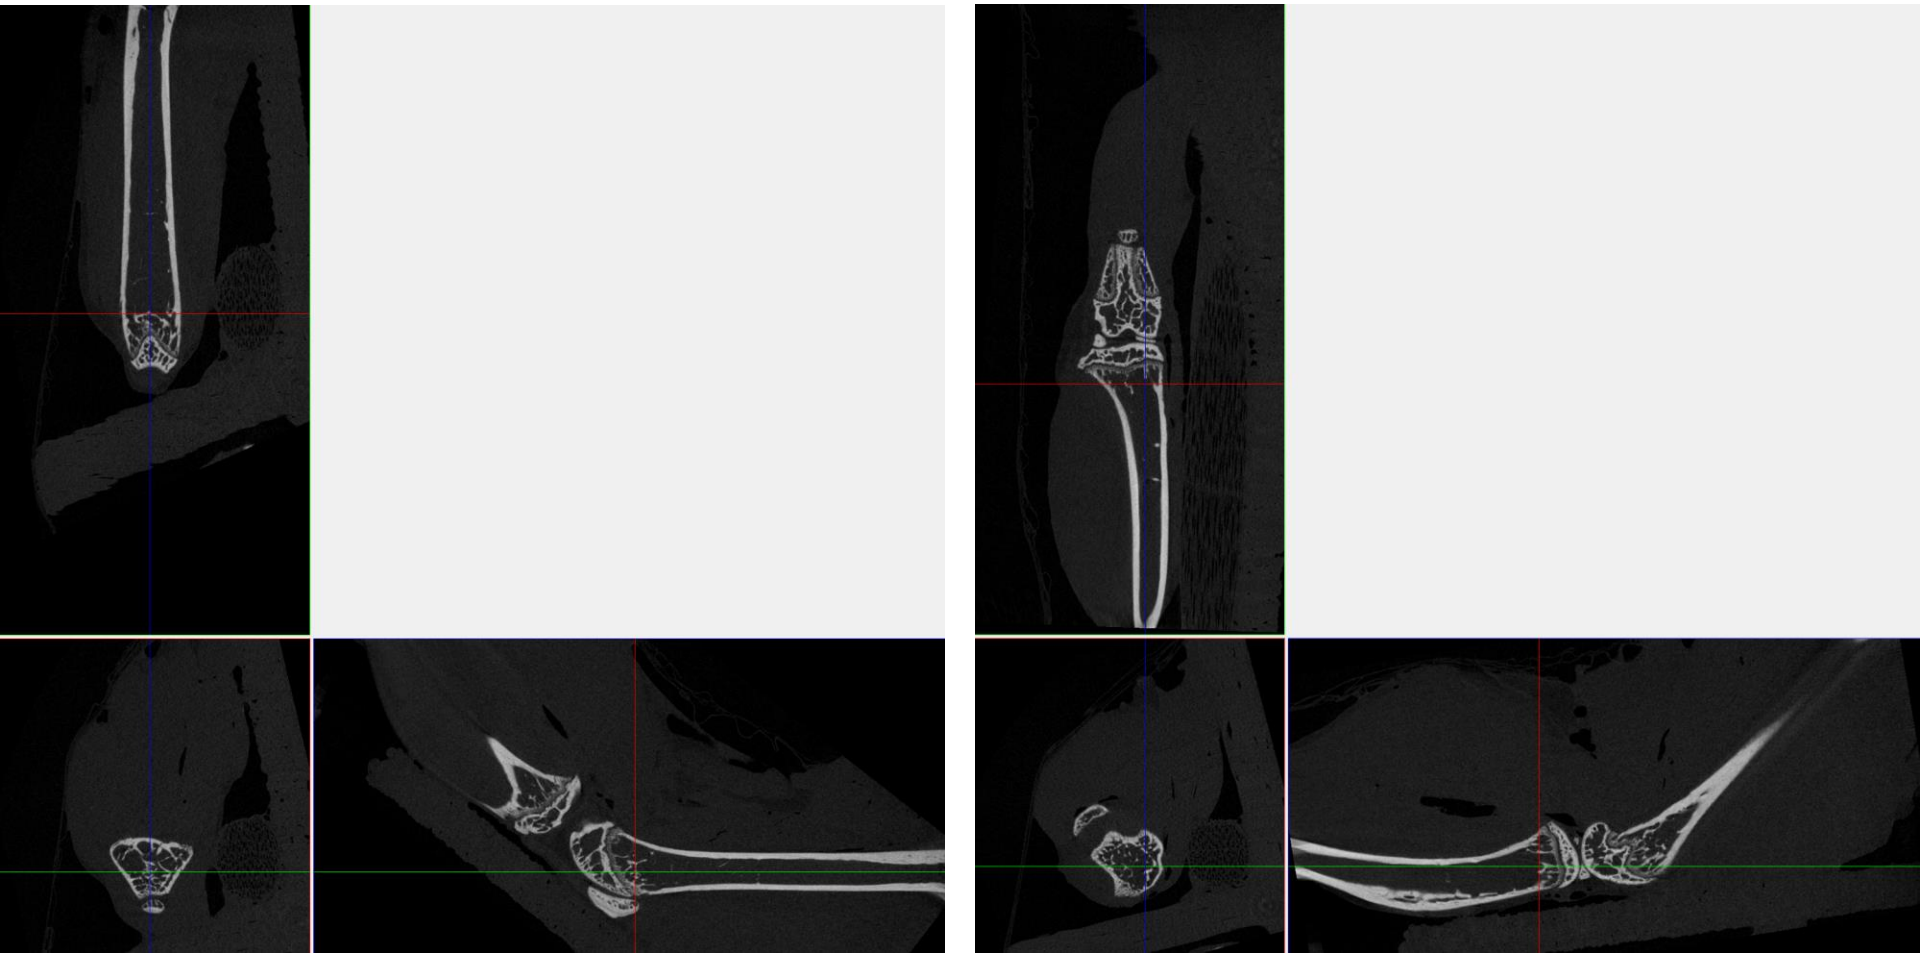



# Evaluation of bone mineral density and new bone formation in ovariectomized mice

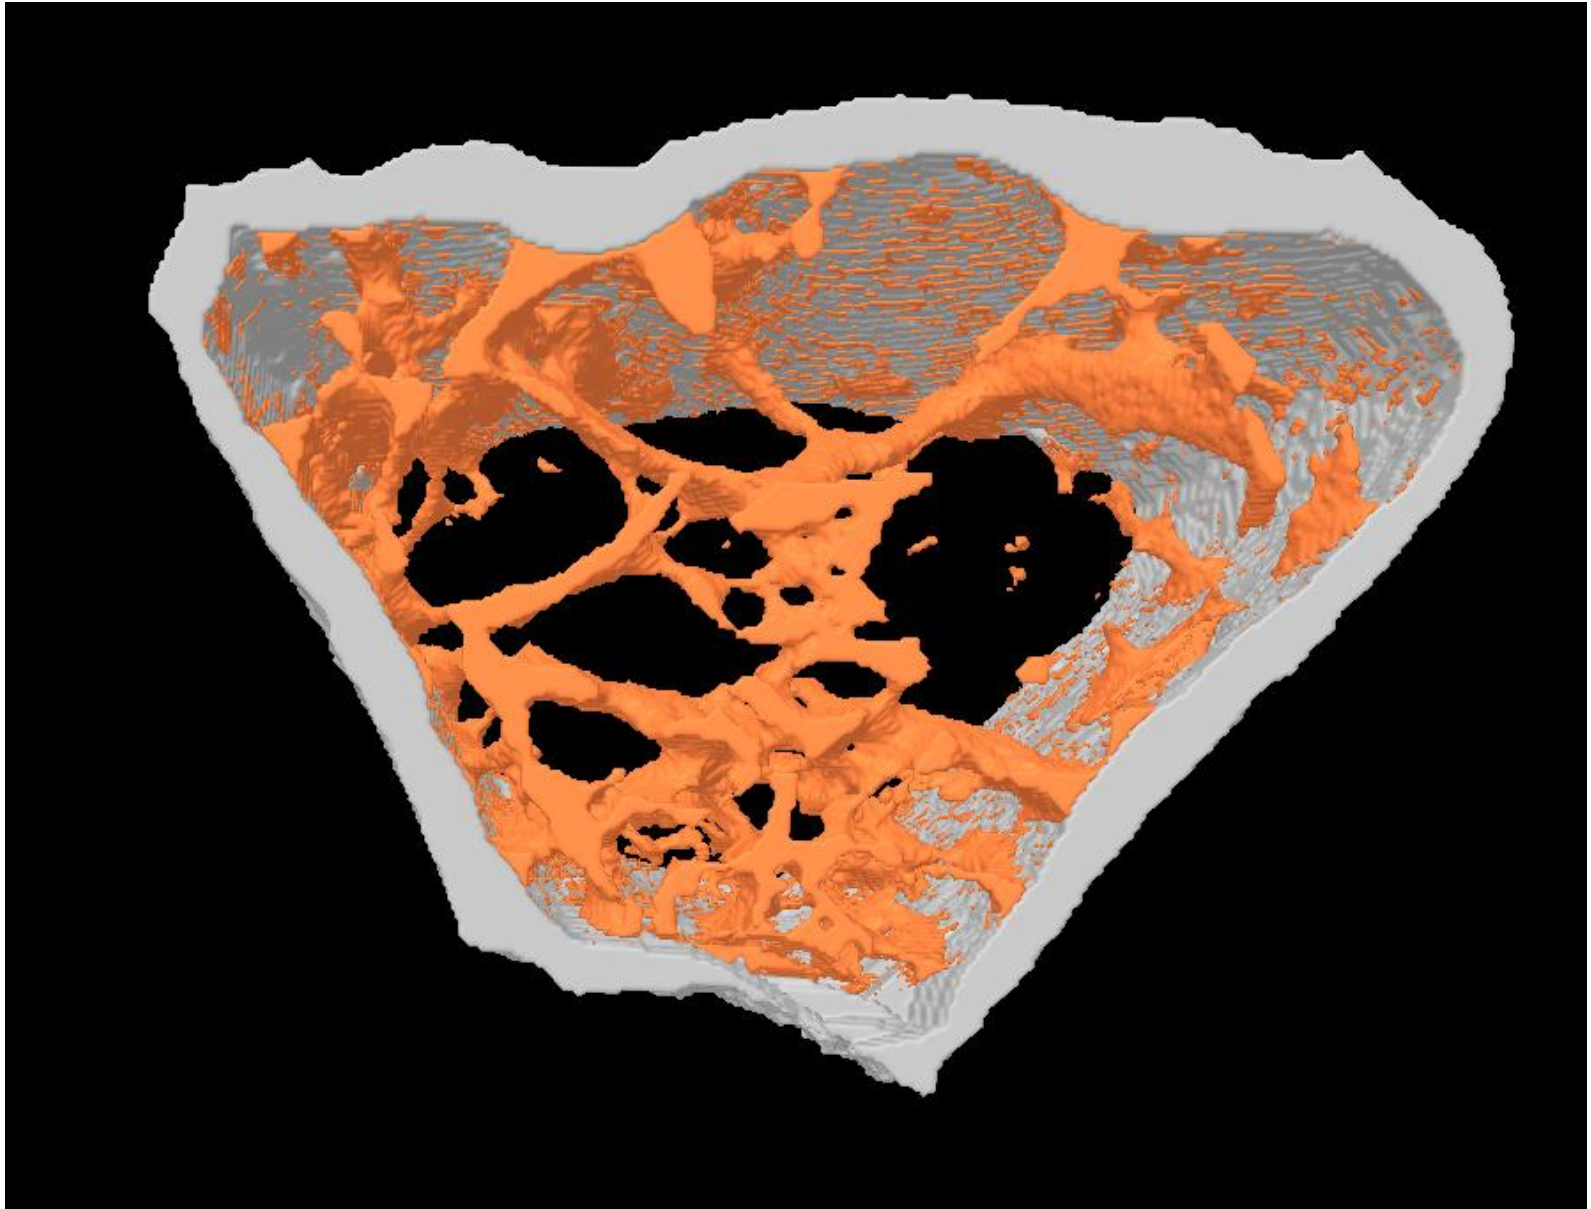

# Evaluation of bone mineral density and new bone formation in ovariectomized mice

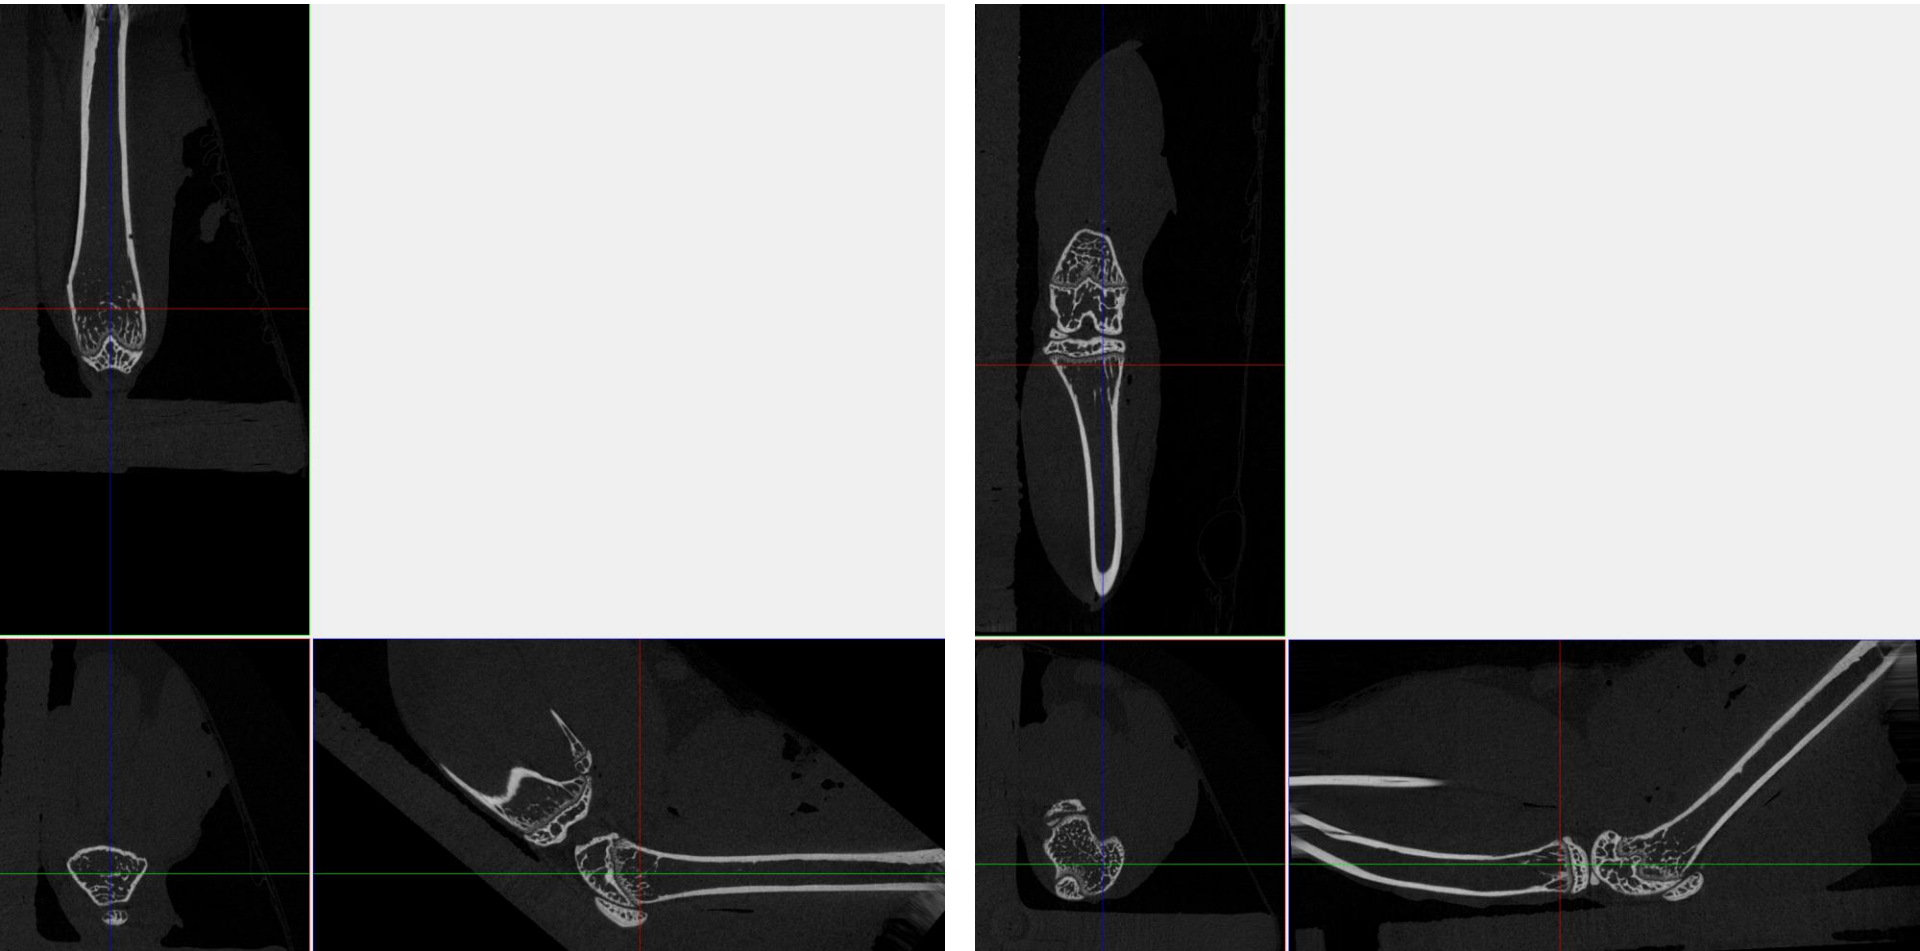

# Evaluation of bone mineral density and new bone formation in ovariectomized mice

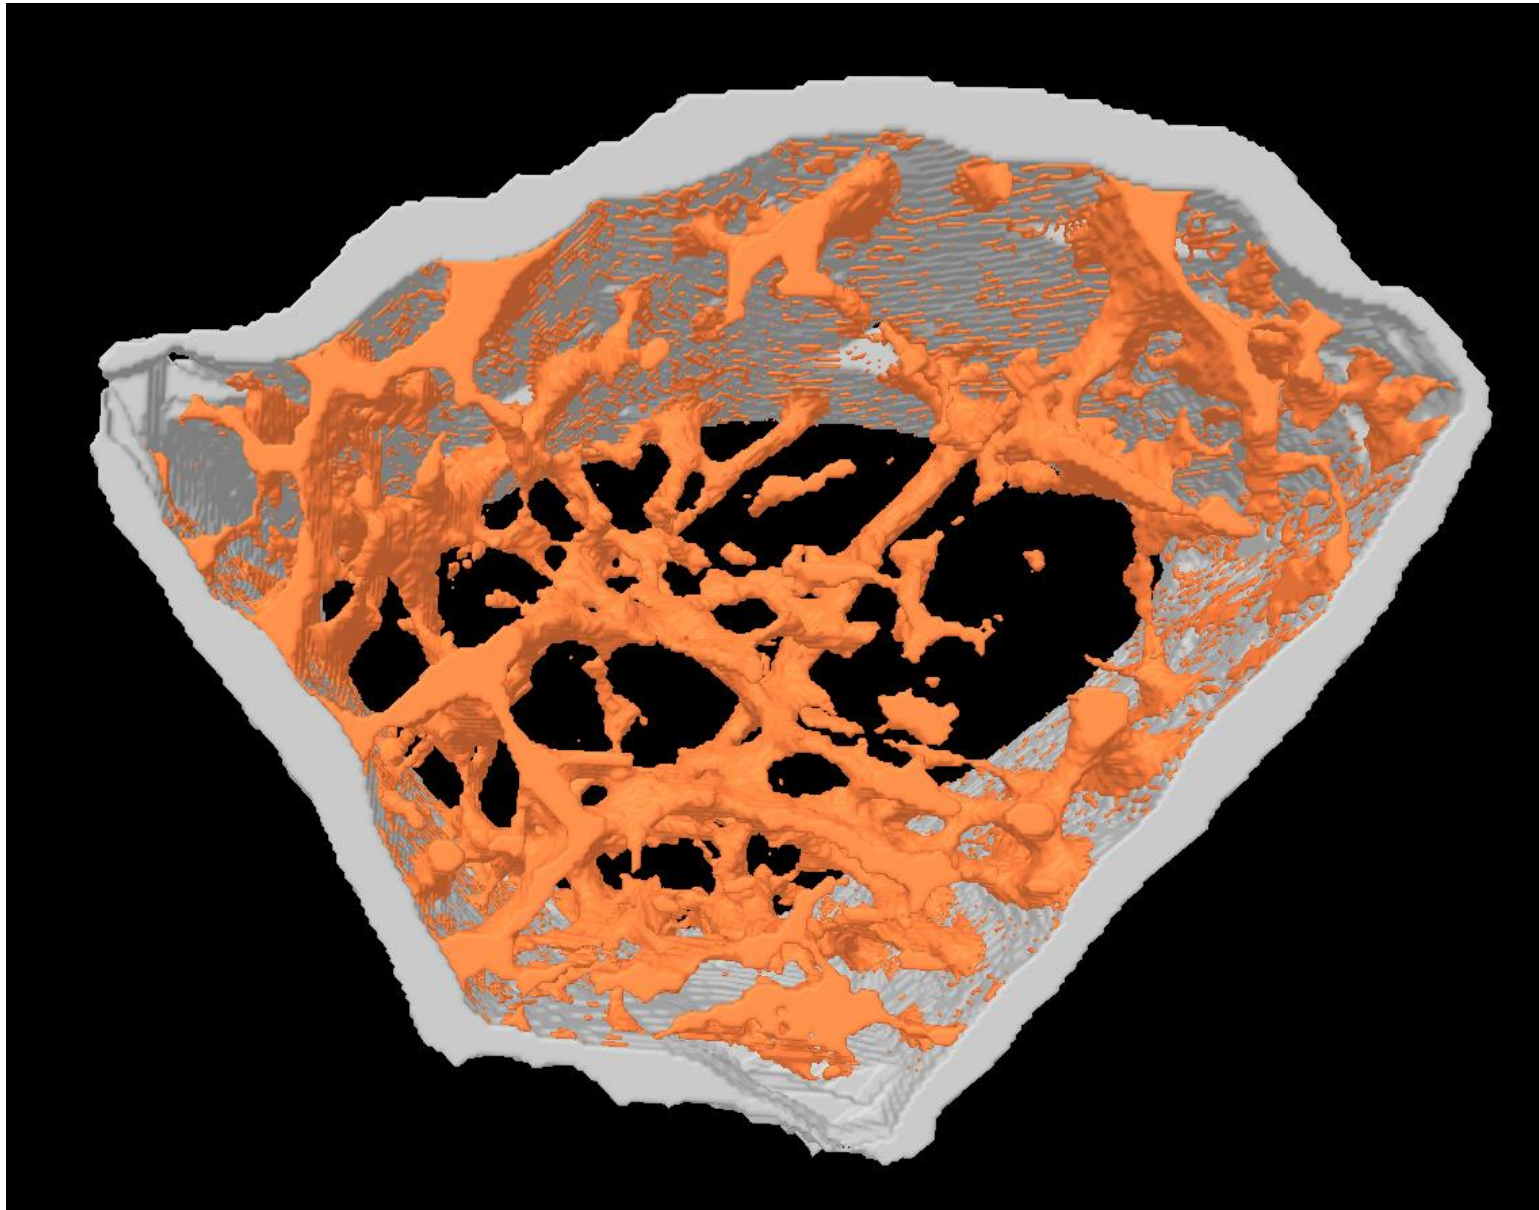

# Evaluation of bone mineral density and new bone formation in ovariectomized mice

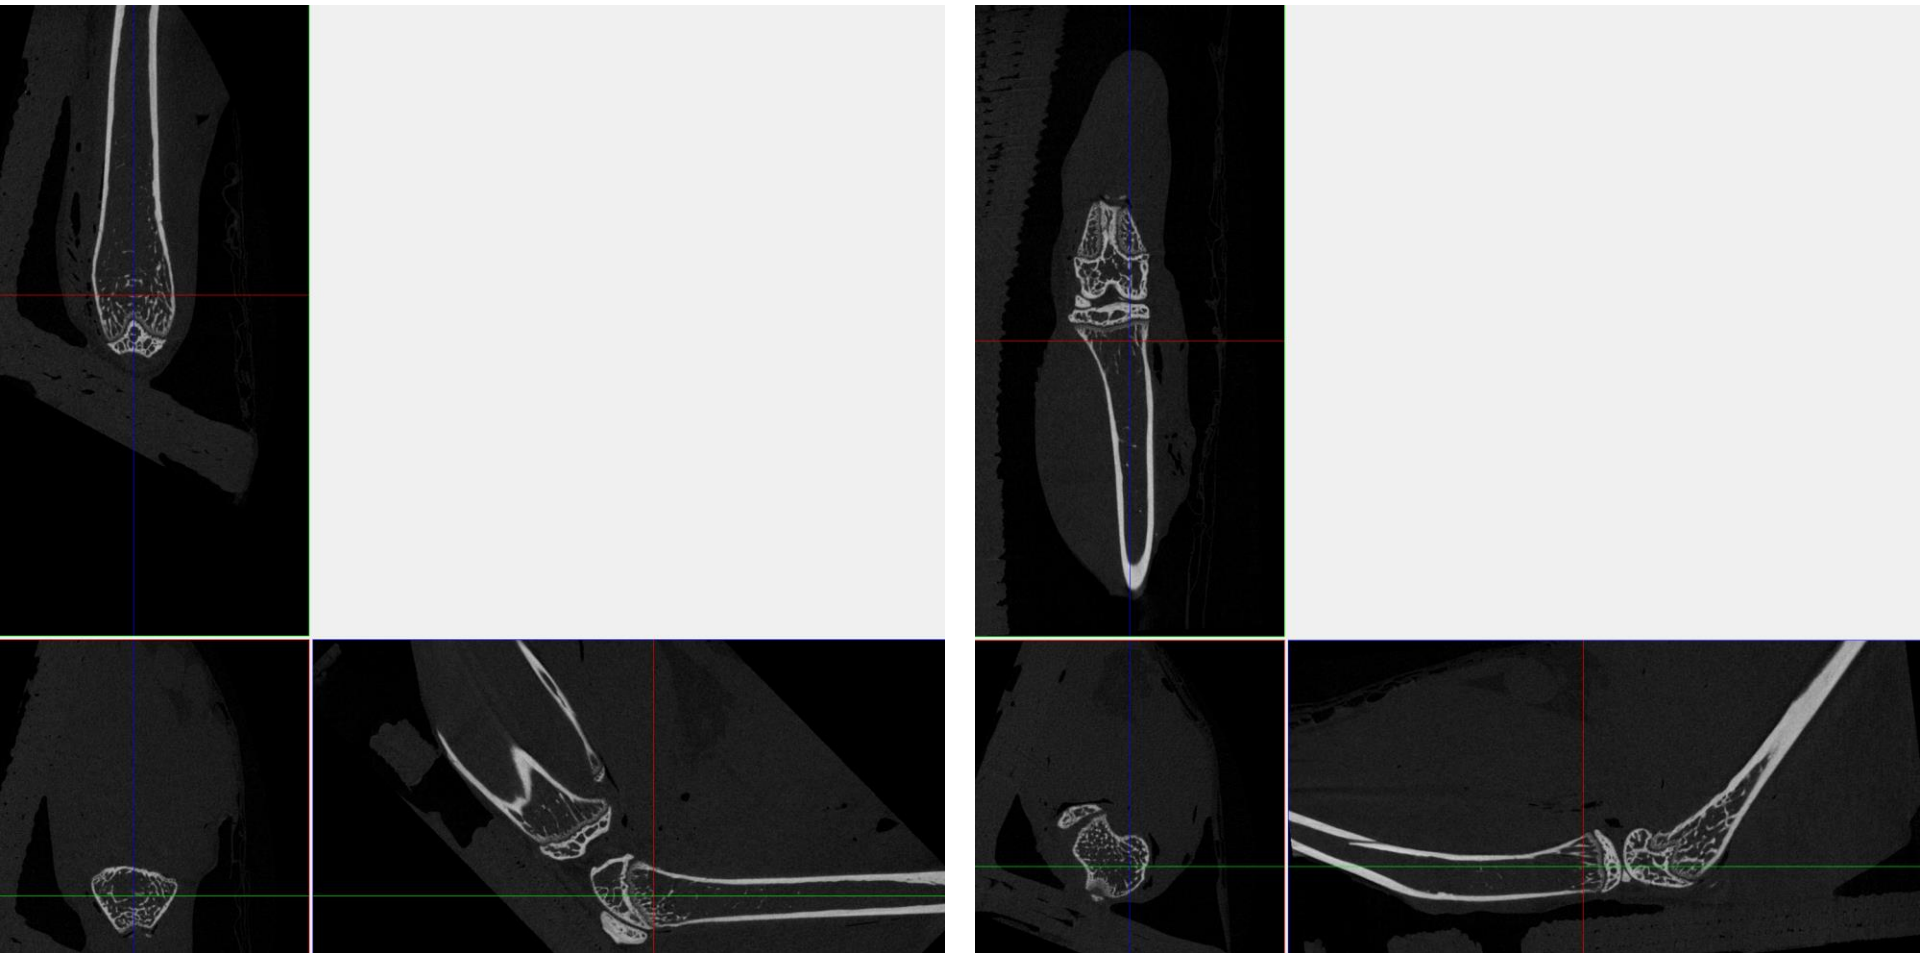



## Evaluation of bone mineral density and new bone formation in ovariectomized mice

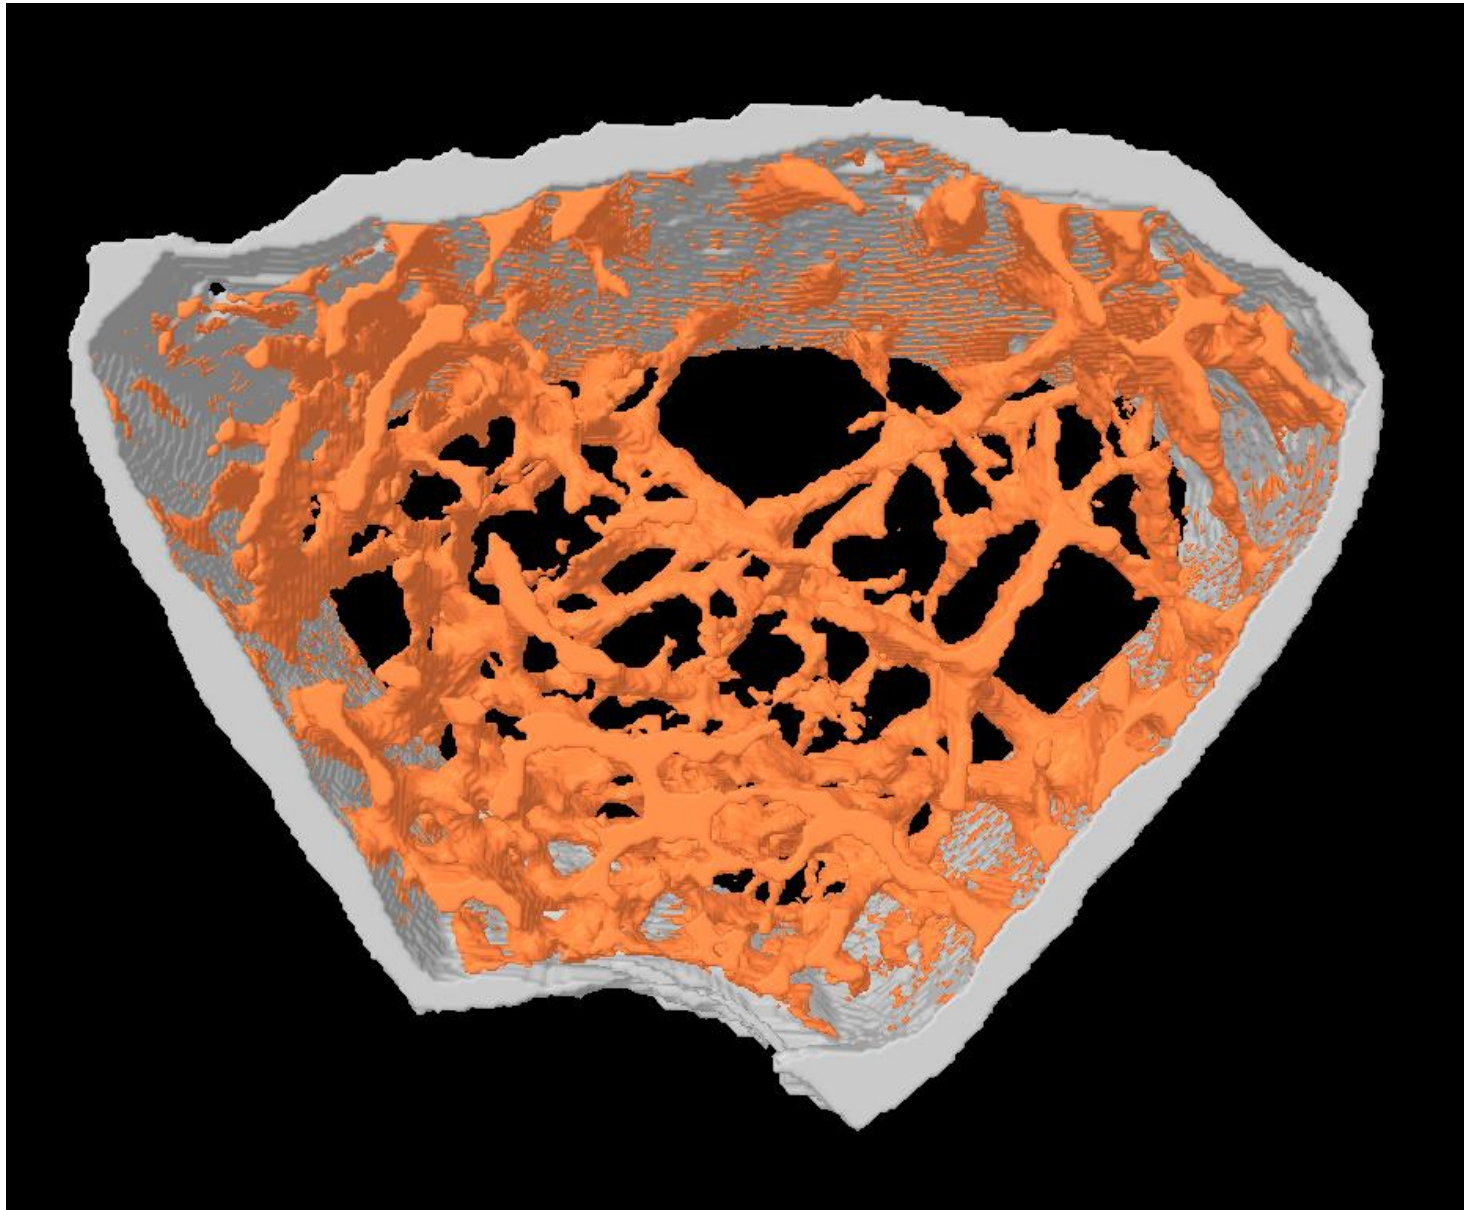

# Evaluation of bone mineral density and new bone formation in ovariectomized mice

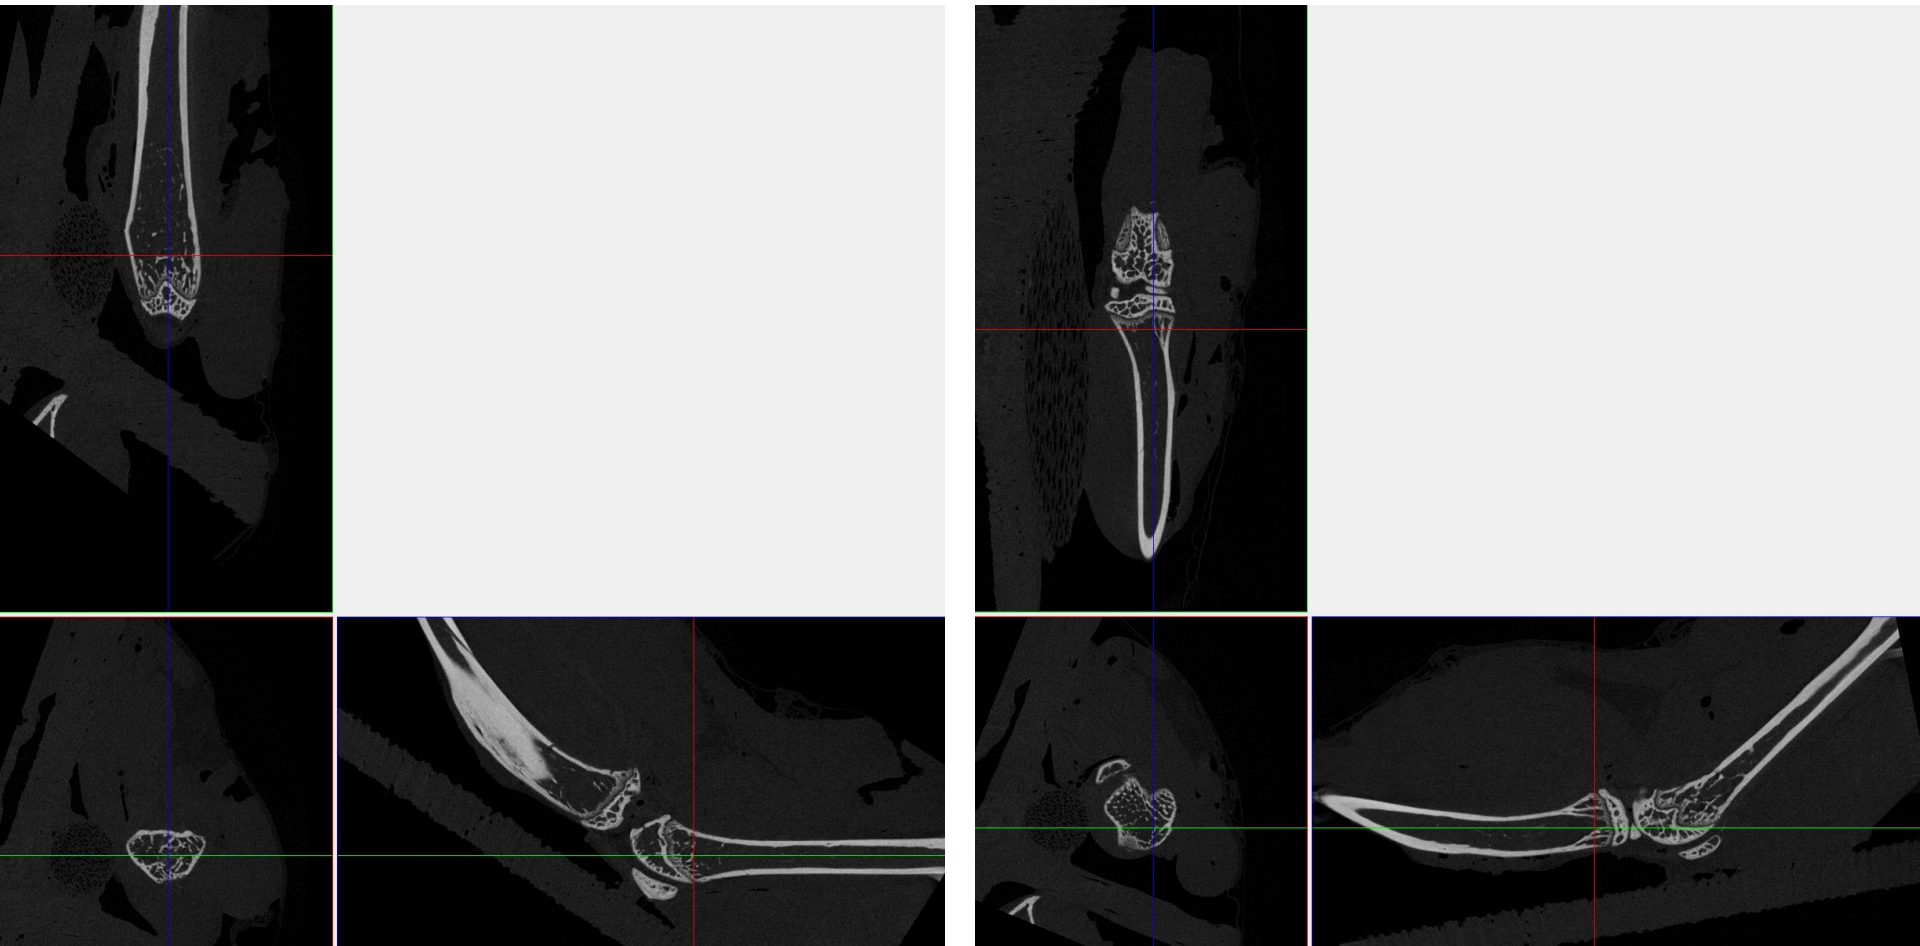

## Evaluation of bone mineral density and new bone formation in ovariectomized mice

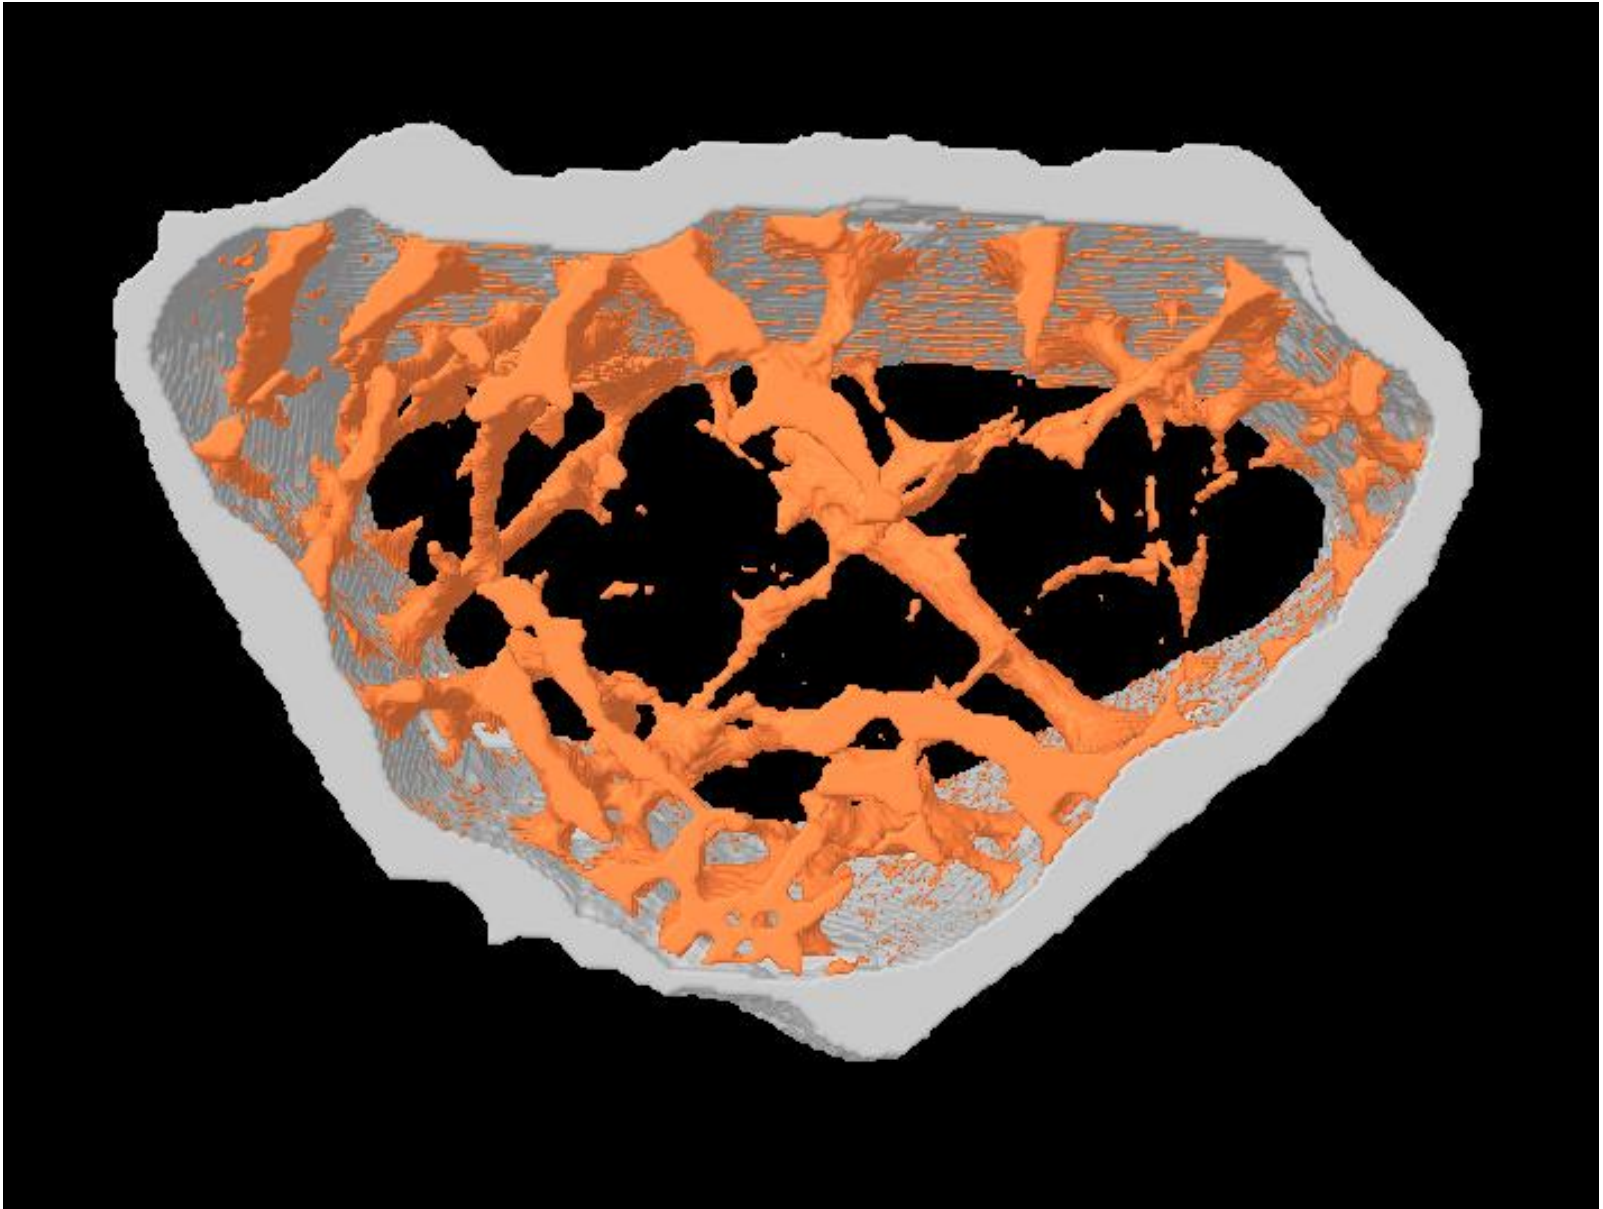



# Evaluation of bone mineral density and new bone formation in ovariectomized mice

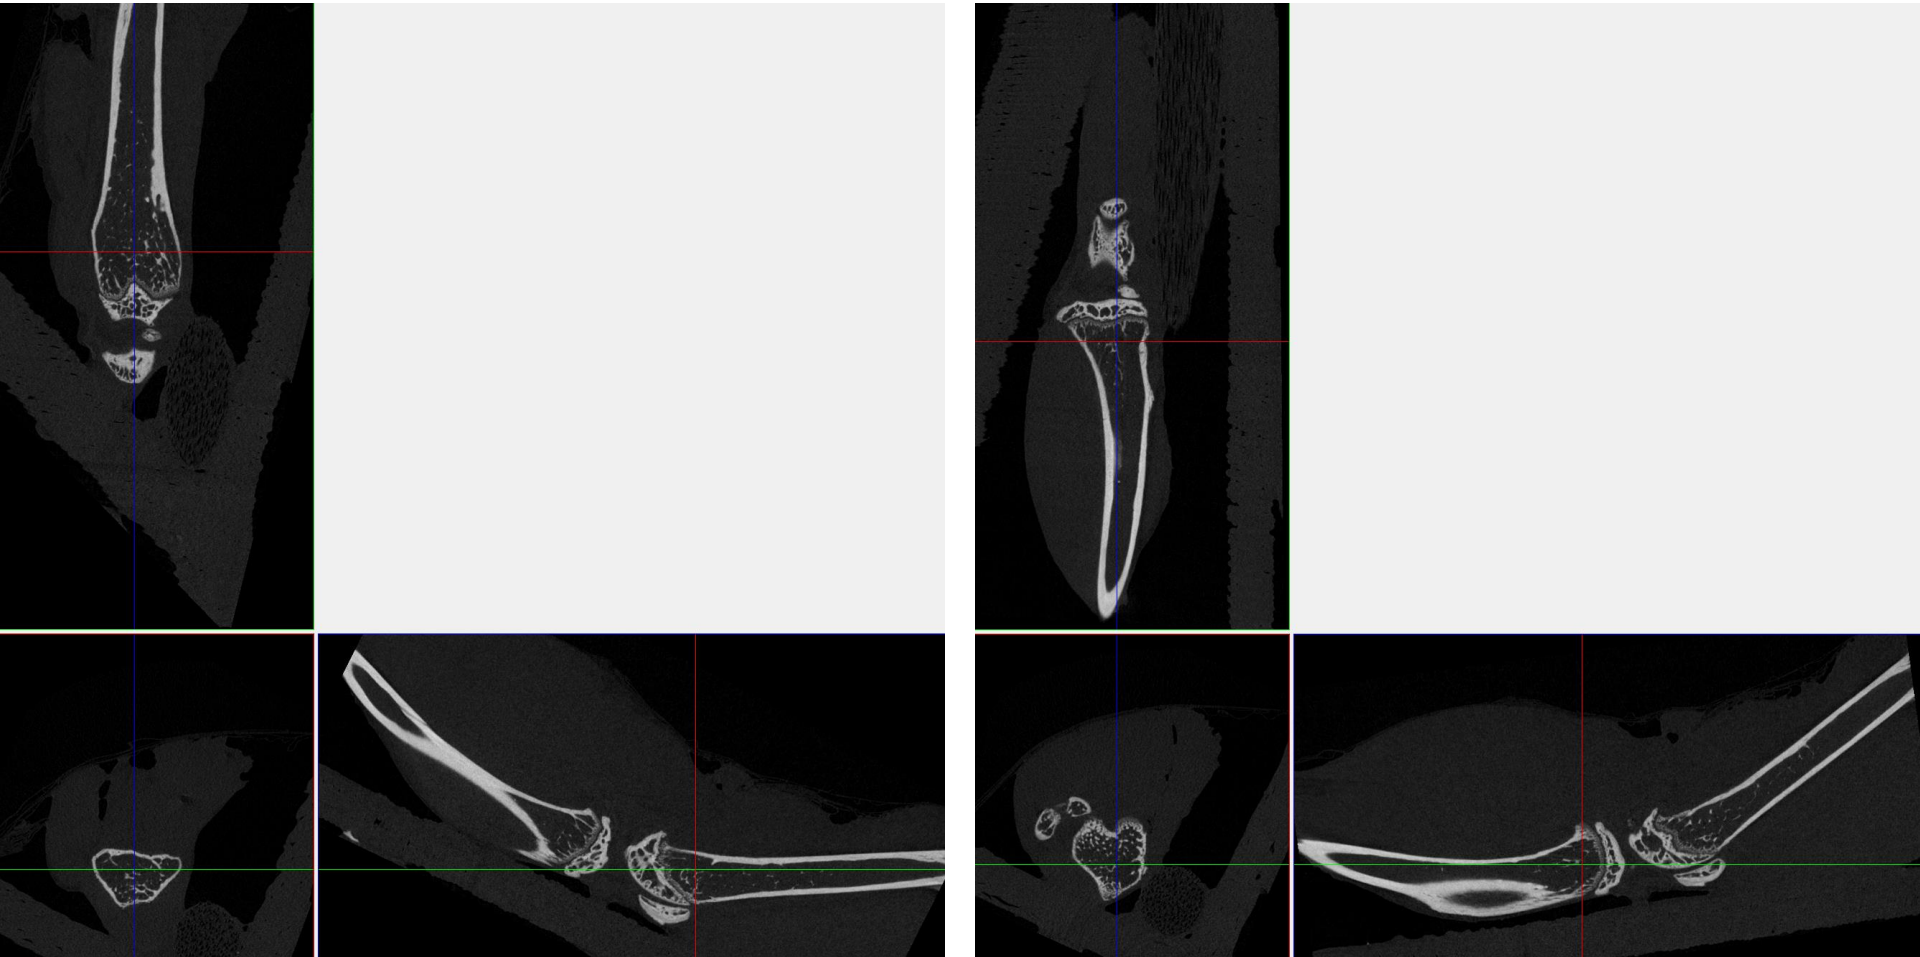



## Evaluation of bone mineral density and new bone formation in ovariectomized mice

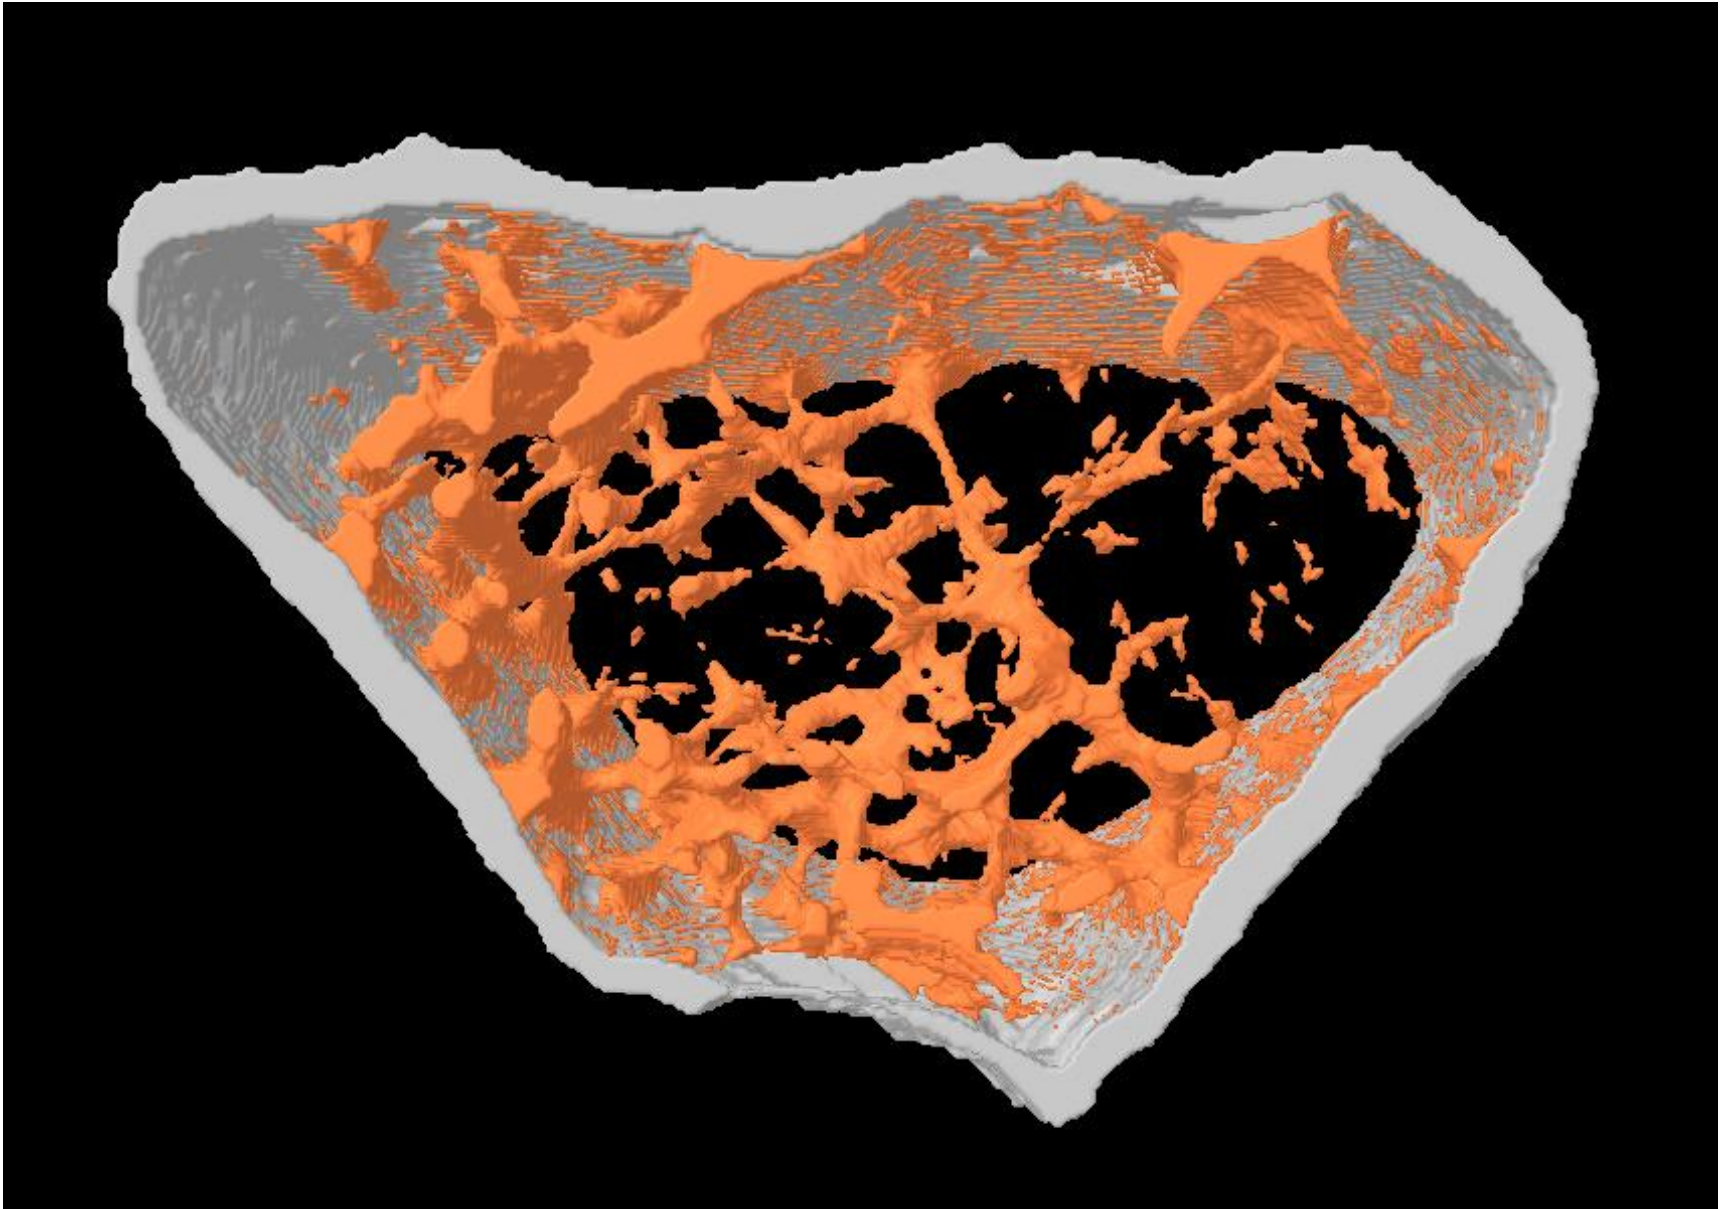

# Evaluation of bone mineral density and new bone formation in ovariectomized mice

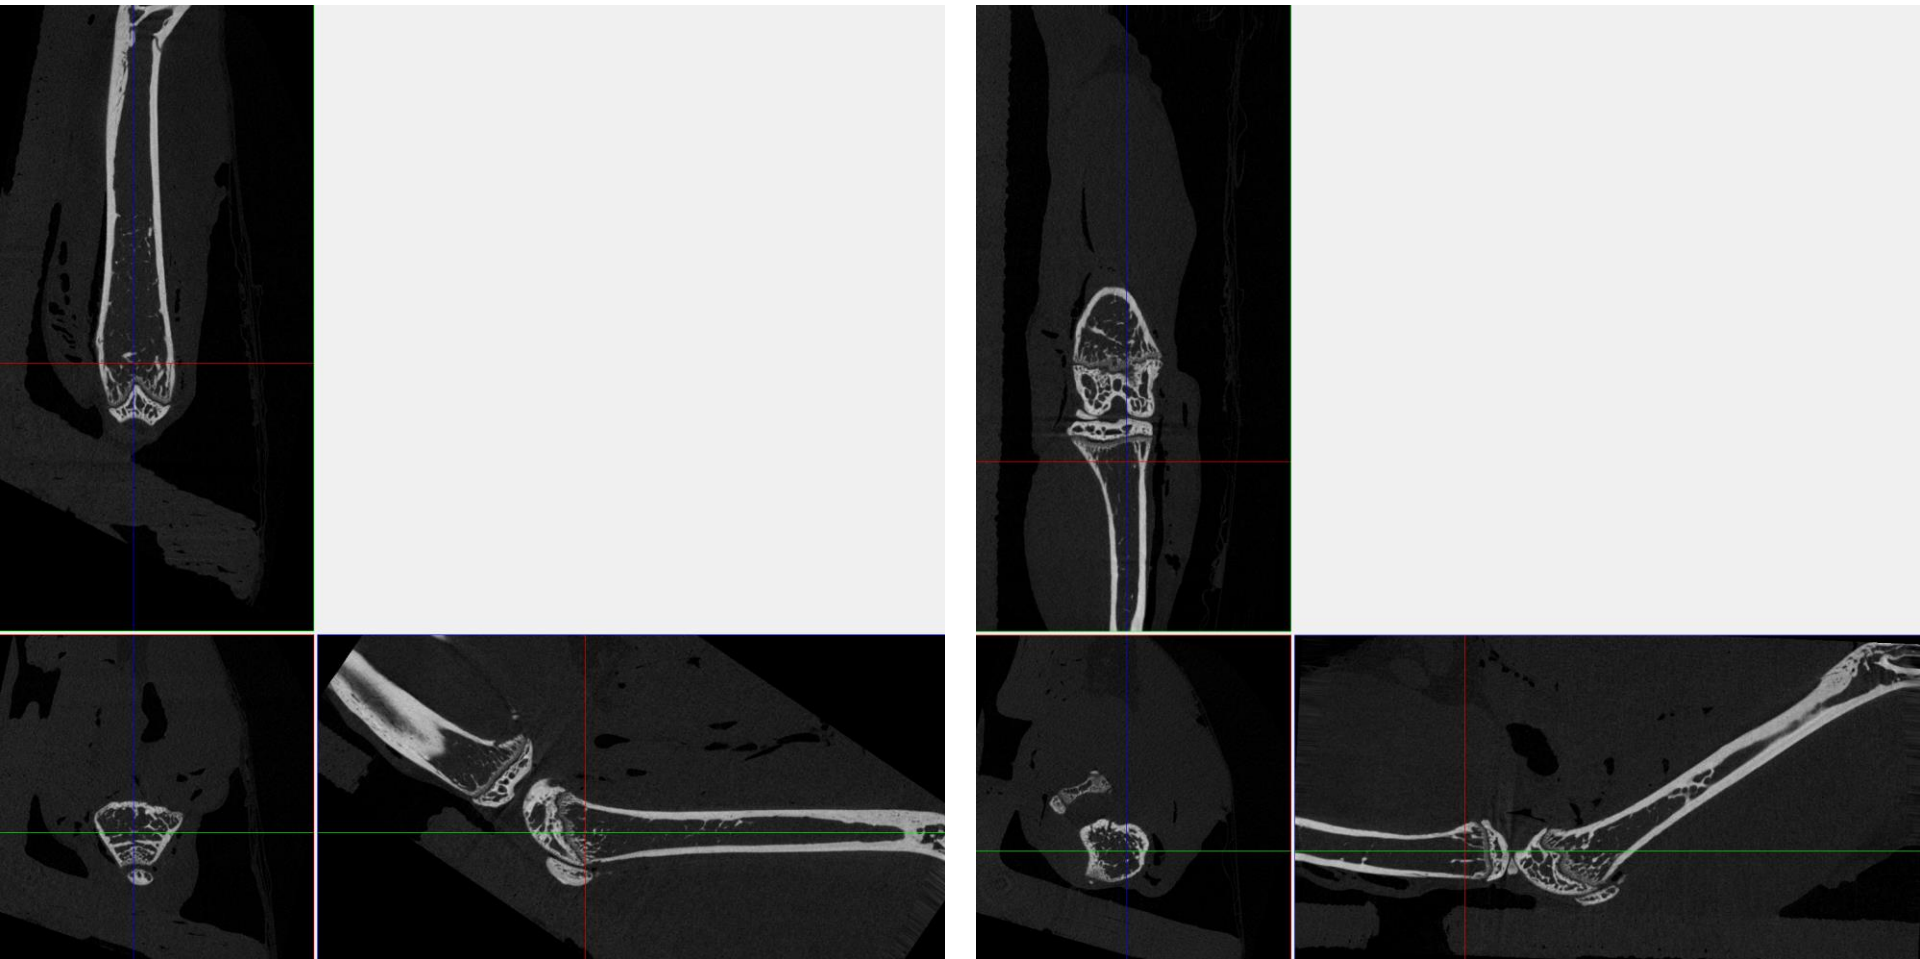

# Evaluation of bone mineral density and new bone formation in ovariectomized mice

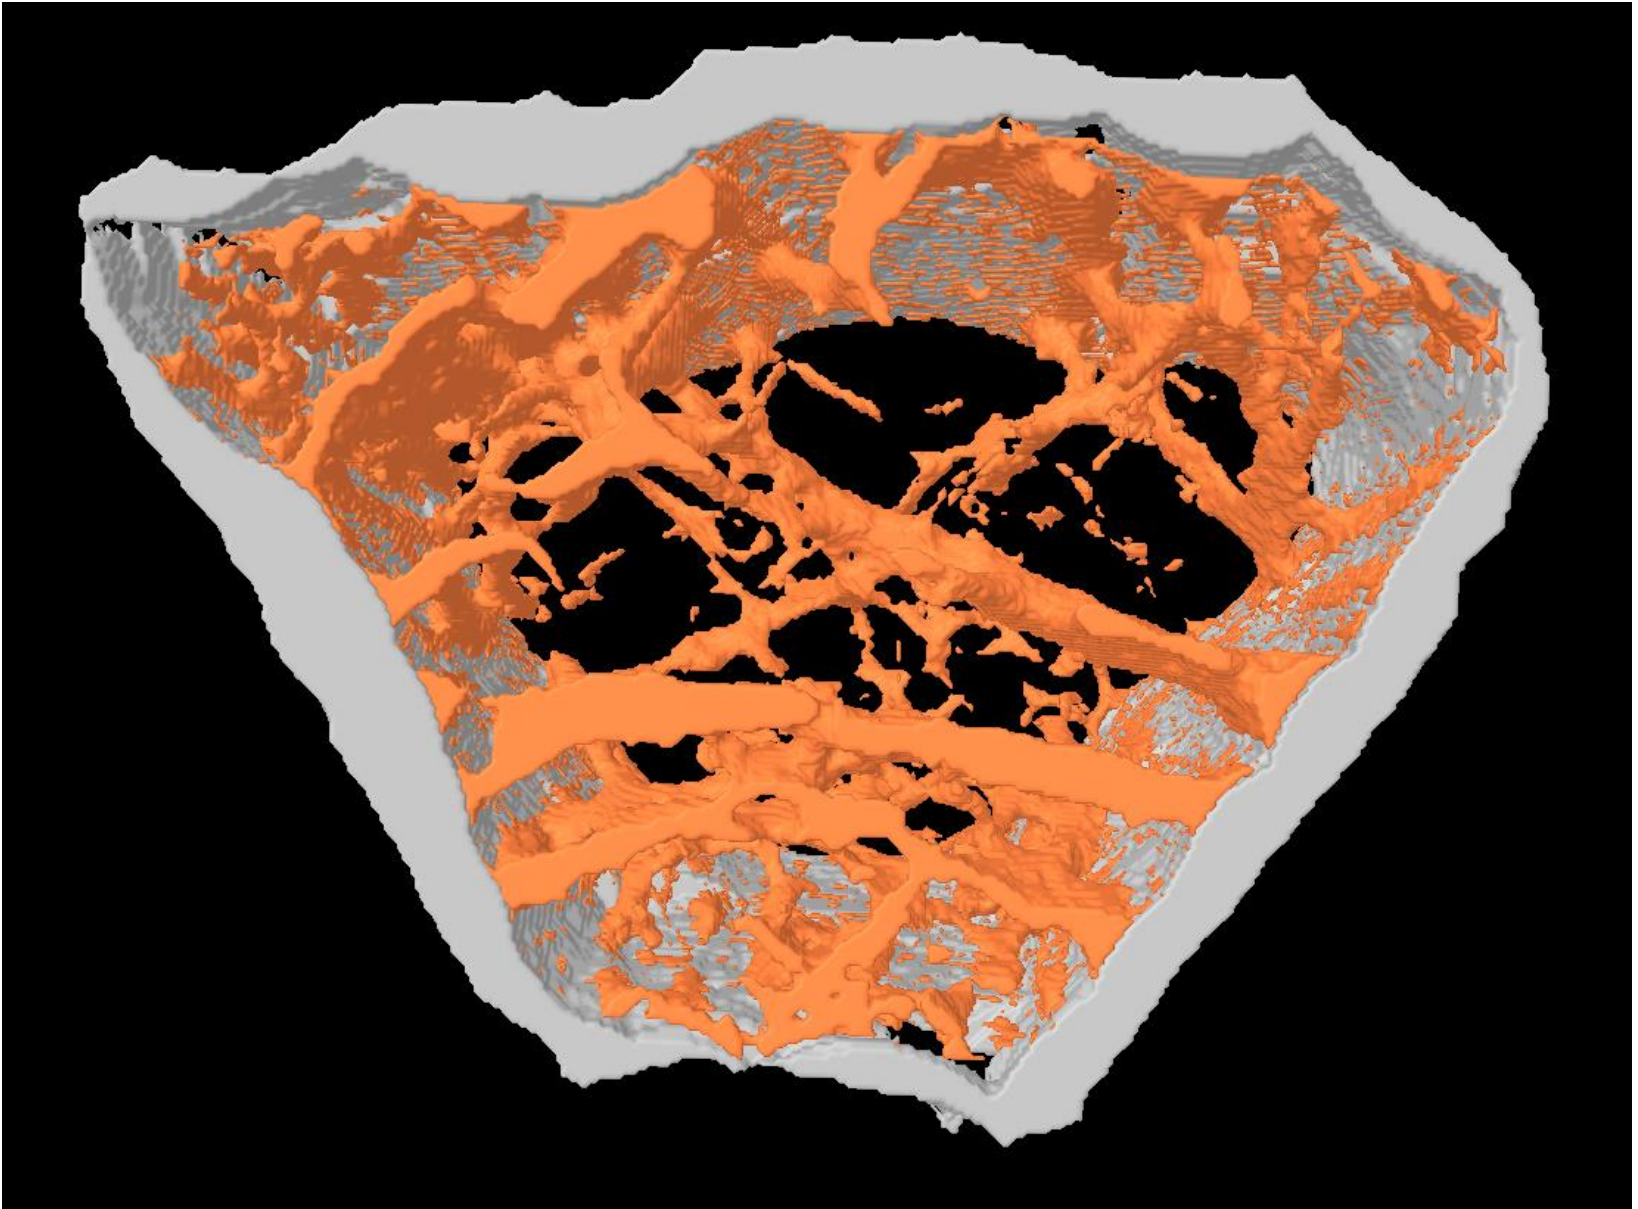



# Evaluation of bone mineral density and new bone formation in ovariectomized mice

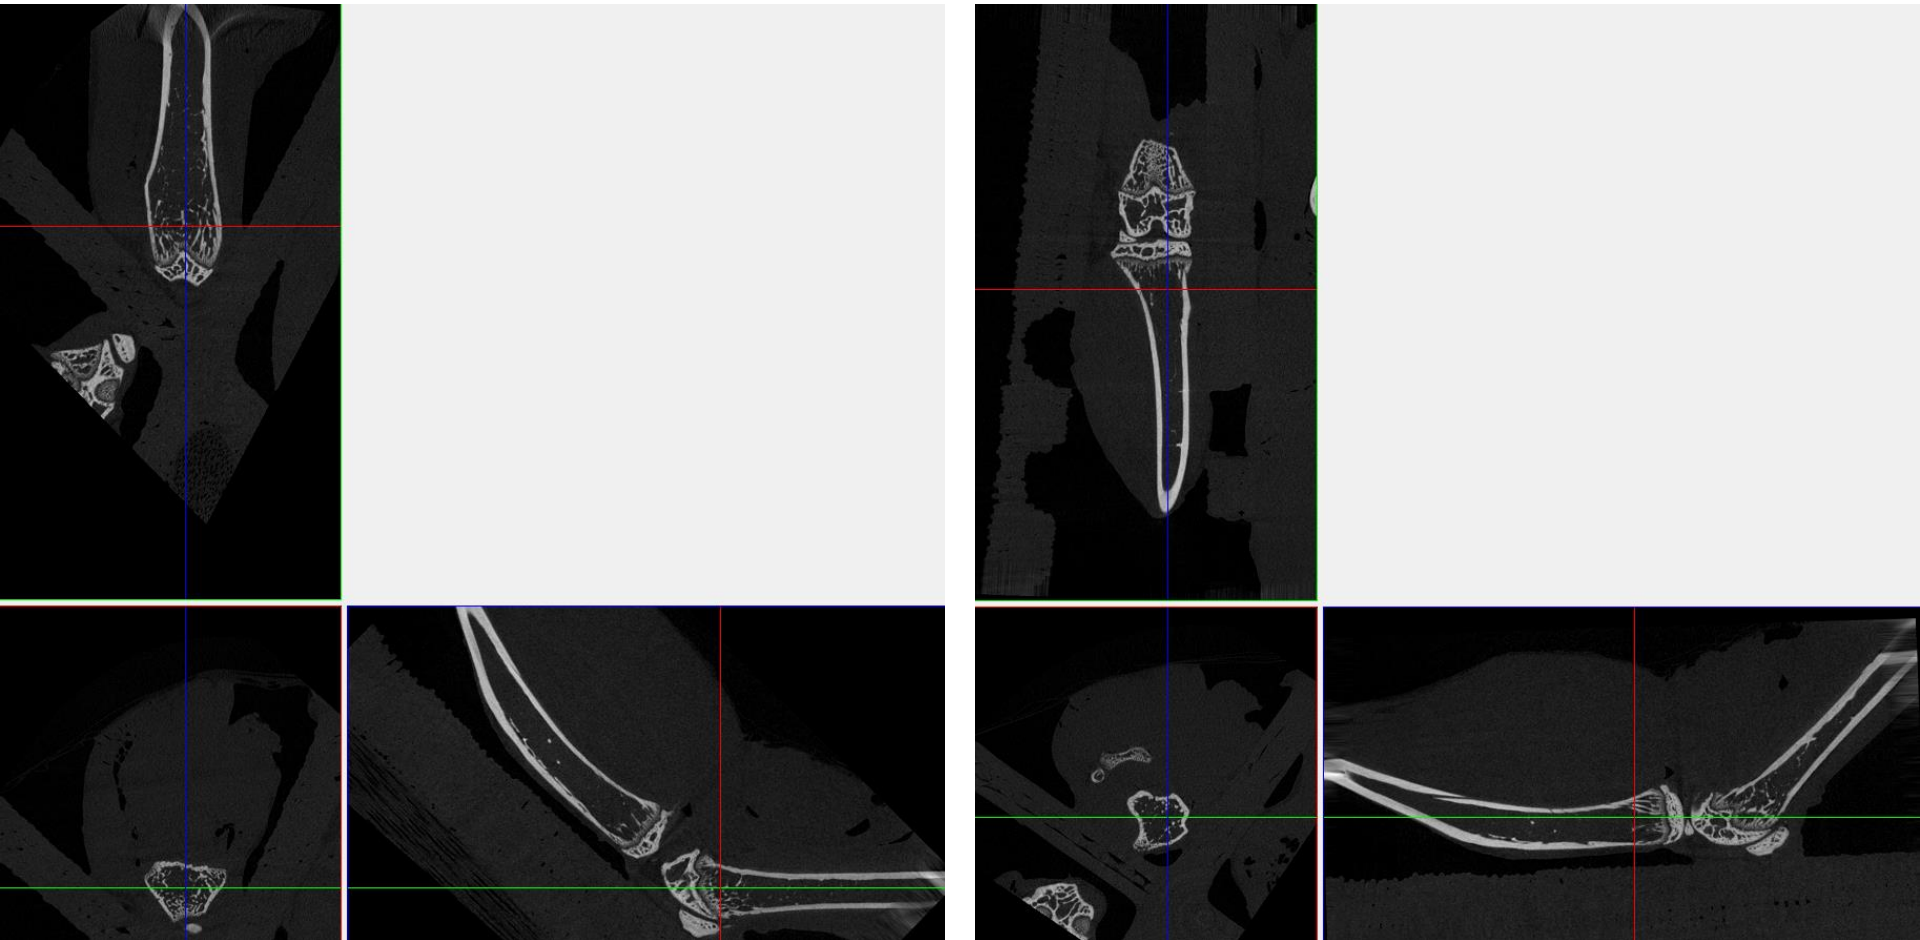



## Evaluation of bone mineral density and new bone formation in ovariectomized mice

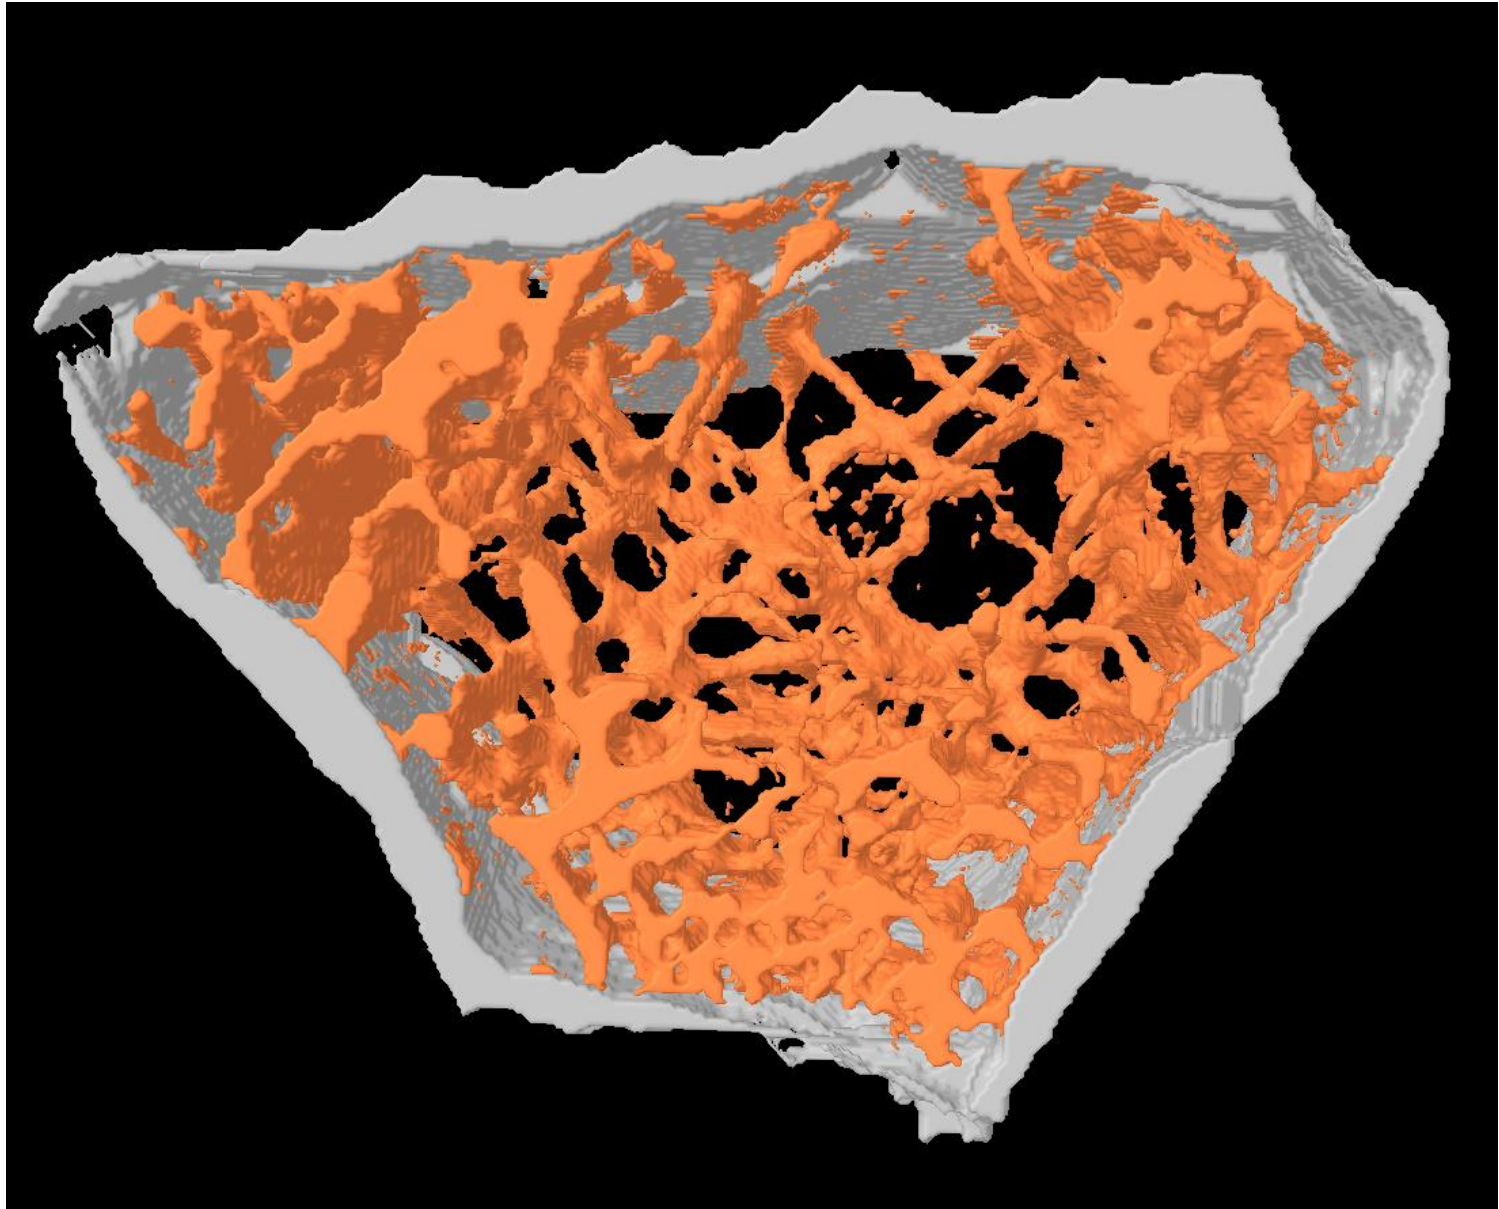

# Evaluation of bone mineral density and new bone formation in ovariectomized mice

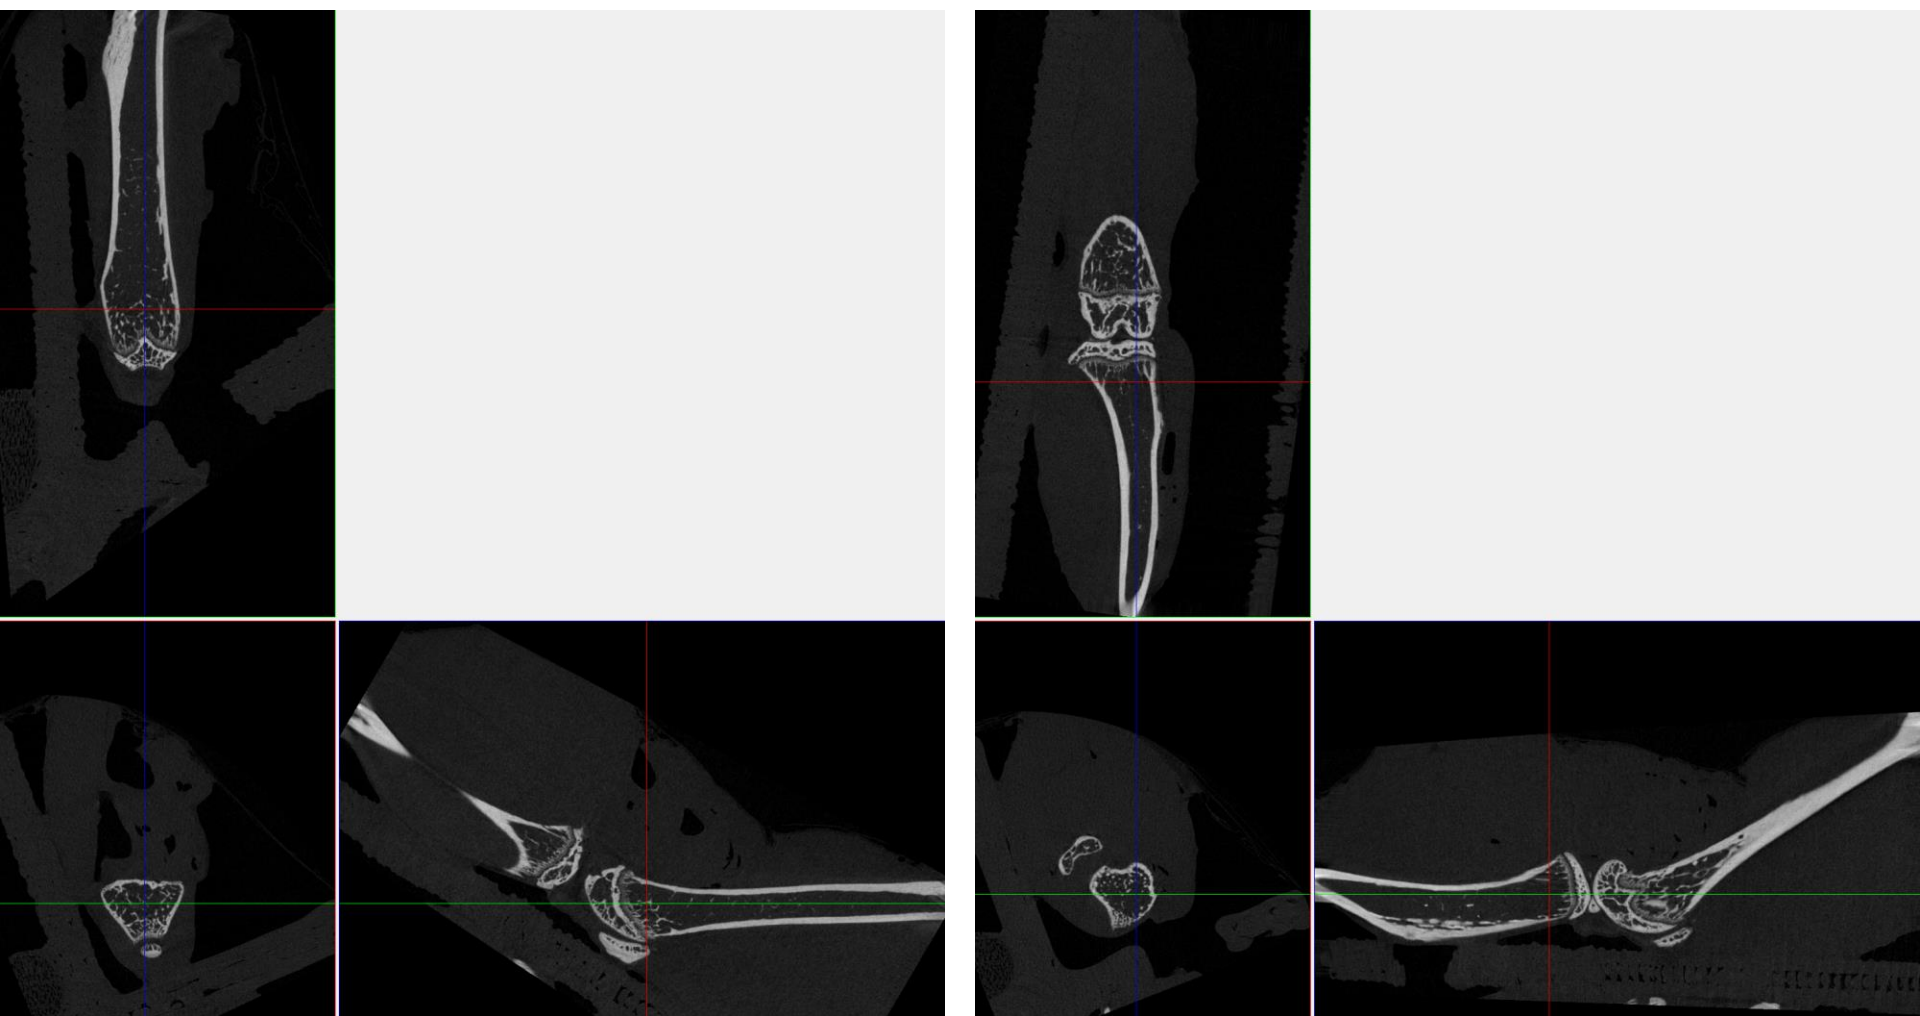

## Evaluation of bone mineral density and new bone formation in ovariectomized mice

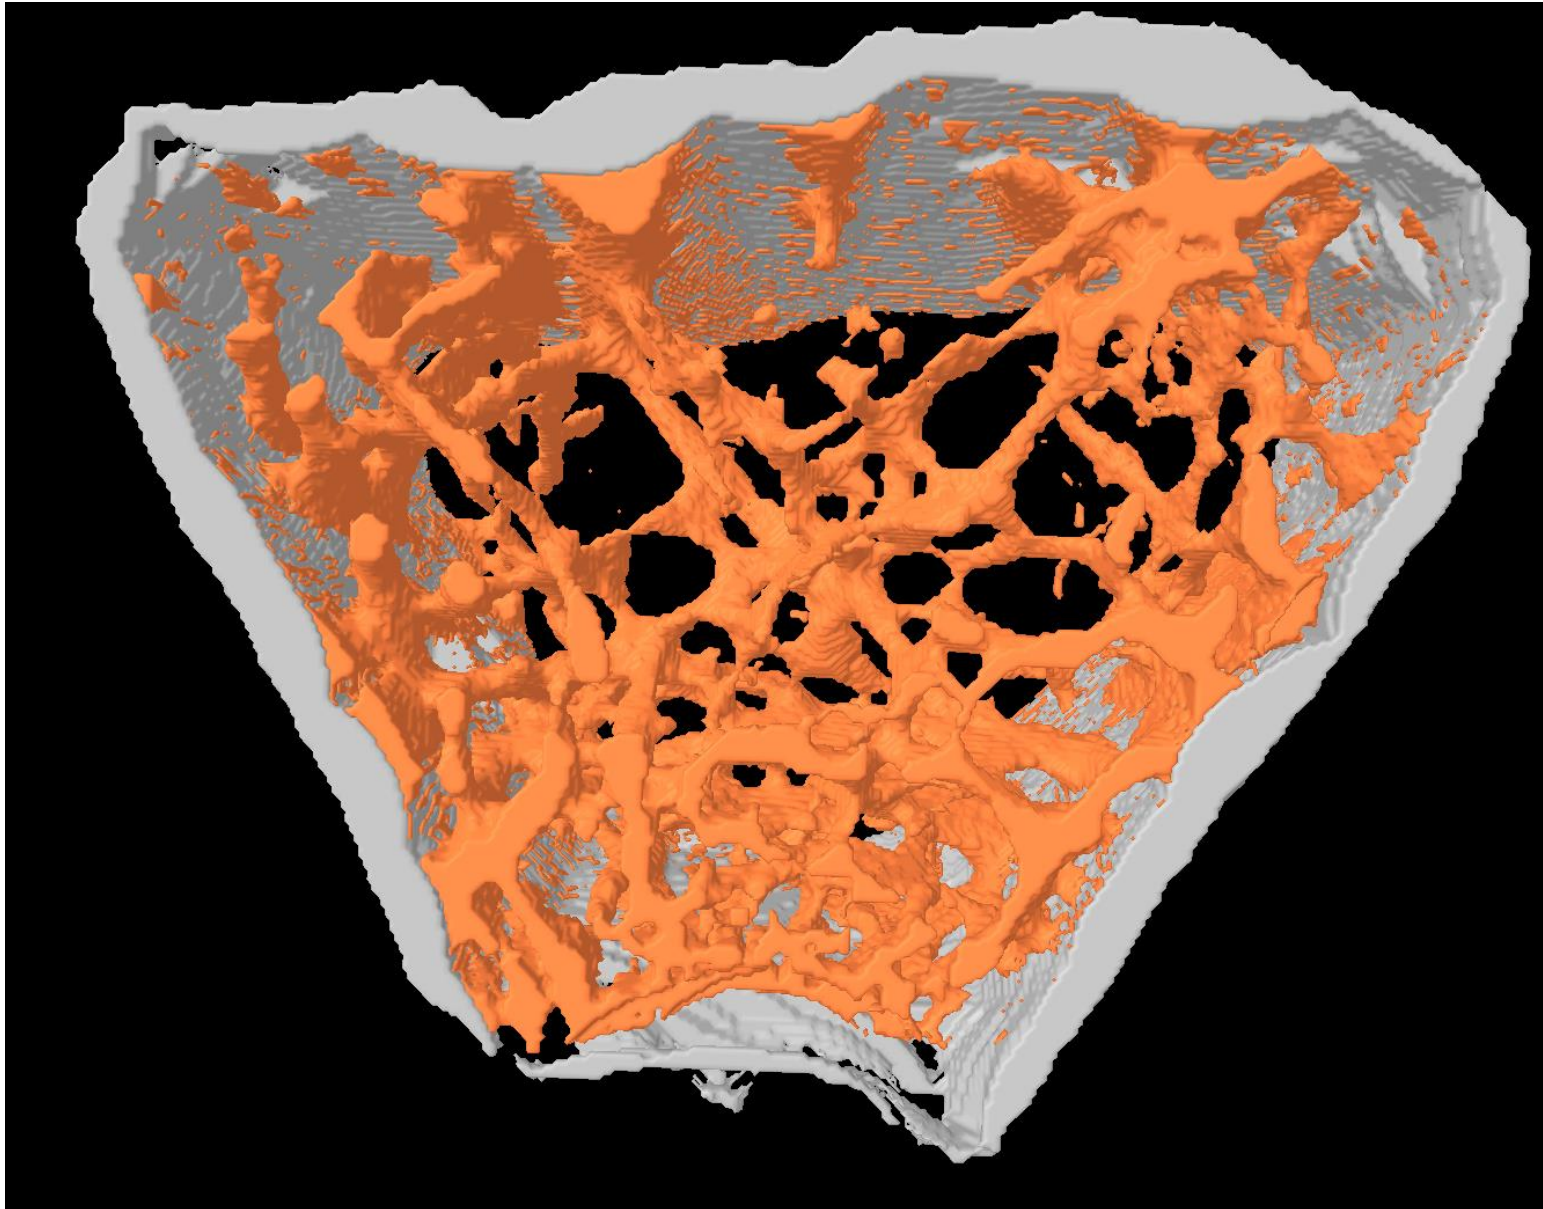



# Evaluation of bone mineral density and new bone formation in ovariectomized mice

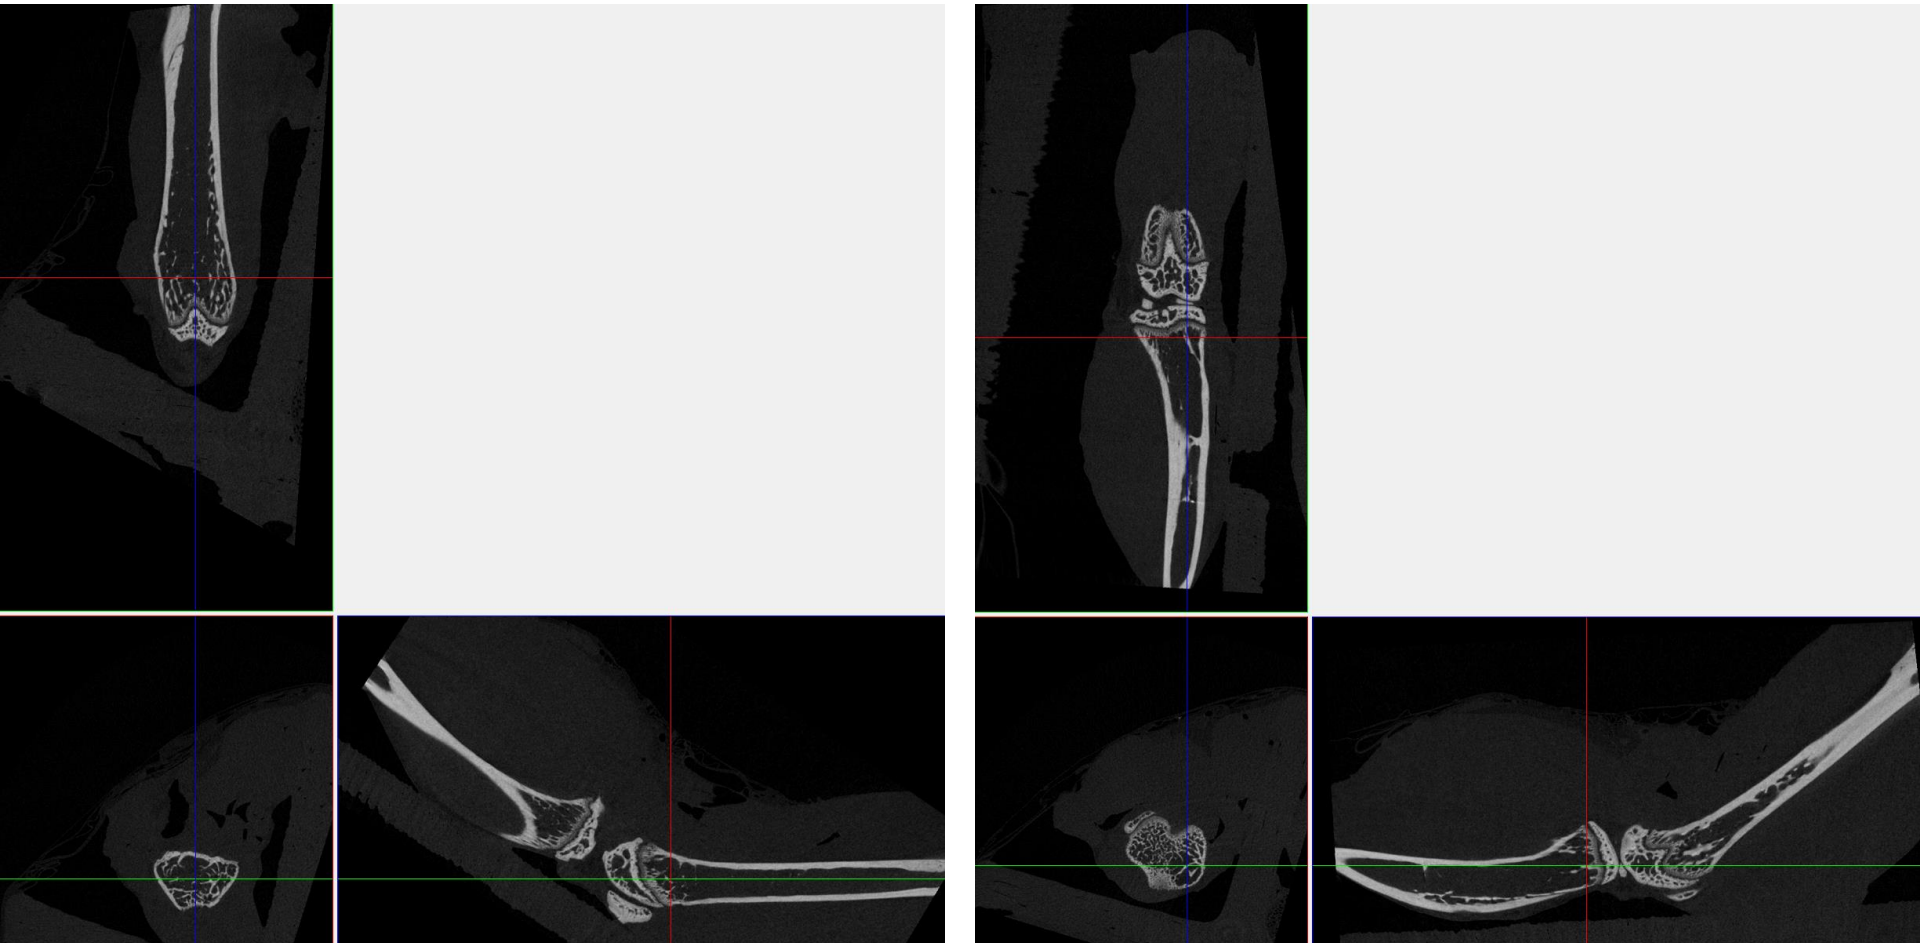



## Evaluation of bone mineral density and new bone formation in ovariectomized mice

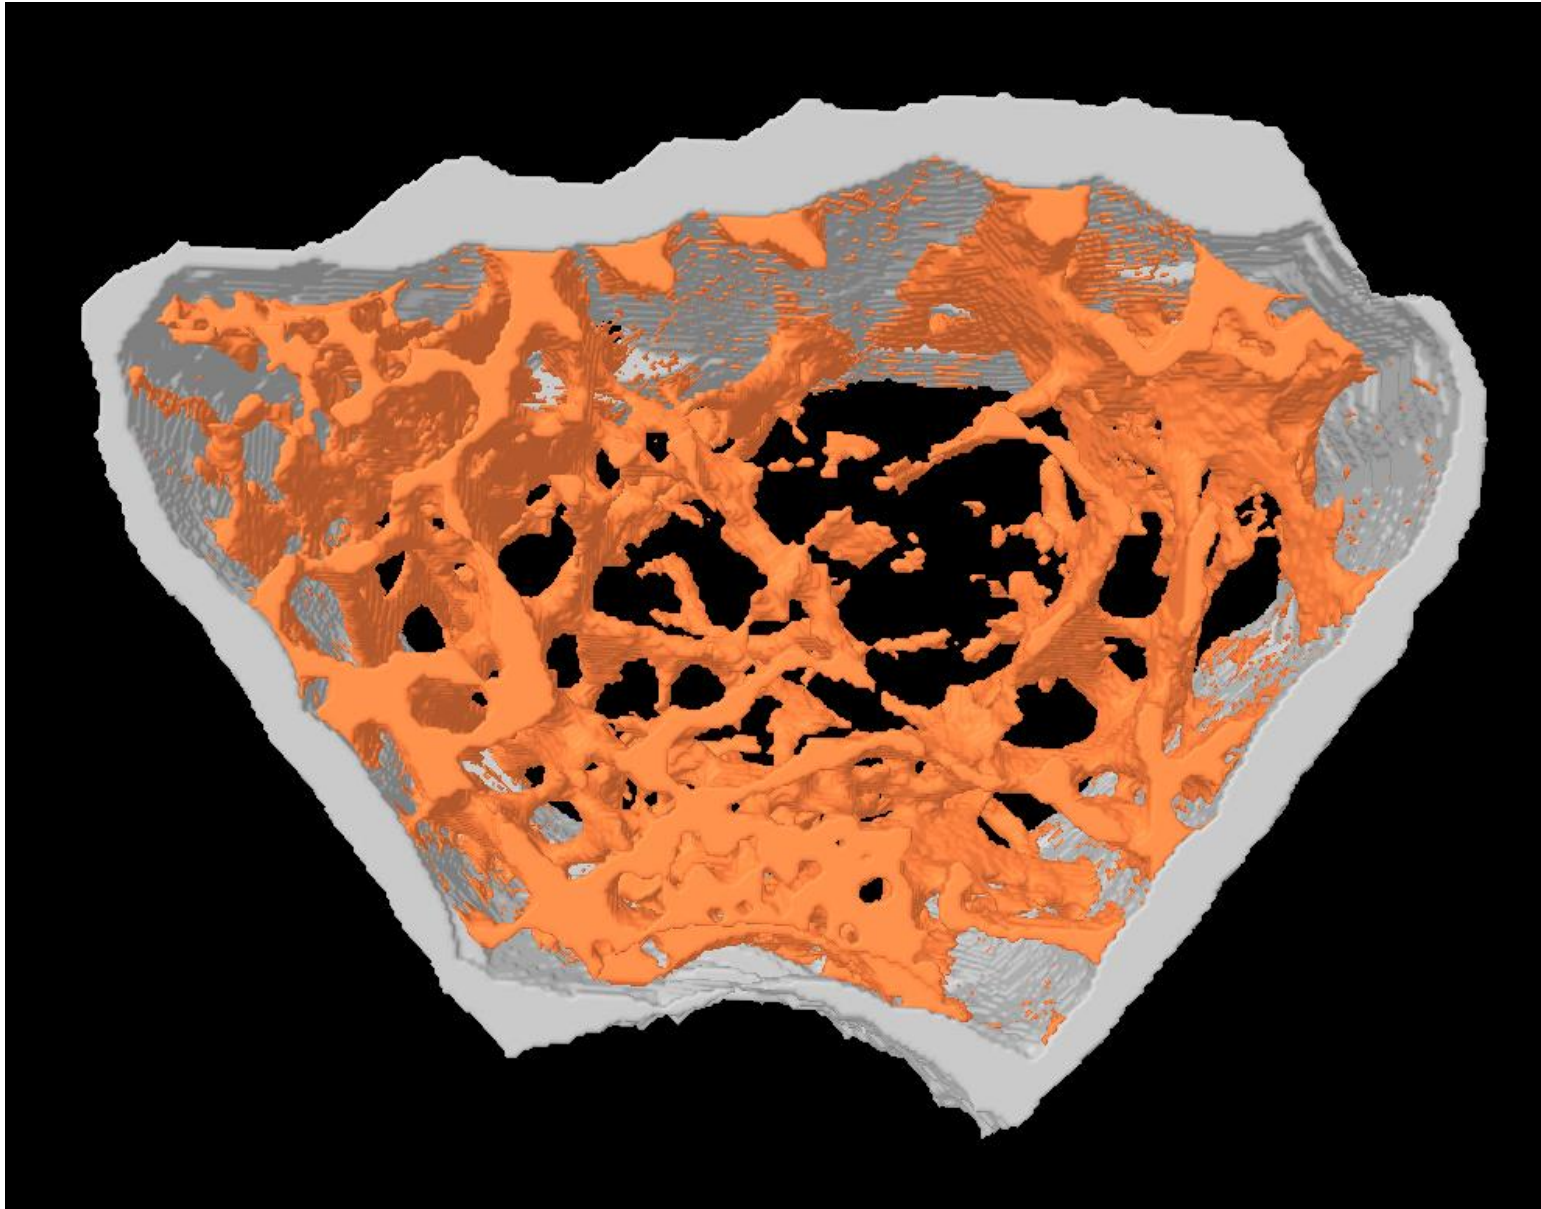

# Evaluation of bone mineral density and new bone formation in ovariectomized mice

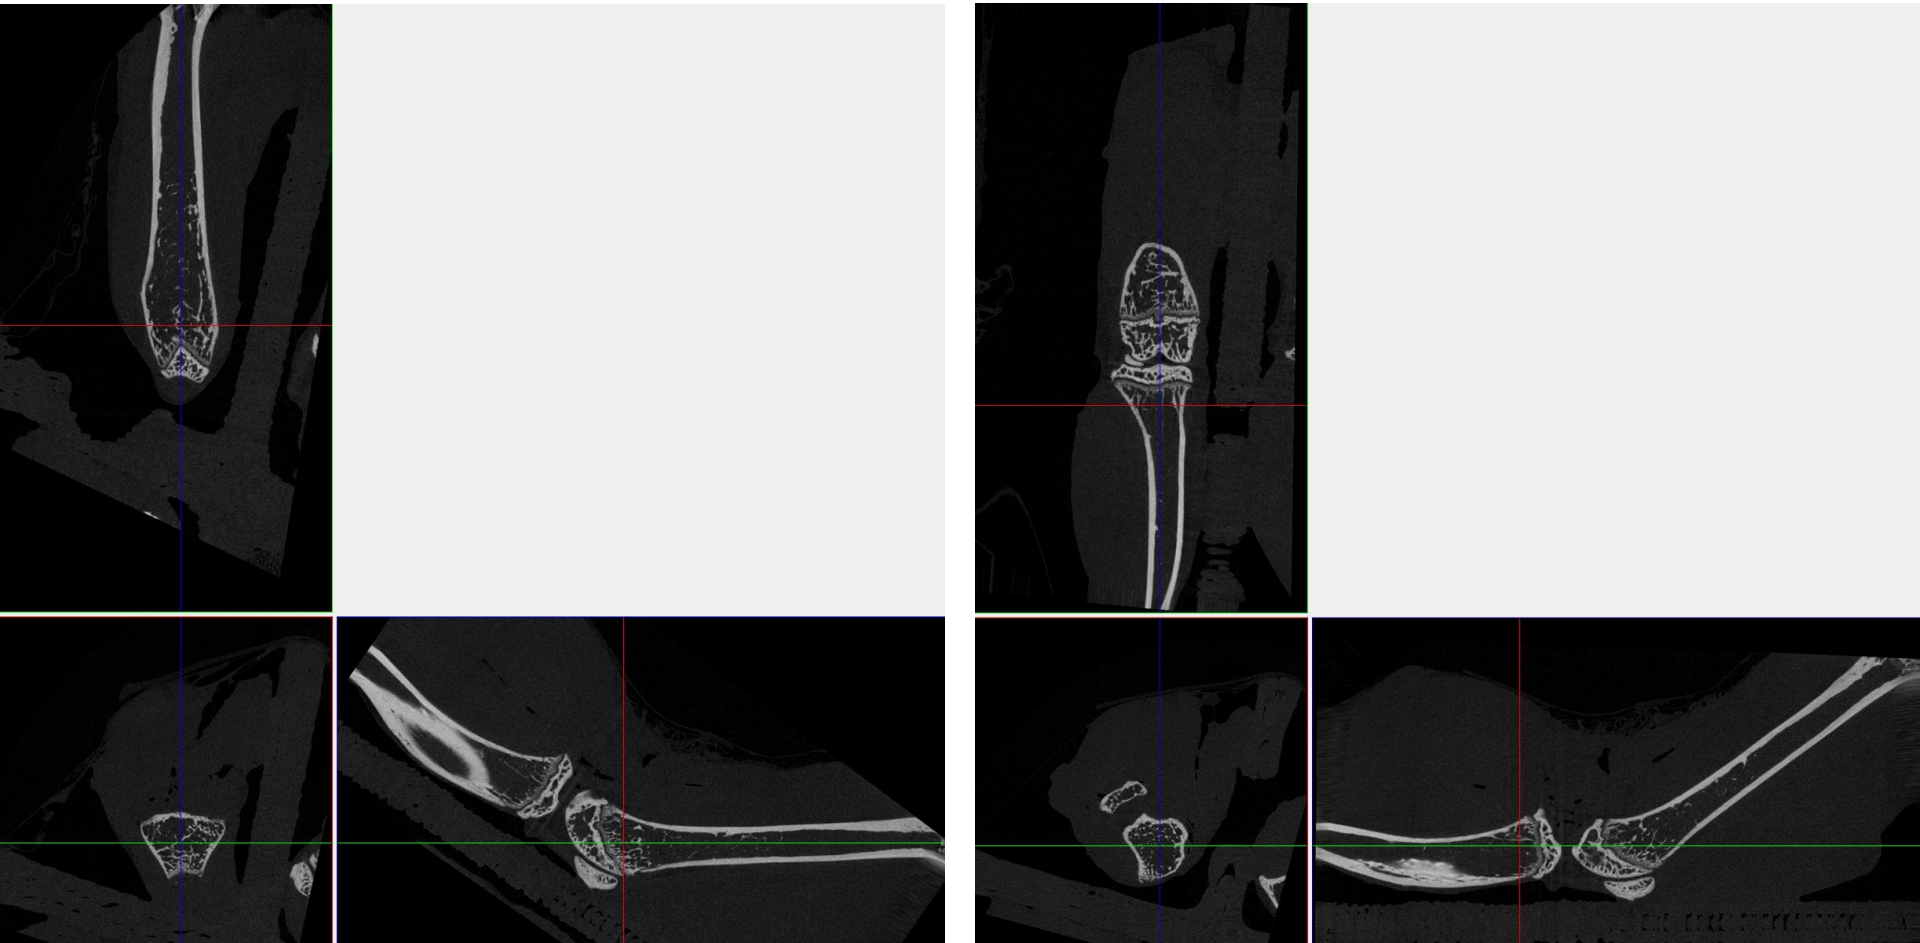

## Evaluation of bone mineral density and new bone formation in ovariectomized mice

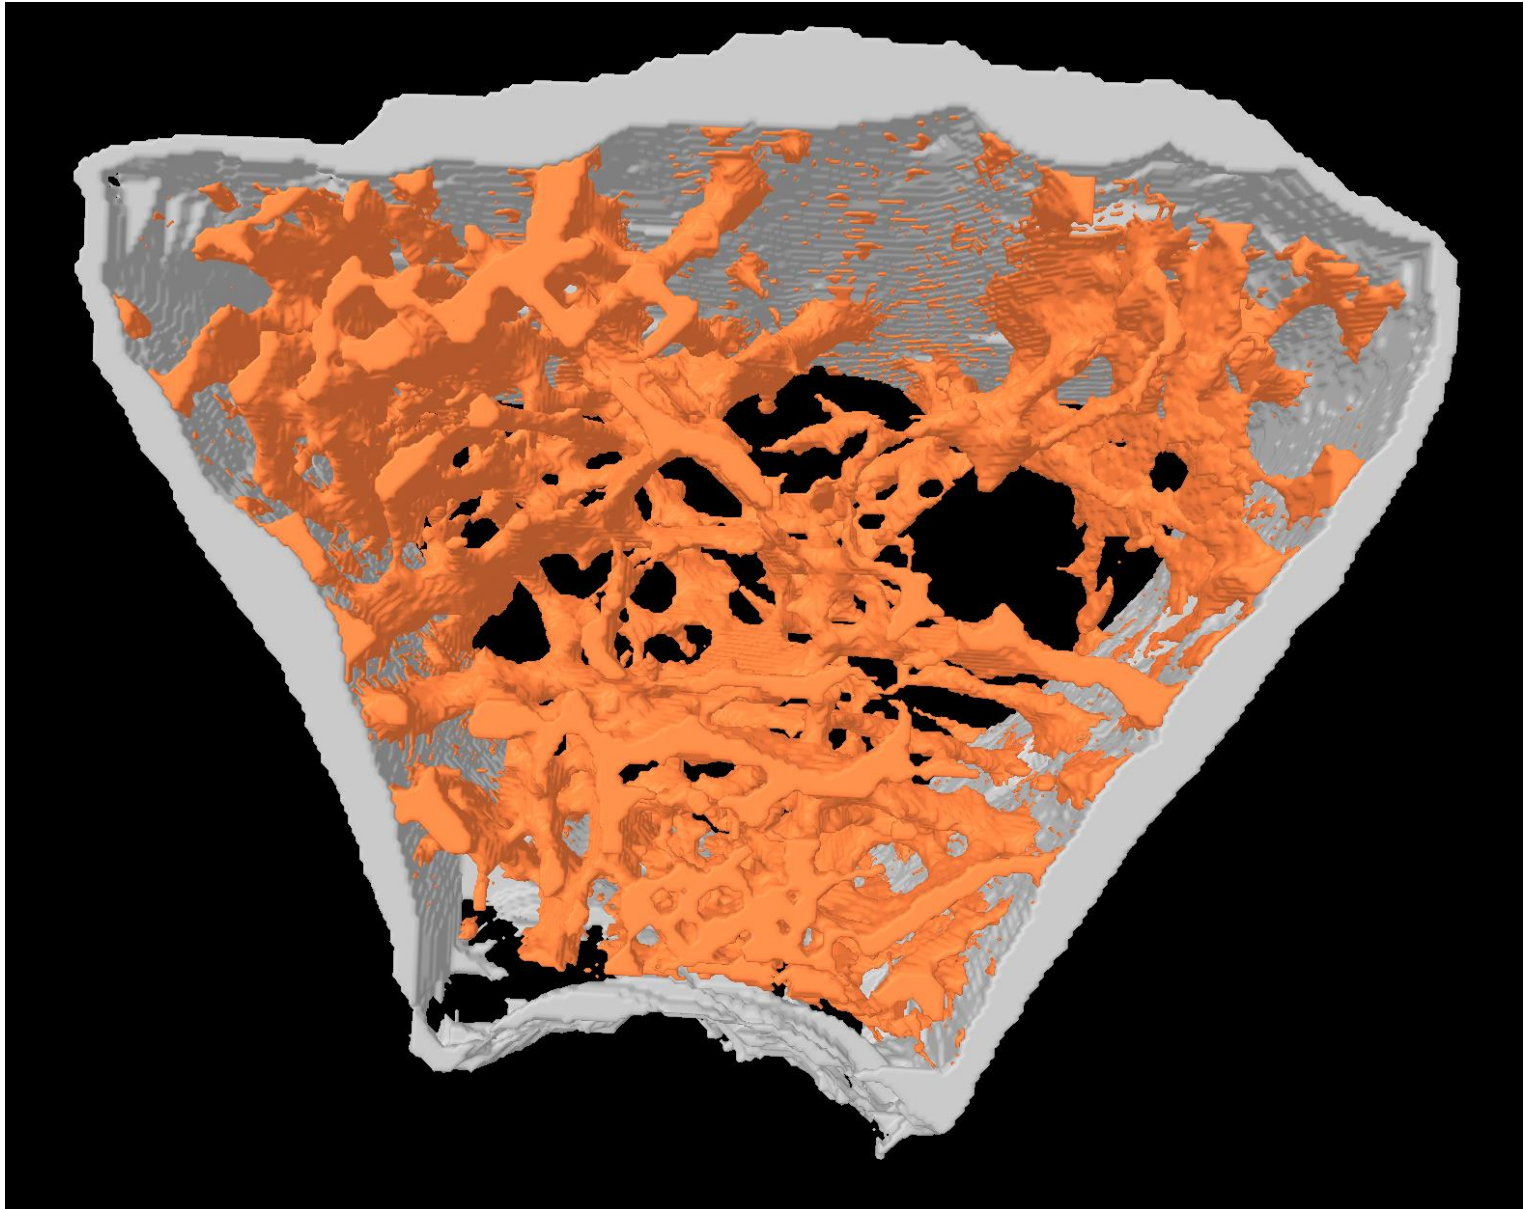



# Evaluation of bone mineral density and new bone formation in ovariectomized mice

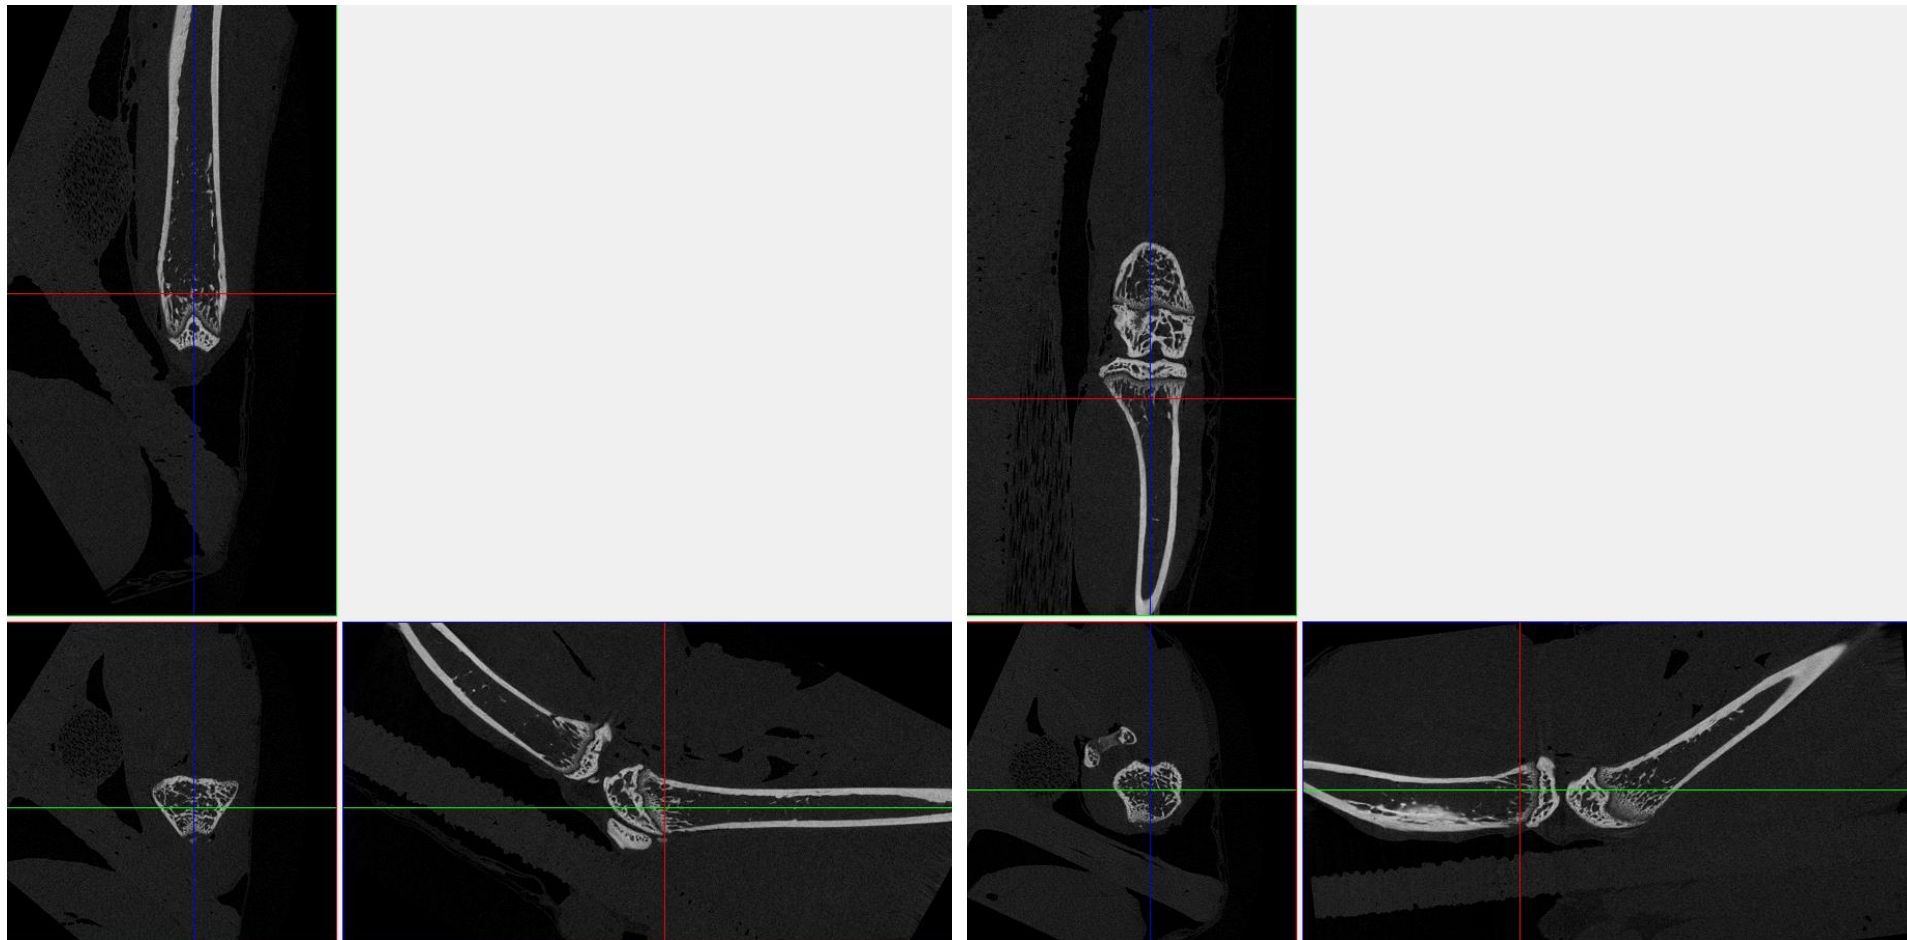



## Evaluation of bone mineral density and new bone formation in ovariectomized mice

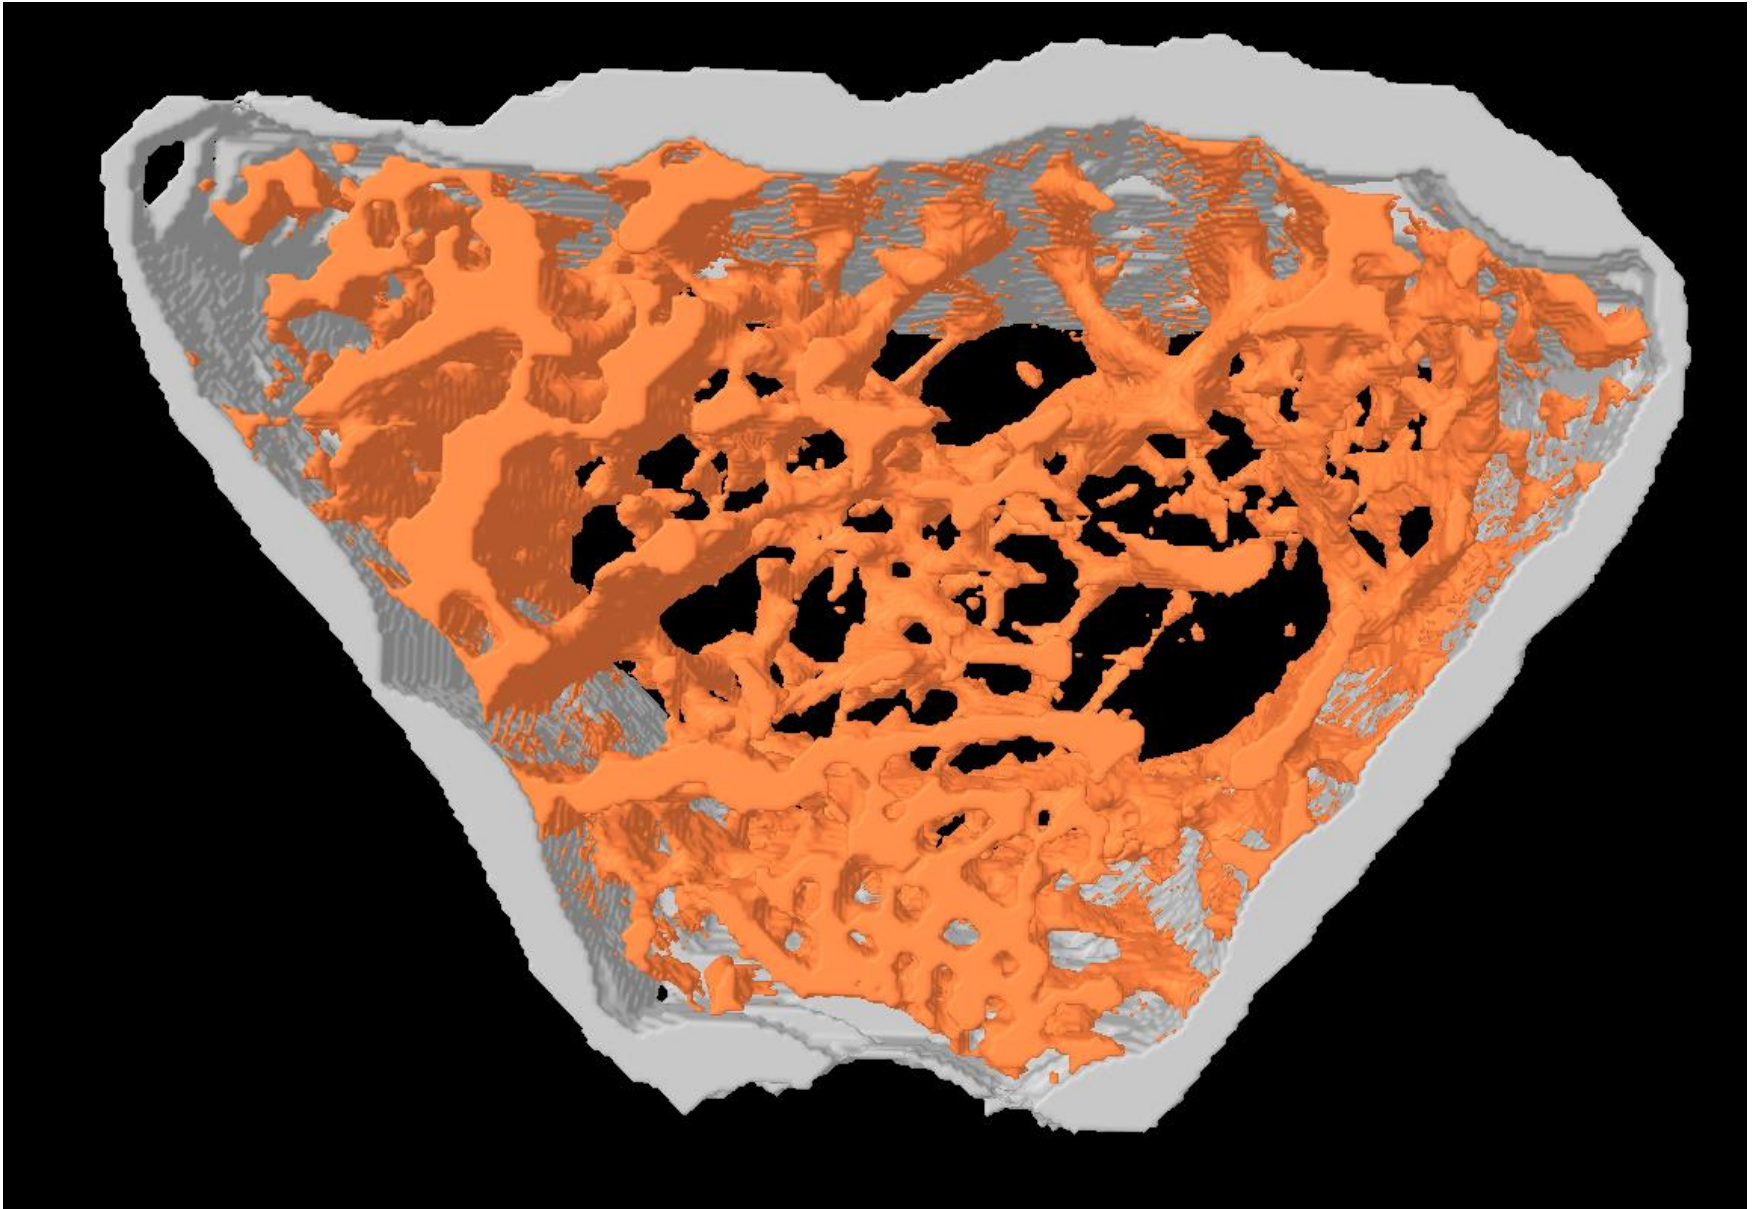

# Evaluation of bone mineral density and new bone formation in ovariectomized mice

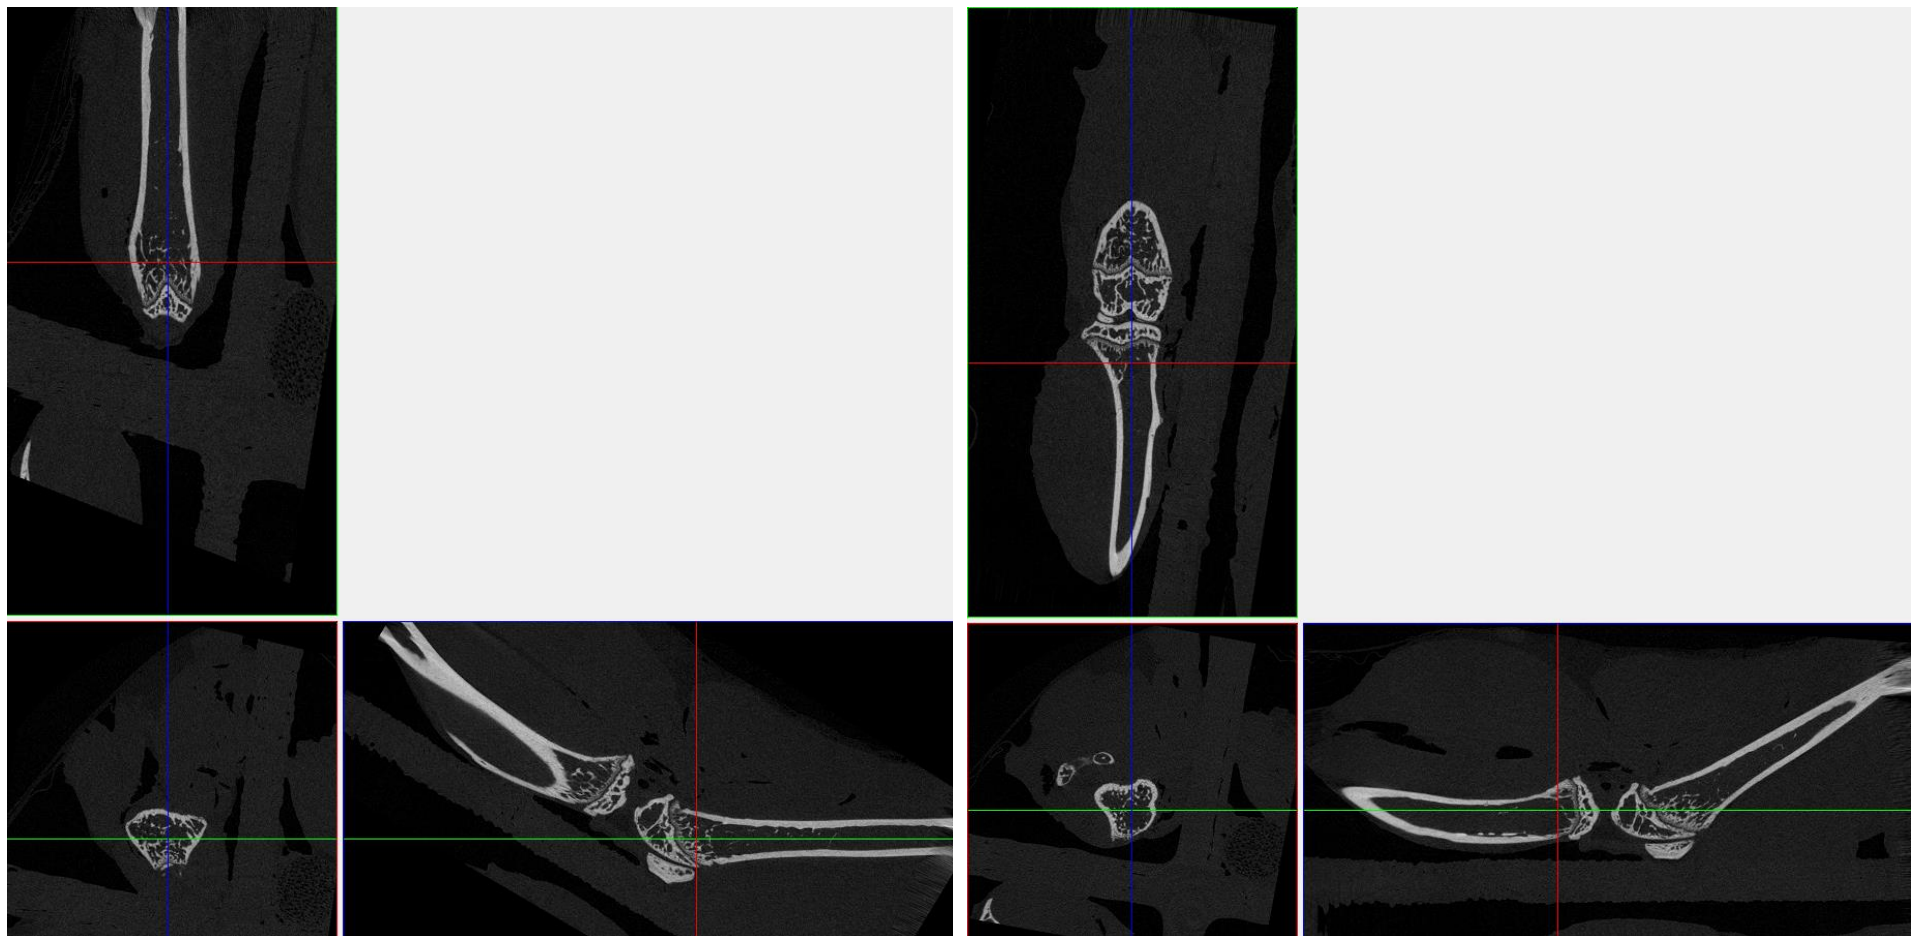

## Evaluation of bone mineral density and new bone formation in ovariectomized mice

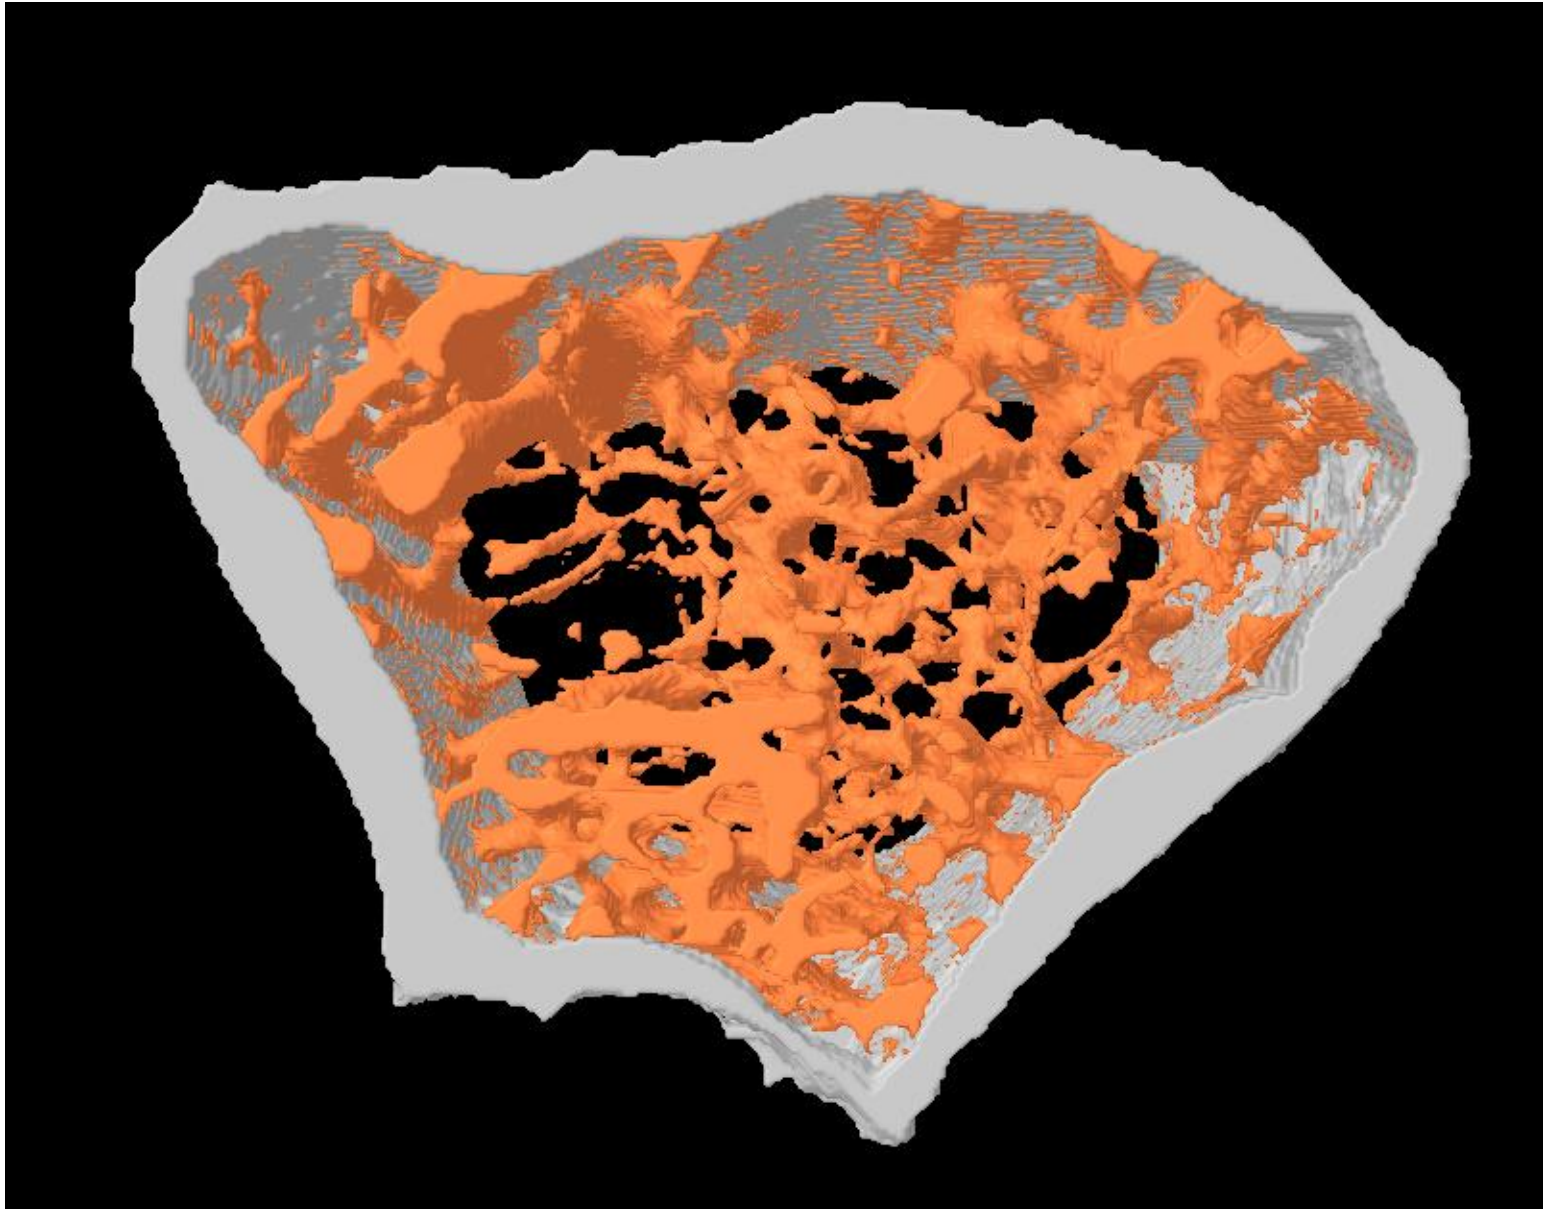

Supplement: Supplementary file 1 [file 15638702]
